# Supplementary material for: A Prospective Study of Fatty Liver Index and Incident Hypertension: The KoGES-ARIRANG Study
Source: PLoS One. 2015 Nov 30;10(11):e0143560. doi: 10.1371/journal.pone.0143560 (PMC4664241; doi:10.1371/journal.pone.0143560)
Supplement: S1 Dataset — (XLSX) [file pone.0143560.s001.xlsx]

## Sheet: _YY1
W00_sex	W00_age	W00_htncu	W00_dmcu	W00_smoke	W00_exer	W00_weight	W00_waist	W00_glu_fbs	W00_t_bil	W00_creatinine	W00_tchl	W00_hdl	W00_ldl	W00_tg	W00_crp	W00_r_gtp	W00_ast	W00_alt	W00_AlbuminRU	W00_ALCOHOL_DAY	W00_BMI	W00_homa_ir	W00_Leptin	W00_Uricacid	W00_SBP	W00_DBP	W00_HbA1C	W00_Adiponectin	w01_smoke	w01_drink	w01_exer	w01_waist	w01_bmi	w01_glu_fbs	w01_t_bil	w01_creatinine	w01_tchl	w01_hdl	w01_ldl	w01_tg	w01_r_gtp	w01_ast	w01_alt	W01_uricacid	W01_HbA1c	W01_CRP	W01_Leptin	W01_SBP	W01_DBP
2	58			1	1	58.5	81	92	1.08	0.86	228	46	159	101	0.98	18	28	28	5.4	5	23.0818	2.19	3.47	5.5	110	60	5.2	4832.6	1	3	1	79	23.358	89	1.3	0.79	228	48	135	141	11	26	23		5.2	0.31		140	80
1	68			1	1	68	97	92	0.43	1.08	178	33	112	182	5.82	18	23	15	6.02	125	25.2826	2.66	4.69	4	130	80	5.4	7085.2	1	2	1	89	23.3337	97	0.44	1.04	192	48	112	138	21	15	7	3.6	5.6			122	80
2	51			1	2	55.3	80	92	0.8	0.9	165	48	89	144	0.41	19	30	24	0.71	51.0714	23.6234	1.81	5.54	3.2	110	70	5.7	8659.3	1	3	2	81	23.0379	92	0.9	0.8	208	52	109	123	27	27	25		6.4	0.42		131	79
1	52			3	1	73.6	97	98	1.03	0.94	187	37	115	206	2.05	50	29	21	0.74	178.571	24.7343	1.5	2.29	6.1	110	80	5.8	5504.9	3	3	1	97	24.4886	103	1.2	0.89	146	45	63	173	24	21	16		5.7	1.12		111	71
2	55			1	1	69.1	90	90	0.78	0.76	176	38	116	109	1.23	16	23	17	0.79		25.8489	1.46	6.89	3.2	110	60	5.9	15596	1	1	1	89	24.4794	86	1	0.73	202	46	116	125	21	30	28		6.3	0.78		142	84
1	53			1		66.8	88	102	0.84	1.01	260	50	176	176	1.14	37	53	82	0.76		25.0498	2.2	1.9	5.9	120	70	5.4	5340.2	1	1	1	86	23.686	99	1.1	0.84	192	36	112	139	18	27	37		5.6	1.41		108	72
2	51				1	61	80	91	0.83	0.89	183	43	121	62	0.2	5	25	15	0.82	3.33333	25.5548	1.92	7.77	3.3	120	80	5.3	11593	1	3	1	78	24.2876	91	1	0.82	164	43	102	44	9	19	14		5.3	0.4		131	82
2	60			1	1	46.2	72	87	0.48	0.96	171	46	99	118	0.66	8	25	16	1.06		20.8099	1.46	4.1	5.1	120	70	5.3	14290	1	1	1	72	20.5066	89	0.59	0.99	200	45	130	90	13	23	15	6.4	5.4			100	70
2	51			1	1	72.8	98	79	0.47	0.97	170	40	93	217	3.08	14	17	15	0.95		30.146	1.65	12.71	4.3	120	80	5.4	4824.4	1	1	1	107	191.504	87	0.65	0.93	192	43	117	111	17	18	22	5	5.4			130	100
2	50			1	1	47.3	83	86	1.31	0.69	191	50	112	79	9.6	128	268	239	4.43		24.1672	1.52	9.12	4	120	80	5.5	17786	1	1	1	86	23.7924	106	0.8	0.67	186	44	115	91	14	25	25		6.2	0.63		120	71
1	64			1	1	59.6	80	94	0.72	1.04	210	59	129	62	0.16	12	27	20	0.69		21.243	1.6	1.19	6.1	130	70	5.9	13743	1	1	1	77	20.1622	94	1.1	0.93	190	48	118	63	6	36	23		5.3	0.01		128	81
2	62			1	1	68.4	109	80	0.88	0.74	155	38	96	90	0.44	6	18	13	0.71		29.6053	1.32	4.7	3.2	110	80	4	13628	1	1	1	105	30.4579	83	0.7	0.71	197	52	122	60	11	14	13		5	1.47		102	62
1	57			1	1	53.3	88	106	0.8	1.14	171	45	101	125	0.35	22	25	23	0.74		21.083	3.55	1.62	4.8	110	70	5.9	8326	1	1	1	75	19.6917	110	0.7	1	148	44	82	68	14	21	14		6.1	0.84		120	60
1	42	3	4	3	2	63	84	96	0.94	0.81	190	55	118	94	0.57	17	30	22	0.71		21.2953	1.56	1.54	3.8	120	80	5.6	10564	3	3	1	86	21.8954	92	0.83	0.82	180	37	118	95	11	24	17	4.5	5.6			102	67
2	51					54	82	84	0.89	0.87	176	55	106	64	0.6	22	20	17	0.76		25.0236	1.24	4.09	4.5	120	80	5.2	21530	1	1	1	73	24.6656	97	1	0.8	203	58	111	69	13	21	21		5.4	3.68		140	90
1	46			1	1	59.4	84	88	0.86	1.04	131	30	58	295	0.44	11	25	21	0.72		21.6604	2.16	1.5	5.1	110	80	5	7538.5	1	1	1	86	21.0325	90	0.46	1.02	118	27	54	199	12	23	20	5.2	5.3			100	70
2	44			1	1	52.7	71	83	0.78	0.79	178	64	96	62	0.36	12	22	9	1.11		21.1104	2.03	3.03	3.6	120	70	5.4	16614	1	1	1	75	22.4724	89	0.65	0.74	200	58	115	64	11	22	9	3.2	5.7			122	82
1	45			3	1	70	96	86	0.49	1.04	174	32	98	247	2.59	17	24	26	0.71	46	25.5257	1.73	1.45	4.2	120	80	5.5	4950.9	3	1	1	90	24.977	88	0.87	1.02	193	29	128	174	21	21	19	4.8	5.9			110	70
2	67			1	1	41.4	78	81	0.59	0.75	179	48	107	115	0.22	10	26	20	5.48		19.1326	1.3	1.37	3.2	130	80	5	20630	1	1	1	69	18.3507	84	0.8	0.7	184	45	115	83	8	22	16		5.2	0.13		120	78
2	52			1	1	67.9	88	89	0.67	1	270	77	172	98	3.19	20	29	26	1.72		30.0175	2.09	17.96	4.2	110	70	5.4	6732.2	1	3	1	91	28.6159	90	0.8	0.79	182	59	100	64	12	23	15		5.3	0.66		100	80
2	68			1		65.4	94	86	0.39	1.03	221	40	137	253	2.75	16	27	21	0.71	20	31.6271	2	12.11	4.9	110	80	5.5	7414.7	1	3	1	89.5	31.4775	91	0.4	0.88	221	28	161	126	19	16	15	5.2	5.4			120	70
2	46			1	1	68.9	88	90	0.75	0.98	260	67	167	85	0.39	22	20	17	0.82		26.8469	2.53	8.6	3.8	120	70	5.8	4813.3	1	3	1	92	28.7109	100	0.93	0.95	314	46	236	184	48	32	40	4.9	6.1			112	88
1	62			2	1	56.8	77	85	1.01	0.97	158	52	88	54	0.17	10	29	21	0.83		21.2218	0.95	0.96	3.7	130	80	5.1	11887	1	1	1	73.5	20.7527	94	0.92	0.85	188	47	117	69	13	24	15	4.2	5.3			128	71
1	53			2	1	61.7	88	94	0.77	0.97	198	39	113	349	0.44	96	38	26	0.71		22.6905	1.35	1.8	6.9	110	70	5.2	5782.1	1	2	1	81	20.7802	99	0.64	0.86	129	40	66	78	171	36	20	11.1	5.2			140	81
2	42			1		69	95	95	0.5	0.97	142	38	70	222	0.61	7	22	16	0.71		26.5204	1.89	9.92	4.2	110	80	5.4	9461.1	1	3	1	90	27.3705	102	0.37	0.91	120	32	56	159	13	16	10	4.2	5.5			120	80
1	69			1	2	52.8	83	91	0.94	1.14	179	54	109	81	7.93	14	29	17	2.19		20.3191	1.21	0.96	4.8	120	80	5.2	11292	1	3	2	72	20.6782	91	0.9	1.09	156	53	76	103	18	31	19		5.2	0.51		108	65
2	63			1	2	44.1	80	85	0.67	0.77	169	65	89	53	0.42	8	40	28	0.69		16.4165	2.06	1.19	3.5	100	70	5.2	17637	1	1	2	71.2	15.3374	93	0.71	0.77	201	57	114	67	16	27	17	3.5	5.6			102	66
1	58			3	2	76.5	91	91	1.27	1.04	138	36	71	194	2.16	23	27	13	2.88		26.2232	1.39	1.19	4.3	130	80	5.2	6412.3	3	3	2	91	27.2935	100	1.21	1.04	170	35	107	121	22	22	12	4.3	5.9			112	82
2	42			1	1	53.9	75	94	0.76	0.78	179	54	105	82	0.47	8	24	20	0.99		22.5221	1.44	6.89	3.6	120	80	5.3	12729	1	3	1	73.2	22.0206	93	0.77	0.78	176	46	104	84	11	20	14	4.8	5.5			100	68
2	66			1	2	63.8	95	90	0.47	0.76	201	48	122	148	6.27	16	20	20	0.82		28.8147	1.77	13.69	3.5	130	80	5.8	16294	1	1	1	94	28.1602	88	0.7	0.76	176	37	103	126	6	23	18		6.1	0.97		127	88
1	53		2	3	1	56.3	87	234	0.73	1.08	172	36	105	184	2.22	17	23	22	0.71		19.9951	3.63	3.48	3.4	120	80	10.1	2632.9	3	3	2	86	22.3835	147	0.54	1.13	155	33	99	70	14	24	36	6.4	7.4			110	70
2	53			1	1	57.2	76	88	0.73	0.83	221	57	142	113	0.37	22	36	35	0.94		23.2947	1.49	6.97	4.1	120	80	5.4	12695	1	1	1	90.5	24.9654	88	0.61	0.78	234	36	162	170	18	36	45	3.2	5.7			138	80
2	45				2	72.2	91	109	1.5	0.91	253	52	171	138	0.51	12	28	34	0.74		26.9756	3.01	9.24	4.6	130	70	5.7	7571.1	1	1	2	89	25.5871	99	0.9	0.91	227	38	155	147	14	17	20		5.9	3.23		141	93
2	63			1	1	54.4	86	89	0.91	0.79	213	60	132	81	0.22	9	25	22	0.71		21.9578	1.42	11.15	3.4	110	70	5.5	12388	1	1	1	83	20.2442	82	1.1	0.7	201	61	105	65	9	24	21		6.1	0.21		111	70
1	52			1	1	65.5	88	100	0.58	1.03	216	38	125	306	2.05	72	36	35	6.9		25.4268	1.96	1.67	6	130	80	6	4874.4	1	3	1	87	25.7238	110	0.6	0.95	178	38	92	274	29	27	25		5.6	0.47		126	88
2	47			1	2	60.7	72	99	1.09	0.94	191	74	102	54	0.05	7	37	22	0.76		21.7128	0.96	5.06	3.7	100	70	5.5	23939	1	3	2	78	21.6633	97	1	0.93	212	66	121	52	11	30	18		5.6	0.07		102	60
2	52			1	1	56.6	86	91	0.72	0.89	270	53	183	174	2.73	19	36	32	0.73		26.9947	2.23	23.81	4.8	110	70	5.5	6719.3	1	1	1	89	26.5801	91	0.8	0.91	273	42	183	212	19	45	43		5.8	1.82		119	78
1	65			3	2	74.5	88	99	0.47	1.08	182	40	103	196	1.63	20	24	21	1.88		24.5223	2.14	4.58	4.2	100	70	5.5	7045.2	3	1	2	85	22.5565	89	0.6	1.04	186	42	111	139	16	22	15		6	3.06		100	63
2	52			1	1	56.4	82	87	0.94	0.86	175	56	87	138	0.52	19	32	32	0.75	17.8571	23.8433	0.97	6.83	4.3	120	70	5.4	17510	1	2	1	81	24.0051	94	1	0.82	193	54	102	82	9	21	17		5.6	1.25		110	71
1	48			2	1	74.5	92	86	1.59	1.19	208	36	144	147	0.32	14	24	20	1.53		26.4905	1.36	1.64	4.6	110	80	5.1	5665.2	1	1	2	87	25.3987	88	1.4	1.15	182	40	118	76	12	20	20		5.1	0.24		112	86
2	47			1		45.5	63	82	0.91	0.91	207	52	122	194	0.36	10	21	13	0.74		20.1953	1.13	3.53	3.8	90	60	5	9670.4	1	1	2	67	19.4109	87	0.9	0.84	207	41	128	151	11	25	22		5.5	0.25		100	70
1	66			2	1	75.6	98	98	0.77	1.26	176	55	104	102	0.8	167	62	62	2.85	125	28.0057	3.83	14.68	5.3	130	70	5.7	9070.6	1	3	1	98	25.6498	91	0.62	1.06	134	41	57	156	119	45	46	6	5.7			148	86
2	65			1	1	59.8	85	80	1	0.8	221	56	147	74	0.43	7	24	14	1.69		26.0197	0.93	3.2	2.5	120	70	5.5	20854	1	1	1	94	24.484	85	1	0.67	189	39	120	108	6	24	17		5.9	0.66		110	69
1	65			1	1	58.5	80	84	1.5	1	263	48	184	182	0.32	13	19	17	0.69		24.4442	0.49	1.81	4.7	130	80	5.2	6243.9	1	1	1	80	23.8059	80	1.2	0.93	215	55	133	100	9	21	18		5	1.07		131	78
2	48			1	1	54.2	82	88	0.72	0.85	212	36	126	316	0.43	10	22	8	0.74		23.8024	1.56	6.25	4.4	110	80	5.8	15515	1	1	1	80	23.029	91	0.7	0.87	194	44	126	94	9	22	6		5.6	0.29		127	80
1	64			3	1	69.4	95	104	0.43	1.15	241	47	149	152	0.8	24	19	24	2.1		27.3825	2.45	3.89	6.3	130	80	6	6301.6	3	2	1	86	26.3771	109	0.6	1.07	203	44	110	180	16	21	19		6	0.28		131	81
2	53			1	1	63.1	95	105	0.55	0.8	240	45	153	154	1.12	20	24	20	0.76		28.6139	2.78	18.48	5.1	100	60	7	8349	1	1	1	90	26.9449	121	0.5	0.78	220	49	126	108	26	27	26		7.5	0.88		126	81
1	51			1	2	68.5	95	78	0.61	1.05	210	39	126	159	0.4	28	18	19	1.16		26.8584	1.38	2.76	5.8	100	70	5.6	7312.8	1	3	1	91	25.109	86	0.7	1.03	185	39	98	194	19	19	13		5.3	0.19		111	79
2	58			1	2	53.4	84	94	1	0.73	131	31	70	90	12.95	11	24	16	1.74	12.5	22.8117	1.73	4	3.5	90	60	5.7	21342	1	1	1	84	24.2945	95	1.2	0.75	149	40	84	46	10	31	21		5.6	2.11		127	87
2	44			1	1	59.3	78	83	0.76	0.8	180	37	82	319	1.47	12	28	28	0.71		26.0767	1.53	8.51	4.4	110	70	5.7	13879	1	1	1	78	25.176	95	0.7	0.81	176	42	98	143	12	24	22		6	1.09		109	60
1	46			2	1	69.8	87	90	0.6	1	254	42	138	440	0.42	57	36	42	0.86	125	26.1428	1.86	2	7.2	120	70	5.6	6373.6	1	3	1	85	24.7873	87	0.8	0.91	194	46	112	143	60	28	27		5.6	0.18		119	80
2	50			1	2	56.4	77	96	0.69	0.91	255	61	150	83	1.06	66	30	34	1.58	3.33333	24.3153	3.38	9.83	2.3	100	70	5.9	15003	1	1	2	75.5	23.5831	84	0.74	0.87	238	60	153	99	76	55	53	3.7	5.7			100	70
1	61			1	1	57.2	77	81	0.63	0.92	203	66	105	79	0.25	16	20	17	2.03	76.4286	21.1637	0.94	0.63	4.3	110	70	5.6	12452	1	3	1	72	20.2332	84	0.8	1.04	172	59	90	55	11	29	31		5.7	0.12		117	67
2	62			1	1	34.6	64	85	0.89	0.71	180	55	94	98	10.91	12	22	12	2.4		17.1835	2.1	1.28	3.1	110	70	5.4	23870	1	1	1	62	17.1068	99	1.5	0.75	190	66	102	57	13	19	15		5.6	0.08		111	71
1	67			2	1	60.1	84	82	1	0.75	202	45	120	129	0.26	21	23	15	3.43		22.7038	1.07	1.18	4.1	120	80	5.3	10492	1	1	1	77	22.4845	77	1.1	0.89	159	34	98	80	22	18	18		5.2	0.77		130	79
2	64			1	1	51.3	90	87	0.78	0.77	200	49	115	124	0.2	12	22	9	0.72		24.8084	1.37	3.84	3.4	100	60	5.3	33142	1	1	1	83	23.667	94	0.7	0.85	166	43	100	60	11	22	16		5	0.24		98	61
2	63			1	1	56.1	79	105	0.63	0.81	244	69	139	98	0.34	24	20	23	0.88	14.2857	23.8714	2.52	9.62	4.2	110	70	5.6	23232	1	1	1	86	23.6997	115	0.73	0.78	242	77	132	89	14	21	17	3.8	5.6			118	90
1	64	4		2	2	58.7	80	84	1.55	1.01	173	52	91	96	0.74	13	31	17	2.12		21.3021	0.92	1.65	4.6	130	80	5.6	29178	1	1	1	80	21.3064	89	1.4	0.98	126	36	66	53	11	30	20		5.7	0.86		149	82
1	64			3	1	53.7	82	92	0.64	0.72	189	65	84	147	1	48	49	38	3.66	200	21.0818	0.89	1.14	4.7	110	80	6.4	7656	3	3	1	80	19.0033	98	0.57	0.84	155	39	81	112	69	40	25	5	6.9			98	68
2	60			1	1	48.9	75	81	1.15	0.85	198	66	91	140	0.29	8	27	14	0.73		21.5034	0.92	1.69	3.2	100	60	5.5	35340	1	1	1	70.8	20.2058	85	1.16	0.93	180	52	92	129	11	30	16	3.3	5.7			100	70
1	63			1	1	58.1	81	91	1.06	0.72	152	59	67	65	3.43	25	37	13	0.93		21.9753	2.18	1.69	4.4	130	80	5.2	16208	1	3	1	81	20.2235	91	2.64	0.73	98	34	28	198	61	90	35	5.5	5			130	60
1	63			3	1	56.8	78	81	1.09	0.88	201	79	91	66	0.21	11	19	15	0.7		19.654	0.57	0.56	4.2	110	70	5.6	24183	3	1	1	70	17.6401	85	0.96	0.9	157	60	67	59	12	21	18	3.9	5.6			114	70
2	65			1	1	45.5	80	90	1.85	0.66	246	44	161	144	1.49	15	25	18	0.73		21.9121	1.14	3.63	4.1	110	70	5.6	10881	1	1	1	76	20.7946	101	2.23	0.69	163	37	94	134	14	27	18	4.1	4.5			131	69
2	56			1	1	56.7	87	86	0.75	0.83	222	44	145	90	0.26	11	28	9	39.54		23.7842	1.31	7.73	4.5	120	70	5.3	16714	1	1	1	81	23.2017	88	0.9	1.03	201	46	133	87	10	35	10		5.5	0.03		126	74
1	54			3	1	60.7	87	93	0.61	0.88	272	58	169	186	4.96	40	23	20	0.72		22.7067	1.62	1.1	8.1	120	70	5.8	7613.2	2	3	1	86	22.6439	94	0.65	1	263	71	163	125	50	27	23	8.5	5.6			111	60
1	58			1	1	77.7	98	226	0.53	0.95	211	42	134	100	2.37	50	24	24	1.02		27.2049	4.82	2.49	5.3	130	80	9.5	8236.2	1	1	1	93	27.6883	152	0.5	0.89	213	49	124	160	78	33	40		7.6	0.94		136	81
2	54			1	1	72.6	88	98	1.2	0.6	176	55	89	71	2.32	32	59	29	0.77		29.8706	4.75	32.37	3.4	110	70	4.8	32108	1	1	1	90	29.9304	89	2.2	0.63	130	38	62	50	29	63	19		4.5	3.95		136	89
2	45			1	1	59.6	81	95	1.13	0.67	205	43	123	168	7.7	10	19	18	1.15		23.4274	1.5	3.99	4.9	120	70	5.6	11867	1	3	1	87	24.3797	100	0.51	0.74	197	44	110	252	14	17	16	4.7	5.8			100	70
2	66		2	1	1	50.4	87	186	0.36	0.62	287	64	180	172	2.84	29	23	22	15.68	8.33333	23.9384	2.53	5.8	3.6	110	60	11.2	14772	1	2	1	78	22.4471	110	0.5	0.62	172	61	84	69	15	18	16		9.1	1.14		130	50
2	57			1	1	78.5	99	103	0.68	0.8	233	43	149	185	0.79	18	25	27	3.7		31.7661	3	23.43	4.5	120	80	6.4	7769.2	1	1	1	94	32.258	114	0.6	0.93	193	44	119	122	14	23	24		6.8	0.28		128	76
1	65			3	1	46.7	75	85	0.59	0.89	144	52	56	123	9.27	12	42	24	3.2	71.4286	19.794	1.01	1.03	4.7	120	70	5.8	10035	3	3	1	70.8	18.8216	99	0.6	1.01	171	44	99	80	15	29	22	4.6	5.7			110	70
2	60			1	1	55.8	80	83	0.77	0.68	229	49	144	143	0.58	10	23	17	1.46		24.3435	1.99	7.27	4.1	130	80	5	8301.4	1	1	1	82	23.8902	83	0.8	0.8	197	47	120	115	9	23	18		5.4	0.29		110	72
2	55			1	1	56.7	76	94	0.62	0.83	184	54	99	74	1.15	17	30	22	0.82		23.003	1.53	10.62	3.8	110	70	5.2	10963	1	1	1	81	24.1471	87	0.6	0.87	181	39	114	78	12	27	18		6	0.79		117	77
2	48			1	1	65.2	79	77	0.97	0.57	154	50	79	69	0.74	11	28	9	0.7	5	27.3852	1.01	12.66	5.2	110	60	4.7	8658.2	1	3	2	85	27.8897	86	0.7	0.81	166	48	80	133	11	27	13		5.2	1.58		128	81
1	63		2	3	1	55.6	89	234	0.76	0.99	173	67	69	145	3.59	153	43	26	1.52	107.143	18.97	3.92	2.16	3.5	125	80	8.8	12751	3	2	1	80	18.7847	125	0.6	0.87	161	40	86	107	24	17	14		8.9	1.09		110	60
1	70			2	1	68.2	96	92	0.72	0.88	251	47	166	129	0.97	17	31	18	0.78		24.6308	1.61	3.01	5.7	100	70	5.3	15308	1	1	1	97	23.6136	105	0.53	1.1	204	45	128	77	15	33	15	7.7	6			118	78
2	53			1	1	57.3	83	80	0.97	0.83	137	42	64	111	0.29	8	19	12	0.71		22.467	2.62	4.98	2.6	120	80	4.9	13670	1	3	1	76	22.5128	83	1.2	0.84	135	48	60	72	11	17	11		5.3	0.15		120	60
2	70			1	1	48.1	75	78	0.5	0.61	218	40	123	332	1.88	15	28	23	5.09		23.4235	1.04	4.66	3.3	110	70	5.3	12280	1	1	1	77	22.2411	87	0.43	0.79	202	32	130	237	14	21	15	4.3	6			138	82
2	68			1	1	47.1	78	82	0.59	0.78	142	38	77	122	0.3	9	23	15	1.69		20.5752	1.21	2.59	3.2	120	60	5.3	14083	1	1	1	84	19.1287	84	1.1	0.93	165	45	93	101	9	26	15		5.5	0.33		117	63
1	65			3	1	53.2	79	84	0.68	0.91	204	45	136	69	0.54	15	29	20	2.05		21.1764	1.85	0.39	4.3	110	80	5.2	9573.4	3	1	1	78	20.5516	85	0.6	0.94	151	39	88	64	9	27	19		5.7	0.21		116	80
1	67			3	2	63.7	88	96	1.49	1.05	255	42	183	117	0.94	21	22	16	2.67		23.9166	1.3	1.53	4.8	120	80	5.1	9389.2	3	1	2	81	21.6373	97	2.5	1.17	217	42	142	124	10	20	11		5.3	2.39		110	70
1	49			1	1	59.6	79	105	0.43	1	196	36	133	144	0.64	21	27	23	2		22.1865	2.65	1.02	6.3	110	80	5.5	8791.5	1	1	2	80	20.7361	82	1.8	1	197	44	120	62	18	30	24		5.6	0.18		111	70
2	45			1	1	52.5	74	88	0.62	0.74	195	47	128	45	0.45	9	19	10	4.58		23.5842	1.34	4.62	3.1	110	80	5	10458	1	1	1	76	23.1241	94	0.7	0.83	198	48	116	50	11	21	12		5.5	0.01		116	73
2	53			1	1	45.6	66	84	0.76	0.7	186	59	101	36	0.21	12	22	15	0.77		18.5944	1.1	1.44	3.6	100	60	5	27332	1	1	1	59.5	16.7242	95	0.79	0.9	189	68	98	44	10	22	17	4.4	5.5			111	62
1	45			2	1	67.3	90	101	0.51	0.92	174	32	96	293	0.93	53	25	29	0.72	125	23.3696	2.99	3.52	4.8	110	80	5.5	6408.3	1	3	1	79.5	21.1477	102	0.91	1.01	186	39	106	206	40	25	24	5.7	5.8			110	81
2	42			1	1	51.1	78	90	0.66	0.72	253	61	162	139	0.23	16	15	13	0.92	67.5	21.9151	1.72	8.52	3	130	80	5.1	9405.3	1	3	1	79	22.0883	94	0.76	0.86	259	56	171	101	23	12	22	3.4	5.4			130	80
1	43			1	2	62.5	80	96	0.61	0.81	220	67	116	166	5.14	244	28	44	0.68	87.5	24.1717	1.33	1.57	5	110	80	5.2	15228	1	3	2	77	22.3819	100	0.3	1.03	133	53	46	146	55	48	35		5.6	0.11		110	69
2	49			1	1	50.6	77	80	0.7	0.82	191	52	108	98	0.14	16	22	17	0.78		22.429	0.99	3.92	2.5	110	80	5	7176.4	1	1	1	73	19.6969	91	1	0.86	216	59	123	64	15	19	24		5.5	0.14		100	70
2	60			1	1	55.2	81	102	0.49	0.87	240	47	151	162	1.13	40	20	13	2.78		22.5955	2.84	6.4	3.6	110	70	5.8	8858.6	1	1	1	80	21.6974	96	0.8	0.72	219	61	117	121	16	23	23		6.4	0.77		107	79
2	44			1	1	55.9	79	80	0.86	1.01	321	59	197	228	1.01	21	38	25	2.28		24.7454	1.59	10.17	4.2	110	60	5.4	12634	1	1	2	78	21.5295	81	0.9	0.77	245	61	143	135	25	47	38		5.5	0.85		128	69
2	61			1	2	76.3	98	89	0.65	1.02	295	59	197	82	1.8	23	30	23	2.9		33.9564	1.81	13.33	4.4	130	80	6	5792.9	1	1	2	102	34.1495	91	0.8	0.84	156	50	87	86	13	24	16		6	0.76		138	88
2	50			1	1	67	88	81	1.08	1.02	330	73	197	140	1.96	28	41	46	0.71		27.1816	2.18	14.44	5.7	130	80	5.6	11681	1	1	1	90	26.2687	88	1	0.83	244	53	145	142	14	25	19		5.7	0.17		130	89
1	70			3	1	48.9	76	93	0.25	0.98	222	37	148	115	11.17	8	22	12	0.78		19.1016	1.53	1.12	3.5	110	70	6.1	8652.7	3	1	1	71	18.1312	88	0.6	0.79	171	37	112	93	9	18	9		6.1	1.75		95	59
2	50			1	1	64.1	80	86	1.45	0.76	221	55	137	76	0.39	7	19	13	0.99		24.3644	0.96	5.63	3	110	80	5.1	17341	1	1	2	76.5	22.9757	92	1.56	0.79	228	50	158	89	12	35	43	4.1	5.3			102	78
2	65			1	1	52.1	86	81	0.65	0.81	217	71	105	126	0.36	22	34	31	0.72		22.4026	1.1	4.95	4.8	130	80	5.9	19581	1	1	1	87	20.9873	83	1.2	0.7	198	67	93	55	16	31	26		5.7	0.32		119	70
2	55			1	1	52.9	79	74	0.75	0.78	198	46	121	101	0.48	21	31	31	1.18		22.8363	1.31	5.4	4.3	125	85	4.9	10104	1	1	1	77	21.8864	79	0.9	0.73	193	41	110	161	17	26	20		5.1	0.6		111	77
2	63			1	1	43.3	78	81	0.46	0.77	166	37	93	165	0.49	17	23	16	1.59		21.5042	1.41	1.27	2.1	110	80	5.5	16915	1	1	1	75	21.055	84	0.7	0.75	155	36	75	144	9	35	19		5.4	0.26		110	69
1	53			1	1	62.9	85	76	0.65	0.94	191	33	105	285	0.3	10	26	19	0.79		22.1277	1.05	0.78	5.8	125	87	5.5	7655	1	1	2	80	21.542	75	1	0.86	260	42	183	104	12	28	19		5.6	0.34		110	80
2	47			1	1	60.5	75	76	0.51	0.89	178	62	94	46	0.29	5	23	12	0.8		23.8709	1.14	84.23	3.8	120	80	5.4	24435	1	3	1	74	22.0003	81	0.9	0.83	198	63	105	46	7	27	17		5.5	0.36		120	80
2	51			1	1	58.4	91	75	0.76	0.9	298	50	144	549	1.54	58	37	43	1.42		26.8793	1.31	10.13	4	100	60	5.4	8612	1	1	1	88	26.0894	86	0.6	0.83	297	49	153	474	37	27	32		5.6	1.91		119	82
2	57			1	1	58.5	78	88	0.97	0.81	186	39	108	213	0.09	10	26	16	2.71	71.4286	22.346	1.54	5.66	4.4	120	80	5.4	8340	1	3	1	75	21.2811	91	1.2	0.81	201	38	122	182	10	27	17		5.6	0.12		119	80
1	61			1	1	60.1	87	90	1.01	0.97	230	72	127	115	0.46	58	30	33	0.93		23.4766	1	1.2	4.6	130	80	5.9	14133	1	1	1	84	23.4067	112	0.91	0.96	207	66	114	73	82	25	23	4.5	6.3			102	70
1	62			3	1	62.4	87	96	1.3	1.13	220	68	126	75	0.59	16	26	28	6.12		22.8646	1.35	1.31	4.6	130	80	5.3	8645.2	3	1	1	79	22.2167	84	1.7	1.02	205	67	110	92	13	21	16		5.1	0.59		110	62
1	49			3	1	69.7	87	75	0.84	1.12	239	58	152	93	1.94	34	27	21	6.59	12.5	25.8515	0.91	1.73	6.3	90	60	5.3	12113	3	1	2	81	23.4572	80	1.3	1.04	228	56	139	132	16	20	13		5.4	0.64		110	66
2	46			1	1	64.3	86	81	0.9	0.81	152	61	63	72	0.27	5	27	19	0.87		27.6123	1.45	8	2.8	110	80	5.2	8846.7	1	1	1	79	27.0689	82	1.2	0.8	159	60	73	46	4	27	19		5.4	0.47		109	80
1	56			3	1	66.6	95	96	1.14	1.01	194	46	111	115	0.98	120	191	218	0.8	71.4286	23.1265	2.58	2.7	6.5	110	80	5.2	11157	1	3	1	91	23.5085	102	1.9	0.87	135	52	45	109	194	149	98		5.2	0.55		129	79
2	51			1	2	76.8	106	90	0.74	0.91	277	71	159	127	11.76	24	18	13	1.58	16.6667	30.4935	1.7	15.61	4	110	70	5	12690	1	3	1	102	30.7194	86	1.3	0.86	246	79	122	117	67	56	109		5.4	0.46		129	79
2	45			1	1	57.1	70	91	0.73	0.82	186	63	94	67	0.54	20	27	23	1.67		21.3339	1.17	3.22	3.6	110	80	4.9	13461	1	1	1	67	20.6745	79	0.51	0.7	164	60	80	50	12	25	27	3.7	5.1			112	80
1	51			3	1	64.8	82	76	0.53	0.98	163	50	72	179	0.22	30	30	22	0.98	142.286	21.135	0.48	1.04	5.6	110	70	5.3	12966	3	3	1	86.5	21.0526	76	0.47	0.95	159	51	81	78	16	30	20	5.1	5.3			100	60
1	49			3	1	61.5	84	89	0.64	1.14	152	36	43	344	0.81	125	36	34	0.9	71.4286	24.235	1.06	0.59	7.2	110	70	5.6	5234.1	3	3	1	87	25.9204	96	0.55	0.97	231	45	100	469	141	29	31	6.9	5.9			138	80
2	69			1	1	70.2	103	89	1.15	0.93	202	58	114	65	3.94	24	39	35	8.75	14.2857	34.1381	1.42	15.67	2.7	120	80	5.1	12006	1	3	1	105	33.6465	89	0.9	0.94	179	45	108	92	16	32	24		5.4	3.75		132	76
2	40			1	2	89.5	103	84	0.5	0.93	190	53	104	104	0.96	17	21	11	0.79		33.4802	1.96	12.26	4	100	70	5.3	13790	1	1	1	99.8	32.4655	87	0.49	0.92	150	43	81	60	13	22	12	5.2	5			114	76
2	67		2	1	1	58.3	81	74	0.8	0.89	214	53	118	170	2.2	19	26	21	0.81		23.0608	1.26	8.97	4.5	130	70	5.6	10081	1	1	2	81	22.6478	86	0.9	0.76	141	50	62	115	15	20	19		5.8	1.35		123	71
2	53			1	1	60.8	85	87	0.65	0.78	214	48	135	98	5	15	25	20	1.22	3.33333	26.6655	1.92	8.21	4.9	110	80	5.5	11529	1	3	1	84	25.8717	89	1.2	0.77	220	50	143	52	11	24	18		5.8	0.72		111	68
2	46			1	1	68.9	88	88	1.44	0.77	272	61	179	60	0.27	13	27	36	2.62	27.1667	29.5876	1.56	7.77	0.6	100	70	5.4	13829	1	3	1	89	30.0455	85	0.7	0.66	201	53	121	77	9	14	24		5.5	0.19		123	70
2	48			1	1	55	96	82	1.27	0.78	173	40	104	73	0.36	13	18	17	1.11	5	23.1911	1.71	3.8	4.5	120	80	5	11252	1	1	1	86	23.2507	87	0.8	0.72	189	39	112	84	11	18	16		4.9	0.27		111	71
2	44			1	2	71	86	84	0.76	1	194	38	121	112	0.4	10	22	21	1.78	35.7143	27.7344	1.28	9.15	5.3	120	80	5.2	7944.1	1	3	1	91.5	27.1511	86	0.64	0.93	210	40	142	97	11	16	13	5.9	5.6			107	76
1	44			1	1	66.4	81	90	0.55	1.05	166	34	88	190	0.66	17	32	29	0.8		25.053	1.88	0.89	5	135	78	5.7	6637.4	1	3	1	74.3	24.1907	112	0.54	1.11	159	39	81	207	30	25	17	6.2	5.4			128	90
2	57			1	1	61.1	82	115	1.01	0.83	244	42	164	151	0.49	19	25	23	3.52		24.2293	2.71	7.04	3.4	120	80	6.2	6450.6	1	1	1	83	23.3554	133	1.4	0.79	253	44	174	128	17	18	14		7	0.66		112	79
1	51			2	1	74	91	96	0.82	1.01	260	68	139	222	0.56	48	50	57	158.39	20.8333	25.3069	2.03	2.65	6.4	110	70	5.9	6267.8	1	3	1	90.5	24.7492	95	0.7	0.93	226	62	132	114	24	38	41	6.5	5.8			118	81
2	68			1	1	50.1	88	81	0.47	0.78	219	39	131	236	2.35	17	24	21	1.96	4.16667	24.2619	2.71	4.26	5.4	110	60	6.2	8005.6	1	1	1	84	23.9286	83	0.5	0.72	195	35	106	222	21	25	24		6	2.18		131	82
2	58			1	2	61	78	94	0.86	0.73	162	42	83	133	1.22	34	93	81	7		24.4661	2.37	5.88	4.1	120	70	5.5	18323	1	1	1	86	24.5759	96	0.8	0.7	177	46	102	115	18	33	29		5.7	0.39		124	71
2	49			2	1	64.4	81	89	0.58	0.91	282	57	187	123	1.03	29	52	63	2.65	6.66667	27.4032	3.09	12.51	3.8	115	70	5.9	9940.9	1	1	1	83	27.5987	90	0.9	0.86	288	63	187	123	25	29	20		5.9	0.32		109	69
2	59			1	1	65.5	98	90	0.71	0.89	223	54	133	142	1.06	76	30	31	8.1		28.6509	2.05	22.47	3.1	110	60	5.6	19783	1	1	1	95	27.1719	98	1.2	1.01	271	50	178	91	38	25	21		5.7	1.45		149	100
1	53			1	1	63.2	80	90	0.65	0.9	197	50	112	148	0.81	54	42	32	1.81	77.5714	23.0739	1.46	1.91	4.5	130	80	5.9	20476	1	3	1	89	24.2715	110	0.3	0.93	198	54	106	118	97	32	33		5.9	2.22		117	71
2	45			1	1	53.2	74	82	0.65	0.8	167	57	78	104	0.31	13	27	19	0.83		22.667	1.95	10.63	5	120	80	5.5	9093.5	1	1	1	86.5	21.5992	69	0.71	0.75	136	51	58	47	16	21	14	4.1	5.2			112	72
2	48			1	1	53.2	84	85	1.38	0.77	185	47	108	92	0.42	13	21	14	0.78		23.9951	1.15	4.79	3.7	100	60	5.5	18254	1	1	1	78	23.5892	85	1.4	0.72	196	42	124	155	14	19	13		5.6	0.31		122	69
1	64			3	1	65.2	84	88	1.53	1.12	231	36	151	204	0.51	14	22	12	0.87		23.604	1.15	1.43	5.1	110	70	5.4	5653.2	3	1	1	78	22.545	89	2	1.02	210	42	134	172	12	16	13		5	0.29		112	74
2	65			1	1	46.4	75	86	0.82	0.89	192	49	114	39	0.32	9	39	52	0.82		19.2883	0.96	2.74	3.2	110	80	5.7	22750	1	1	1	70	17.3407	106	0.7	0.87	180	50	101	52	8	25	18		6	0.12		117	69
2	61			1	1	49.5	82	86	0.66	0.88	241	85	121	77	0.59	7	26	17	1.48		23.0323	1.79	5.91	3.5	100	60	5	24499	1	1	1	78	24.6367	87	0.8	0.82	213	59	126	94	14	22	17		4.8	2.35		111	81
2	41			1	1	56	83	81	0.77	0.97	174	50	87	147	0.22	9	22	14	1.53	5	26.0567	1.61	4.2	3.5	110	60	5.1	14038	1	3	1	89	26.0567	88	0.9	0.94	160	45	87	88	12	15	11		5	0.26		102	62
2	44			1	1	51.7	72	81	0.89	0.75	193	37	120	138	0.26	11	24	18	1.11		21.7431	1.63	3.83	3.1	100	60	5.1	12189	1	1	1	70	21.8575	85	0.9	0.75	160	33	103	102	12	21	16		5.2	0.32		105	76
1	65			1	1	55.9	77	85	0.52	0.85	188	46	111	95	0.47	9	28	17	0.76		22.2231	0.82	0.91	3.4	110	70	5.7	4945.4	1	1	1	73	20.7469	77	0.7	0.73	187	55	102	61	10	34	23		5.7	2.46		118	72
2	48			1	1	46.9	76	79	0.51	0.92	146	43	79	39	1.03	7	25	15	5.73		21.9421	1.07	4.21	3.6	110	80	5.1	16623	1	1	1	71	21.3278	70	1	0.86	182	57	97	49	6	27	15		5.2	0.69		127	80
1	54			3	1	75.5	95	98	0.75	1.14	194	36	109	221	0.93	59	24	24	2.69	125	26.1861	1.85	1.69	5.5	110	60	5.9	4061.7	3	3	2	92	25.3477	103	0.8	0.99	193	43	105	241	37	23	20		5.8	0.66		130	82.5
2	40			1	1	59	74	88	0.56	0.72	153	60	64	77	0.16	9	21	13	1.02		26.6111	1.75	9.34	3.8	120	80	5.3	14252	1	1	2	81	24.8954															119	78
1	49			3	1	71.8	91	83	1.43	0.99	197	58	111	62	12.97	22	22	17	1.06		24.4686	3.02	1.89	5.4	100	60	5.7	19106	3	3	1	89	23.4878	84	1.65	1	172	42	101	91	36	24	16	7.3	5.7			104	81
1	72			3	1	52.8	80	82	0.72	1.04	157	45	87	82	1.72	20	28	15	1.33	6.66667	20.2939	0.91			90	60	5.6	18002	3	3	1	68	18.7573	81	0.66	0.97	154	42	80	87	19	27	15	5	5.4			100	70
2	53			1	1	61.3	86	91	0.68	0.99	218	55	133	72	0.34	10	20	15	1.35		25.5151	1.43	8.23	4.4	120	80	5.9	3960.7	1	1	2	81	26.8677	95	0.53	1.02	188	41	121	116	11	20	18	5.5	6.2			129	80
2	47			1	2	60	86	80	0.69	0.87	217	43	143	54	0.19	16	30	31	0.82		24.3418	0.99	8.04	4.2	110	70	5.3	6806.6	1	1	1	79	22.2359	80	0.6	0.94	201	56	124	50	6	31	25		5.7	0.03		121	71
1	52			3	1	65	88	102	0.72	1.07	243	43	144	205	0.65	82	46	52	1.19	29.1667	24.4646	1.86	5.42	6.4	110	70	5.2	7595.3	3	3	1	80	20.3748	92	0.5	1.07	211	51	133	67	9	26	21		5.6	0.04		110	80
1	60			2	2	61.5	62	86	0.92	0.86	117	37	52	45	2.49	15	34	18	1.43		22.7271	0.96	0.97	4	120	80	5.6	4655.6	3	1	2	87	23.5787	90	0.7	0.87	122	33	62	117	16	30	29		6	0.6		123	71
2	59			1	1	54.2	80	84	1.34	0.85	208	42	120	174	0.21	8	29	18	0.83		21.9607	1.3	4.26	4.5	110	70	5.3	5671.7	1	1	1	75	21.2312	84	1.4	0.83	197	54	120	62	9	23	17		5.7	0.2		120	77.5
2	52			1	2	58.5	76	81	0.65	0.73	208	45	124	86	0.42	9	19	10	2.62		22.8802	1.06	5.09	3.1	100	70	4.8	7306.6	1	1	2	75	20.4106	72	0.7	0.69	236	60	149	70	6	19	12		4.8	1.15		110	79
1	63			3	1	59.1	82	89	0.49	1.01	203	40	112	220	1.66	31	42	29	33.88		19.8844	1.79	1.1	5.5	130	80	5.5	5059.1	3	3	1	80	17.4553	90	1.2	1.03	198	61	98	124	20	43	20		5.5	0.77		119	77
2	47			1	1	47.8	85	87	0.7	0.72	236	33	162	84	15.8	9	22	11	1.62		21.4729	1.14	5.16	2.5	110	60	5.5	8259.6	1	1	1	74	21.8616	78	0.62	0.74	216	33	144	261	14	24	19	3.2	5.8			102	72
2	61			1	1	48	73	85	0.93	0.9	248	40	159	130	0.36	13	24	13	0.94		22.5183	1.2	5.31	5.3	120	70	5.4	22196	1	1	1	76	20.5753	89	0.8	0.87	194	44	111	130	10	29	16		5.6	0.32		101	70
2	43			1	2	64.5	80	83	0.85	0.75	127	30	65	84	0.16	12	22	18	1.42	1.66667	24.9142	2.46	5.89	3.3	90	70	5.2	5035.8	1	3	2	84	25.9106	76	0.8	0.74	157	36	87	102	16	37	33		5.1	0.35		91	60
2	69			1	1	56	84	104	0.67	0.93	193	46	105	119	0.74	10	23	19	1.1		23.9224	2.22	18.17	3.7	130	80	5.6	16526	1	1	1	77	24.0182	105	0.8	0.95	151	40	80	151	13	21	15	5.3	6.2			122	82
1	63			1	1	68.2	90	85	0.89	1.03	175	32	95	187	0.31	35	25	31	1.46		23.7101	1.2	2.08	6.4	110	70	5.4	3702.8	1	1	2	90	23.793	85	0.8	0.91	163	35	97	132	26	18	19		5.6	0.36		128	82
2	60			1	1	51	84	97	0.56	0.84	276	46	168	184	0.55	10	23	15	13.38		23.6013	1.86	5.17	4.4	130	70	5.8	18173	1	1	1	75	21.3509	90	0.5	0.82	220	50	132	154	5	19	13		5.9	1.07		120	80
2	64		2	1	1	68	92	73	0.58	0.84	231	65	108	212	6.14	23	21	21	5.9		29.4321	0.46	16.43	4.9	130	70	8.4	7003	1	1	1	93.5	29.307	164	0.58	0.98	160	38	91	124	13	19	16	5.7	7.8			128	70
1	39			3	1	56.4	75	89	1.07	1.1	264	41	163	197	4.57	19	23	29	1.22		19.8882	1.32	0.65	4	100	60	5.6	8638.7	3	1	1	75	19.5578	87	0.94	1.09	252	40	186	138	17	18	17	5.1	5.7			96	70
2	49			1	1	60	82	290	2.62	0.82	236	38	159	95	1.69	39	38	41	3.35		25.2994	8.37	6.98	2.2	120	70	10.6	7800.8	1	1	1	96	26.9931	170	4.4	0.77	136	48	68	75	78	68	70		7.9	31.03		125	69
2	65			1	1	60.9	90	92	0.75	0.78	217	33	133	271	0.93	20	28	33	6.88		29.492	2.54	9.5	4.3	100	60	5.7	12959	1	1	1	93	31.2438	96	0.6	0.77	207	42	121	297	28	30	39		5.4	2.26		121	82
2	69			1	1	51	79	84	0.49	0.97	268	40	182	188	0.19	20	21	23	1.17		22.6667	2.1	7.49	3.5	135	85	5.4	9622	1	1	1	82	21.2362	81	0.7	1.01	246	42	165	127	11	27	26		5.6	0.38		141	74
2	69			1	1	52	81	80	0.32	0.93	218	37	116	302	2.3	25	24	19	1.2		24.3948	3.16	6.98	5.8	105	70	5.6	9185.4	1	1	1	92	24.0952	80	0.4	0.79	170	37	88	267	25	24	17		5.8	2.09		117	68
2	64			1	1	55.9	71	85	0.68	0.81	210	46	122	87	0.94	19	24	17	1.92		23.2374	1.79	8.04	4.1	110	70	5.2	15922	1	1	1	74	22.7273	77	0.9	0.86	199	45	110	153	20	23	15		5	0.31		121	80
1	44			3	2	65.2	84	104	0.75	1.19	207	37	115	234	0.66	140	32	35	1.55	125	24.752	1.79	2.33	5.5	120	70	5.8	6092.4	3	3	2	84.5	23.1861	99	0.65	1.03	207	46	130	90	51	25	23	4.5	5.8			102	70
2	48			1	2	56.3	73	76	0.73	0.81	215	35	138	89	0.81	28	47	64	0.79		24.4646	1.29	8.23	4.7	130	70	5.5	6188.8	1	1	2	75	23.4583	80	0.8	0.91	218	49	132	142	28	21	18		5.6	0.35		122	71
2	65			1	1	69	94	88	0.79	0.94	237	47	135	186	0.58	16	20	20	2.08		29.0943	3.39	21.68	4.8	110	80	5.2	7926	1	1	1	92	27.0772	90	1.1	0.94	230	43	141	200	15	13	12		5.4	0.6		132	82
1	42			1	1	66	82	85	0.41	1.02	201	43	109	144	1.56	68	25	24	1.02		23.3844	1.88	1.61	3.9	110	70	5.8	14792	1	1	1	78	22.8954	91	0.5	1.05	170	50	85	116	51	19	14		5.5	0.58		122	71
2	41			3	1	54.4	70	78	0.77	0.87	279	59	168	110	0.11	20	19	16	2.44	3.33333	20.6775	1.78	7.36	4.1	100	70	5.4	12767	2	3	1	76	21.4525	87	0.6	0.79	232	57	134	119	15	20	13		5.4	0.31		105	72
1	54			3	1	58.2	81	94	0.43	0.97	151	35	75	112	2.06	34	30	26	1.38	29.1667	19.6499	2.12	2.86	8.6	95	65	5.5	7887.3	3	3	2	81	18.7775	88	0.4	0.96	151	56	56	125	89	29	23		5.4	2.12		108	62
2	43			1	2	55.2	75	90	0.64	0.9	179	42	92	134	0.31	13	25	27	0.76		25.235	1.86	10.41	3.9	100	60	5.2	13236	1	3	1	76	21.2123	87	0.9	0.98	184	59	104	52	12	16	15		5	0.45		119	87
1	47			3	1	63.3	86	100	1.11	0.96	164	32	68	325	3.53	109	28	28	1.96	89.2857	23.8833	1.38	1.85	7.2	130	80	4.8	6878.8	2	3	1	88	26.5741	114	2.2	0.85	139	43	58	224	190	19	21		4.6	42.47		121	69
2	44			1	1	89	101	87	1.66	0.84	217	36	138	110	5.91	37	29	25	2.2		31.9122	3.9	16.59	4.8	100	60	5.3	3252.8	1	1	2	93	28.7165	86	1.2	0.87	174	38	105	80	9	29	26		5.3	0.61		112	78
1	54			3	2	73.7	89	103	0.52	1.07	173	32	84	323	1.38	55	34	40	0.85	58.3333	26.6812	4.15	5.41	6.7	120	70	5.7	4391.8	3	3	2	89	25.046	91	0.5	1.05	152	33	84	162	40	27	33		5.6	1.14		110	71
1	65			2	2	64.4	90	97	0.86	1.05	169	53	70	182	0.48	51	27	32	6.73	125	27.2608	1.93	4.39	7.6	110	70	5.3	7319.3	1	3	2	92	26.6485	99	0.86	1.02	141	47	67	85	15	25	25	6.4	5.4			138	70
2	67			1	1	49.4	72	88	1.37	0.88	260	49	166	203	0.95	64	25	20	0.83		23.3026	1.64	8.9	5.4	130	80	6.5	11264	1	1	1	76	21.9608	96	1.3	0.87	179	53	98	111	42	22	18		6.4	0.59		119	72
1	53			3	1	58.7	84	92	0.78	1.05	183	37	111	115	1.86	77	25	23	0.79	53.5714	22.7021	1.2	1	6.4	110	70	5.4	7211.6	3	3	1	83	20.2521	84	0.5	0.82	151	43	77	90	23	22	15		5.7	2.61		110	76
2	51		2	1	2	50.4	74	107	1.06	0.75	164	52	77	107	3.61	57	67	51	1.33		21.9297	2.52	3.14	3.1	110	70	10.5	15690	1	1	1	72	20.8312	142	2.2	0.76	161	50	84	104	44	50	40		8.1	1.03		115	64
2	48			1	2	53	74	87	0.73	0.72	159	41	92	55	0.02	9	17	15	1.39	21	22.3478	1.62	3.9	3.5	100	60	5	13795	1	3	2	77	21.5749	86	0.7	0.66	167	46	94	68	12	17	18	4.4	5.9			108	60
1	51			1	1	66	81	92	1.23	1.01	171	48	84	63	0.42	23	23	22	2.2		24.2131	2.37	2.17	5.4	120	80	5.2	8795.7	1	1	1	86	23.4876	82	0.9	0.99	159	49	80	86	16	19	16		5.3	0.44		118	67
2	48		2	1	1	58	74	109	0.43	0.82	206	30	130	117	0.11	8	23	21	0.81		23.4407	2.93	6.63	3.1	125	80	6.1	6863.3	1	1	1	79	22.5525	131	0.4	0.78	207	29	137	195	12	21	18		7.3	0.26		123	69
2	65			1	2	53.5	73	78	0.62	0.81	247	41	139	269	0.25	9	23	18	1.07		23.495	2.31	7.62	2.5	100	60	5.2	13472	1	1	2	74	21.8301	81	0.7	0.77	190	42	107	178	6	17	10		5.1	11.95		106	62
2	47			1	1	57.4	71	85	1.28	0.81	197	55	103	53	0.12	8	25	22	0.84		22.0619	1.4	3.49	3	110	85	4.9	10778	1	1	1	74	20.7798	79	1.2	0.84	180	56	99	53	5	21	16		5.1	0.19		102	62
2	58			1	1	53	76	89	0.87	0.87	230	66	121	71	0.38	16	45	52	50.1		21.7505	1.75	3.77	3.6	120	70	5	20051	1	1	2	78	19.2143	93	0.9	0.8	190	60	103	91	10	19	13		4.8	0.86		125	80
2	56		4	1	2	63.6	87	82	0.56	0.71	168	32	98	101	0.63	20	25	48	0.72	15	27.0981	1.87	6.49	3.9	120	70	5.9	7827.4	1	1	2	88	26.6326	100	0.6	0.77	240	36	160	213	20	25	34		6.3	0.91		118	67
1	52			3	1	76	92	91	0.94	1.09	240	36	125	448	0.54	80	48	71	11.18	125	26.1436	3.11	2.01	4.9	110	70	5.8	4620.1	3	3	1	91.4	25.0069	98	1.1	1.06	225	36	147	276	43	31	37	4.9	5.7			112	70
2	53			1	2	58.6	74	91	0.49	0.87	232	43	136	122	26.92	12	24	24	1.38		24.677	1.96	9.08	3.7	130	85	5.5	16872	1	1	1	78	25.0401	89	0.8	0.82	193	42	117	153	11	17	13		5.5	0.63		142	82
1	53			1	1	67.3	92	86	0.89	1.04	155	38	85	47	0.16	28	43	27	0.8	11.6667	25.8991	2.73	1.92	4.8	110	80	5.2	9841.2	1	3	1	90	25.9314	86	1	0.99	160	45	92	58	47	29	20		4.7	0.42		111	83
2	47			1	1	68.2	80	95	0.63	0.87	163	37	89	147	0.09	18	17	22	0.77	5	25.7321	3.64	9.35	4.1	115	80	5.2	4768.4	1	3	1	85	25.1662	95	0.8	0.76	163	41	97	166	23	22	33		5.1	0.35		110	78
1	61			1	2	50	77	86	0.72	1.06	198	33	120	130	3.32	41	22	22	0.75		21.6128	1.08	1.4	4.5	120	80	5.1	7981.2	1	1	2	75	20.4398	84	0.7	0.91	217	42	140	105	16	17	13		5.2	4.75		120	70
2	40			1	1	55.6	74	91	0.92	0.92	173	39	99	71	0.41	10	18	16	0.79	4.66667	24.1923	3.33	16.28	4	110	80	4.6	7150	1	1	1	77	25.4441	102	1	0.87	180	42	118	61	11	16	12		4.5	1.78		111	66
2	65			1	1	65.2	95	98	1.15	0.84	261	57	148	156	1.32	44	24	18	1.45		27.7436	1.45	15.21	4.4	100	70	5.7	12439	1	1	1	91	26.7567	95	1.3	0.85	269	54	162	237	33	23	21		5.6	0.92		138	88
2	40			1	1	57.9	76	96	1.08	0.83	214	60	110	67	5.4	9	21	16	1.95		21.9536	2.56	8.03	5.8	95	60	5.2	11402	1	1	1	79	22.4952	89	0.8	0.85	223	56	133	123	7	22	18		5.6	1.47		108	80
2	43			1	2	58.9	78	149	0.55	0.98	161	28	94	101	1.68	14	20	22	1		24.453	2.57	6.4	7.2	120	85	8.7	3541.2	1	1	2	76	22.6555	128	0.4	0.92	210	35	145	112	11	15	16	5.6	7.9			110	70
1	66			2	2	72	90	93	1.29	1.22	213	43	123	123	0.22	9	40	32	0.79	45	26.3504	1.6	2.47	5.6	125	85	5.6	11840	1	3	2	94.2	25.9059	96	1.5	1.43	200	36	130	189	13	24	19	7.3	5.8			118	70
2	57			1	1	55.3	76	85	0.85	0.94	218	50	119	68	0.69	49	29	33	1.09	12.5	22.18	1.13	6.31	4.6	120	80	5.1	15344	1	3	1	84	23.0343	81	0.8	0.89	232	43	147	129	20	25	17		4.9	1.21		128	90
2	60			1	1	59.4	80	82	1.04	0.83	202	58	98	69	11.6	26	40	25	6.36	71.4286	24.9491	0.97	7.8	4.5	125	80	4.8	7405.8	1	3	1	88	24.8777	89	1.1	0.83	194	59	100	82	13	20	14		4.9	3.16		131	91
2	67			1	1	53.9	84	90	0.88	0.85	226	39	127	155	1.36	24	28	28	0.66		24.3435	2.27	7.77	3.9	135	80	5.8	13324	1	1	2	81	23.1411	93	0.7	0.94	188	37	126	84	20	18	8		6.1	1.46		120	67
2	49			1	1	54.6	67	84	1.34	0.82	215	47	112	177	0.12	9	22	19	1.49		22.2359	1.85	7.39	3.5	90	50	5.1	15298	1	1	1	74	21.0388	89	1.2	0.86	238	46	156	112	10	23	18		5.5	0.06		110	70
2	67			1	1	56	82	86	0.81	0.93	213	51	117	79	0.49	12	22	13	0.8		23.6128	1.23	4.14	3	120	80	5	12777	1	1	1	80	22.5221	102	0.9	1.06	227	55	133	100	15	20	15		5.8	0.71		107	77
2	40			1	2	53.1	66	91	2.37	0.65	172	58	74	72	0.52	10	29	28	0.78		21.2169	1.48	3.71	4.2	120	75	4.7	18315	1	3	2	73	21.5996	92	1.7	0.7	174	54	92	66	11	18	20		5.3	0.4		120	80
2	48			1	1	74.7	90	81	0.6	0.85	225	36	139	86	6.33	11	18	12	1.58		32.2896	4.5	23.99	4.7	120	75	5.3	4627.7	1	1	1	95	32.5904	92	0.5	0.79	207	39	125	120	14	17	16		5.9	7.46		125	79
1	51			1	1	76.2	92	106	0.87	1.2	285	33	178	196	1.93	28	35	48	2.01		28.228	4.19	5.34	4.8	120	70	6.1	4267.8	1	1	1	94	27.8349	110	0.8	0.69	182	33	97	224	33	37	52		6.6	0.71		135	80
1	69			3	1	49.3	85	90	0.73	1.32	202	51	94	136	2.77	55	39	36	4.1	11.6667	18.9486	0.94	1.37	8.2	110	70	5.1	7494.5	3	3	1	79	20.7037	74	0.6	1.2	197	42	110	202	28	25	13		5.3	2.18		150	80
1	51		2	2	2	82.6	98	109	0.71	1.33	233	40	135	139	2.99	113	85	68	1.09		28.615	2.04	3.46	6.8	110	80	6.8	4731.2	1	1	2	97	27.7835	115	0.6	1.34	224	37	156	104	76	18	28		7.6	3.31		111	67
2	51			1	1	61.2	77	78	0.81	0.8	254	52	147	75	0.44	16	31	28	5.75		24.1168	1.21	8.7	4.3	110	80	5.3	9725.2	1	1	2	83	23.7742	81	0.6	0.72	205	50	123	117	11	25	20		5.6	0.33		117	67
2	56			1	1	56.4	79	98	0.43	0.77	261	46	151	245	2.88	26	24	19	1		26.7146	2.33	13.62	4.1	130	80	5.8	7718.3	1	1	1	79	24.6778	106	0.5	0.72	203	46	116	68	19	26	19		6	3.84		120	80
1	44		2	2	1	94.9	96	110	0.43	1.09	232	41	142	126	2.26	138	88	64	1.22	125	29.952	8	3.82	7.5	130	85	5.9	4768.8	1	1	2	94	29.1228	115	1.1	1.04	179	35	106	244	85	72	43		6.1	4.3		118	67
2	45			1	2	67	79	87	0.5	0.84	221	47	129	83	0.35	10	26	27	1.31	9	26.737	2.17	15.35	4.1	120	80	5.1	11476	1	3	2	85	25.4371	96	1.1	0.83	199	42	122	79	8	15	13		5.5	0.38		132	96
2	52			1	1	45	72	104	0.97	0.81	275	56	174	62	0.07	8	24	15	0.83		20.2694	2.4	5.54	3.8	100	70	5.5	12404	1	1	1	68	19.676	91	0.9	0.74	247	55	168	117	27	35	49		5.1	0.49		112	63
1	41			2	2	79.1	90	87	0.31	0.94	158	38	78	104	0.46	48	33	27	1.62	180	28.1262	1.79	3.81	8.1	110	60	5.4	6603.9	1	3	2	90	26.2738	83	1.4	1.02	185	51	105	74	46	25	22		4.9	0.73		113	68
1	46			2	2	75.3	86	89	1.21	1.08	338	55	228	110	1.05	63	39	50	2.36		25.9942	1.25	2.94	6.1	110	80	5.2	11726	1	1	2	87	25.3892	92	1.9	0.98	270	54	193	120	31	36	35		5.1	0.84		121	71
1	67			1	1	52.7	87	71	0.5	1.05	169	47	80	89	1.18	28	29	20	1.56		19.4988	0.95	1.02	5.5	105	60	5.2	16977	1	1	1	76	19.4385	84	0.56	1.03	123	38	62	124	17	18	13	5	5.6			110	68
1	64			2	1	60.2	84	132	0.57	1.12	209	28	120	238	1.36	43	73	107	49.74		24.5478	1.92	2.32	4.7	100	70	7.6	4361.3	3	1	1	84	24.2819	115	0.9	1.04	104	24	52	179	13	41	49		7.4	0.49		109	76
2	63			1	1	54.7	79	79	0.66	0.99	181	41	99	82	2.08	10	28	19	0.79		24.5068	1.09	9.43	5.3	130	80	5.7	25346	1	1	1	82.1	23.3732	86	0.71	0.95	149	35	101	90	13	25	17	4.5	6			150	78
2	48			1	1	53	75	77	0.35	0.8	223	47	135	57	1.05	7	21	16	1.64		23.0002	1.12	5.05	3.6	110	70	5.2	13480	1	1	1	81	23.9431	85	0.5	0.88	217	46	146	124	5	15	15		4.8	0.71		119	86
2	45			1	1	54.6	69	82	0.51	0.82	143	34	60	155	0.11	6	20	13	1.88	62.8571	22.8441	1.49	5.02	3.3	110	70	4.9	11094	1	3	2	72	21.8522	82	0.9	0.72	155	47	87	79	8	17	11		4.9	0.15		100	71
2	44			1	2	48	66	86	0.8	0.83	144	50	59	49	0.04	12	20	15	1.3	22	20.1348	1.27	6.19	2.9	110	70	5.1	17473	1	3	2	75	20.5146	79	1	0.81	130	47	57	55	8	22	16		5.3	0.07		109	67
1	67		2	3	1	66.6	96	147	0.89	0.99	177	37	98	63	0.58	29	28	25	1.55		26.0156	2.78	1.93	2.4	130	75	7.8	5981.9	3	1	1	93	24.9139	136	0.6	0.93	188	42	115	68	28	22	22		7.3	0.43		112	70
2	62			1	1	52.2	78	98	1.25	0.8	289	42	188	80	2.73	13	21	14	0.93		23.262	1.71	6.47	4.9	125	80	5.6	14891	1	1	1	78	21.6	91	0.9	0.77	206	47	129	100	14	20	18		5.6	0.3		137	82
2	61			1	2	66.2	87	89	0.88	1	232	51	132	96	0.26	18	25	20	0.9		28.0592	1.68	6.34	4.1	110	70	5.5	19819	1	1	1	80	26.7768	82	0.8	0.85	211	54	124	116	10	22	18		5.5	0.17		122	70
2	66			1	1	77.8	102	90	0.51	0.93	202	51	102	96	0.94	43	93	90	1.18		31.4829	4.78	31.74	5.4	118	70	5.8	9975.9	1	1	2	100	30.9941	90	0.5	0.91	176	54	88	114	50	50	44		5.8	1.09		86	40
2	52			1	1	53.4	77	81	0.89	0.88	236	39	143	148	2.49	13	25	18	0.78		24.9149	1.1	11.24	4.7	100	61	5.5	8075.5	1	1	1	83	25.673	86	0.9	0.88	251	48	164	152	14	18	11		5.4	0.7		90	54
2	41			1	1	61.3	83	91	0.44	0.77	185	38	107	61	0.31	9	18	13	1.98	90	25.9485	2.3	8.75	4	110	80	5.3	10853	1	3	2	85	24.5523	87	0.8	0.73	174	47	95	126	12	19	18		5.4	7.15		110	69
2	43			1	1	53	67	78	0.77	1.03	197	51	104	51	1.12	17	25	25	0.82	15.6667	22.9398	1.21	3.69	4.5	110	65	5.1	9003.9	1	3	2	72	21.0994	87	0.7	1.04	204	64	116	51	18	18	13		4.9	0.46		100	58
2	48			1	1	58.7	75	78	1.01	0.82	198	38	113	109	0.6	8	21	19	4.54		21.7187	1.12	6.54	3.6	110	75	4.8	9867.4	1	1	1	73	21.3967	80	1.3	0.78	194	41	134	101	9	21	13		4.7	0.38		109	80
2	43			1	2	55.1	70	90	1.17	0.79	175	41	92	76	0.19	13	26	24	2.62	14.6667	21.3895	1.92	5.57	4.5	100	70	4.8	10825	1	3	2	75	19.9576	92	0.8	0.83	155	43	85	117	9	15	10		4.8	0.41		97	77
2	43			1	2	59.9	87	104	1.59	0.8	245	34	158	126	0.15	20	27	26	2.33		26.4456	2.04	6.63	5.6	110	80	6.3	10018	1	1	2	86	25.0333	111	1.5	0.81	227	39	147	239	17	19	15		6.2	0.3		115	65
1	44			1	2	84	100	81	0.91	0.97	138	34	59	134	1.02	17	25	26	1.62		29.3066	1.39	3.62	6.7	120	80	5.1	14036	1	1	2	97	29.1646	84	1.1	1.06	149	37	83	127	14	20	18		5.1	2.26		128	88
2	69			1	1	68.7	98	93	0.66	0.78	231	60	115	141	1.97	13	23	19	1.78		29.2329	2.53	9.49	3.4	130	80	5.6	14846	1	1	1	90	27.7113	87	0.7	0.78	214	66	117	109	26	21	21		5.4	2.35		129	69
2	47			1	2	58.8	76	89	0.95	0.81	174	35	101	75	0.21	16	23	21	5.24		24.5061	2.5	9.03	3.9	130	85	5.1	11353	1	1	2	82	23.272	83	1	0.75	152	39	77	126	14	23	24		5.1	0.3		138	80
1	54			1	1	61.5	87	83	0.81	0.94	165	44	80	61	3.21	8	21	15	0.86		23.2327	1.03	1.31	4.5	130	80	5	12907	1	1	1	85	23.3355	89	1.04	0.98	165	59	76	66	32	27	22	4.9	5.3			120	70
2	64			1	1	53.9	81	86	0.81	0.94	197	42	128	102	0.64	5	16	12	1.16		21.756	1.54	4.54	4	120	60	5.2	8669.7	1	1	1	76.6	20.595	89	0.8	0.95	191	43	115	83	11	17	11	4.1	5.4			124	82
2	65			1	1	65.2	93	91	0.51	0.89	186	40	114	183	1.27	11	17	18	0.79		27.8162	1.19	5.32	3.4	120	80	5.6	16660	1	1	1	94.3	27.3905	97	0.61	0.84	215	37	143	133	12	14	17	3.6	5.3			130	69
2	69			1	1	46.6	70	91	1.01	0.96	244	49	160	162	0.52	12	23	24	1.26		20.1167	1.39	2.81	5.2	110	70	5.9	7783.1	1	1	1	71	18.9493	106	0.6	1.06	238	48	152	177	17	26	28		5.6	0.49		112	58
2	63			1	1	59.4	88	89	0.61	0.79	229	42	141	207	1.81	13	19	18	1.08		23.5255	1.12	5.28	2.8	100	60	5.7	14764	1	1	1	83.3	22.7011	90	0.58	0.81	197	50	113	89	14	20	17	2.7	5.8			100	70
1	56			1	1	74.5	90	106	0.89	1.14	217	39	137	154	0.31	32	21	24	8.89		25.9922	2.19	2.5	4.6	129	74	5.9	6818.1	1	1	1	90	25.2195	101	1.2	1.1	239	41	153	197	33	25	32		5.8	0.35		122	71
2	62		2	1	1	53.2	80	103	0.99	0.75	228	52	127	219	0.42	17	24	25	1		23.4253	1.8	8.36	4.1	130	80	6.8	9958.2	1	1	2	84	22.5163	117	0.9	0.68	199	48	106	189	15	23	19		6	0.51		116	68
2	55			1	1	78.2	94	88	0.68	0.87	216	40	139	160	1.14	49	27	27	0.89	92.8571	31.0494	1.71	9.69	4.5	105	80	5.6	9152.4	1	3	1	95	29.7024	86	0.51	0.83	168	33	102	133	15	21	17	3.6	5.5			98	68
1	64			3	1	54.2	75	86	0.62	0.94	212	56	125	105	2.55	71	17	21	0.83	161.667	20.6523	1.15	0.86	5.9	130	80	5.6	6097.3	3	3	1	78	20.6125	84	1.1	0.91	190	47	114	115	38	16	21		5.2	0.71		106	70
1	57			1	2	59.6	79	81	3.14	1.13	163	39	79	81	3.17	32	201	145	0.91		19.7082	2.48	1.04	4.5	100	70	4.3	23757	1	2	2	76	16.5484	89	0.7	1.56	137	46	58	105	25	18	11		4.6	0.48		106	71
2	47			1	1	59.6	81	89	0.56	0.81	182	31	110	182	3.05	27	22	16	2.54	29.1667	24.7117	2.42	20.6	4	100	80	5.6	3847.1	1	3	1	83	23.3963	86	0.6	0.79	213	34	137	158	38	24	20		5.5	2.04		102	69
2	61			1	1	58.2	94	94	0.65	0.77	267	50	158	243	0.65	18	21	19	34.12	75	26.4988	1.8	9.93	5	120	80	5.9	10763	1	3	1	86	24.7951	89	0.5	0.67	165	42	79	171	19	18	18		6	0.96		102	60
2	65			1	1	47	74	85	1.25	0.88	183	41	111	89	1.42	7	30	14	4.66		19.5377	0.91	3.69	3.6	130	80	4.9	19897	1	1	1	70	17.4921	85	0.7	0.93	139	42	72	69	8	27	13		4.9	1.84		129	69
2	61			1	2	55.4	80	89	0.64	0.91	214	50	127	119	0.21	35	22	19	1.13		23.947	1.27	8.19	2.8	130	80	5.3	19459	1	3	2	84	23.6444	91	0.7	0.91	239	56	139	266	76	30	34		5.3	0.53		125	66
2	65		1	1	1	64	96	92	1.01	0.85	253	46	164	110	2.53	19	28	28	6.86		28.6734	1.54	7.37	3.7	100	70	5.8	10506	1	1	1	93	28.1075	89	0.91	0.85	227	40	140	178	17	28	30	4.7	5.8			141	78
2	46			1	1	63.1	78	83	0.7	0.86	194	60	104	62	0.36	7	19	12	0.82		24.3735	1.37	13.46	4.5	110	80	5	16629	1	3	1	78	24.3046	89	0.8	1.04	175	38	106	87	16	27	18		5.4	4.25		112	68
1	66			3	1	54.3	71	73	0.76	0.9	123	40	52	59	11.58	20	25	16	0.82		20.2135	0.78	0.5	5.1	110	80	5.3	16081	3	1	2	72.5	20.2009	97	0.42	1.04	98	33	38	77	21	18	11	5	5.8			110	70
2	50			1	1	53.5	76	91	0.77	0.92	173	33	102	124	0.14	42	19	11	0.88	1.66667	23.0953	1.72	5.26	2.6	125	80	5.3	14153	1	3	1	72	22.2788	100	0.7	0.9	167	45	87	95	11	17	12		5.3	0.07		111	71
2	64			1	1	41.5	69	89	0.95	0.82	227	52	133	77	0.15	8	23	15	0.85		18.7684	1.1	1.03	3.2	120	70	5.4	14878	1	1	1	66	17.3028	95	0.7	0.79	223	65	127	66	10	20	16		5.2	0.27		128	80
2	63		2	1	1	52.5	80	181	0.55	0.94	186	34	111	131	5.25	12	25	21	5.9	17	22.8736	2.72	3.63	4.1	120	80	10.3	8345.5	1	1	1	79	23.7955	115	0.4	0.8	181	33	71	381	10	19	13		7.2	0.8		122	70
1	63			3	1	51.8	65	87	0.56	0.96	191	57	96	67	1.29	33	32	23	0.75		17.7356	1.05	1.25	5.2	120	80	5.7	21852	3	1	1	66	17.8484	82	0.7	0.9	153	43	83	70	29	29	17		5.4	2.42		110	70
2	69			1	1	65.9	89	82	0.68	0.88	205	41	121	219	0.32	10	21	12	2.45	50	25.678	1.65	11.35	4.7	120	80	4.9	14372	1	3	1	89	22.9027	93	0.8	0.81	207	56	121	74	12	22	14		5.4	0.59		111	64
2	59			1	1	56.2	79	85	0.85	0.8	153	43	87	54	1.11	9	23	14	0.8		24.6154	1.42	7.68	5.1	110	70	4.9	26201	1	1	1	76	24.8343	86	0.9	0.69	139	42	70	86	8	28	20		5.4	0.48		123	68
2	67			1	1	47.3	87	85	0.5	0.73	221	43	134	222	1.17	16	16	14	0.79		24.7296	1.28	4.2	4.2	100	60	5.1	22966	1	1	1	83	24.313	90	0.6	0.71	269	57	178	158	21	18	18		5.9	21.8		110	80
1	63			2	1	56.5	80	84	0.93	0.86	196	42	125	112	0.48	22	32	31	0.86	90	22.8635	1.24	2.62	4.9	120	80	5	14061	1	3	2	79.5	22.1861	95	0.84	0.78	156	49	77	68	17	32	32	4.1	5			129	80
1	57			1	1	69	89	108	1.13	1.08	192	40	109	226	1.36	92	25	31	22.73	89.2857	27.0884	1.73	11	5	130	80	5.7	6805.1	1	3	1	98	27.8779	116	0.8	1.01	227	38	111	507	80	23	30		6.3	0.89		120	80
1	60			2	2	57.6	69	98	1	1.07	177	58	91	91	0.17	22	34	24	0.89		20.0486	1.16	1.28	5.4	120	80	5.4	14084	1	3	1	72	19.9951	91	1.1	1.06	172	71	76	78	38	37	36		5.7	0.22		109	79
2	53			1	1	59.5	80	83	0.73	0.89	231	44	157	82	0.32	12	18	13	0.92		24.6385	1.45	11.85	3.3	110	70	5.2	15118	1	1	1	81	23.2905	88	0.7	0.89	282	46	179	103	12	22	17		5.7	0.64		122	64
1	55			3	1	54.5	83	93	1.34	1.07	184	56	101	74	5.87	38	18	24	0.89	147	17.7959	0.9	1.82	5.8	100	80	5.2	12582	3	3	1	69	16.9154	101	1.6	0.93	193	65	100	63	32	24	16		5.9	0.44		99	70
2	54			1	1	45.1	67	99	0.89	0.82	265	68	158	123	0.29	15	18	11	0.83		18.992	1.06	3.4	3.7	120	80	5.6	11600	1	1	1	64	17.5052	106	0.8	0.71	268	86	150	92	10	24	19		6	0.54		119	71
2	53			1	1	60.3	79	83	0.68	0.88	263	53	186	75	0.22	10	20	14	0.94		22.3107	1.15	5.83	2.4	110	70	5.1	12964	1	1	1	85	22.4042	84	0.5	0.78	205	44	124	71	9	21	12		5.9	0.21		100	67
2	50			1	1	48.8	79	81	0.79	0.92	231	43	170	58	0.81	9	23	19	0.88	53.5714	22.9565	1.16	4.98	5.8	110	80	4.5	6449	1	3	1	81	22.6439	81	0.7	0.96	262	51	171	72	12	24	18		4.8	1.29		114	73
2	51			1	1	48.6	70	86	0.72	0.88	171	65	81	53	0.27	9	21	14	0.87	35.6667	18.6796	0.94	3.96	4.7	110	80	4.7	14473	1	3	1	73	18.9784	84	0.7	0.76	154	60	61	80	9	21	16		5.1	0.37		112	64
2	67			1	1	49	77	83	0.63	0.83	193	46	123	79	1.42	9	21	16	0.79		21.7488	1.21	4.24	2.3	110	80	5	9021.7	1	1	1	75	19.876	81	0.4	0.75	189	48	106	117	9	25	21		5.1	0.08		104	61
1	67			3	1	57.5	83	91	0.53	0.99	247	44	172	169	0.6	18	23	20	18.6	12.5	23.3573	1.24	2.42	6.1	115	70	5.2	14430	3	3	1	79	22.1199	87	0.5	0.86	229	44	132	192	15	23	20		5.7	0.29		109	60
2	64			1	1	52.1	82	88	0.61	0.84	181	49	112	72	0.21	12	21	15	0.85		23.2485	1.22	4.37	3.3	110	80	5.2	19152	1	1	1	80	22.1612	97	0.6	0.87	169	63	78	48	12	26	16		5.8	0.47		109	62
2	67			1	1	57.6	82	93	1.09	0.93	213	43	154	72	2.02	19	21	24	1.11		23.9133	2.1	8.54	4.2	110	70	5.7	8200.1	1	1	1	86	24.3506	92	0.8	0.83	175	32	107	161	12	23	17		5.7	4.27		108	69
2	63			1	1	30.1	68	88	0.58	0.83	192	43	125	92	0.67	10	48	27	0.97		19.8956	1.32	2.83	4.9	110	70	5.7	23031	1	1	1	68	19.3668	89	0.7	0.73	172	45	95	106	20	53	26		5.7	0.34		135	88
2	62			1	1	49.7	69	84	0.76	0.77	210	35	149	136	0.34	10	29	21	0.83		19.9087	0.84	2.69	5.6	120	80	5.3	17353	1	1	1	69	18.5101	83	0.7	0.72	191	39	122	99	12	28	24		5.7	0.27		110	61
1	67			3	1	49	75	91	0.75	1.02	163	62	74	64	0.4	9	24	10	0.92	150	20.109	0.95	1.96	3.9	110	60	5.6	17095	2	3	1	81	21.0118	98	1.2	0.88	177	76	66	77	11	21	13		5.5	0.33		112	80
2	66		2	1	1	43.7	78	87	0.84	0.94	214	40	128	281	1.09	17	23	16	0.81		18.6925	1.37	7.6	6.3	100	60	6.1	11697	1	3	2	77.5	18.7598	134	0.75	0.81	198	57	106	127	21	20	16	4.5	6.4			120	80
1	67			3	1	52.6	80	93	0.33	1.14	188	44	118	107	0.59	22	20	16	1.27	124.286	21.4214	1.31	0.77	4.8	120	70	5.2	4007.1	3	3	1	79	19.996	85	1.4	0.9	164	69	63	83	50	27	19		5.2	0.22		150	80
2	62			1	1	46.5	72	87	0.88	0.94	185	49	110	101	0.33	8	25	16	1.55	76.9048	22.2698	0.93	2.69	4.4	110	84	5.5	10197	1	3	1	75	22.2279	82	1.1	0.81	183	63	92	81	9	25	19		5.4	0.27		119	70
2	64			1	1	50	75	102	0.7	0.9	187	32	113	204	0.7	9	23	15	0.74	21	22.5518	1.56	4.85	3.6	100	60	5.7	13062	1	3	1	90	23.0673	111	0.5	0.77	182	41	106	124	11	25	19		6	0.73		100	60
2	41			1	2	54.5	71	97	0.86	0.91	199	42	121	187	0.33	12	16	13	1.42	42.8333	22.6263	2.42	6.96	3.8	110	70	5.3	8986	1	3	2	72	21.5595	92	1	0.92	190	43	108	151	13	19	16		4.9	0.15		116	78
2	41			1	2	49.4	68	82	1.32	0.98	209	51	130	54	0.36	8	22	21	0.97		21.186	0.97	4.48	4.2	100	60	4.9	6776	1	1	2	66	19.944	84	1.3	1.02	209	54	119	66	7	24	19		4.8	0.05		110	89
1	58			3	1	65.1	87	90	0.67	0.91	181	38	108	102	0.76	20	30	30	2.92	169.167	26.1769	1.11	1.75	5.5	110	70	5.4	7670	3	3	1	90	25.8099	90	0.5	0.93	142	43	73	67	16	27	32		5.4	0.64		126	76
1	56			2	1	55.3	70	85	0.55	1.18	184	39	115	118	0.55	12	22	17	2.5		17.9954	1.18	0.58	6.3	100	80	5.2	11751	3	1	1	73	18.1699	81	0.6	1.09	157	48	78	72	11	28	19		4.9	1.63		88	51
2	44			1	1	51.4	66	83	1.06	0.79	136	44	60	33	0.2	13	21	12	1.27		20.9327	1.03	1.85	4.2	90	60	5.7	14761	1	1	2	76	20.944	83	0.9	0.68	139	46	71	45	11	16	10		5.1	0.1		98	68
2	46			1	2	69.3	88	101	0.58	0.96	190	38	115	87	0.73	13	22	17	0.91		25.8604	1.98	9.64	4.8	110	80	5.6	2697	1	1	2	91	25.9555	89	0.8	0.97	159	33	96	77	12	23	22		6	1.31		110	69
2	44			1	1	65.9	86	89	1.12	1.03	232	45	130	171	1.71	13	24	15	0.75		29.5642	1.19	8.24	4.6	130	80	5.6	5016	1	1	1	91	27.5213	86	0.8	0.87	221	46	126	234	12	21	16		5.3	2.49		119	77
2	52			1	1	53	84	97	1.21	0.88	226	35	142	151	0.75	18	22	16	1.39		20.4722	1.88	7.74	5.2	110	60	5.9	8501	1	1	1	95	25.9767	91	1	0.7	169	40	100	162	13	19	14		5.7	0.71		109	79
2	42			1	1	75.8	86	86	0.8	0.86	170	31	95	188	0.98	68	28	29	0.8	3.33333	30.0965	1.4	14.7	3.7	100	60	5.1	8697	1	3	1	97	29.2286	87	0.5	0.75	166	43	80	305	40	29	25		4.9	1.1		109	79
2	51			1	1	81	96	83	0.89	0.95	235	31	140	295	1.78	39	43	50	1.5		31.3266	2.72	15.39	6.1	120	70	5.8	4113	1	1	1	98	31.6323	95	0.7	1	250	42	171	137	45	50	62		5.8	1.97		127	96
2	44			1	1	64.9	74	87	0.66	0.93	186	40	90	302	0.27	22	20	21	2.33		27.33	1.43	10.67	4.9	110	60	5.6	5302	1	3	1	89	28.0516	94	0.6	0.8	197	43	104	313	29	22	32		5.9	0.28		111	78
1	66			2	2	72.7	97	116	0.6	0.98	214	39	125	177	1.7	60	44	27	0.89	16.6667	28.1516	4.61	3.57	5	110	70	7.7	2165	1	3	1	95	26.7466	110	0.6	0.97	132	40	67	96	23	23	39		5.9	1.25		104	62
1	57			3	1	67.7	84	100	0.85	1.12	167	38	111	57	0.89	25	25	14	1.29	92.5	22.4641	1.48	1.55	6.6	120	70	5.9	5743	3	3	1	92	23.8643	108	0.9	0.96	176	29	120	87	22	20	18		6	0.94		120	80
2	62			1	1	46.8	78	91	1.02	0.85	243	51	149	70	0.19	12	23	11	5.78		20.2829	0.95	1.65	4.5	80	60	5.8	8637	1	1	1	80	18.8902	87	0.7	0.86	216	59	125	62	11	21	15		5.7	1.66		110	70
1	57	4		3	1	47.2	62	92	0.49	1.15	176	46	90	69	0.53	13	28	17	1.42		17.2324	0.94	0.57	5.5	100	60	5.6	10018	3	1	1	66	17.2013	83	0.8	0.88	144	43	78	63	12	31	21		5.4	0.59		89	69
2	43			1	2	59.3	80	95	0.72	0.88	202	51	100	170	0.2	32	18	10	0.72		22.7076	1.75	8.3	6	100	60	5.2	8548	1	1	2	80	21.7275	97	0.7	0.9	175	54	84	164	28	24	23		5.1	0.25		108	60
1	61			3	2	70.4	89	84	0.6	1.08	169	34	101	136	0.72	34	22	17	2.74	71.4286	24.6782	1.14	2.67	7.9	135	80	5.5	3446	3	3	1	90	24.463	95	1	0.97	182	38	112	130	52	25	23		5.6	0.81		140	92
1	65			2	1	62.3	75	85	0.91	0.97	189	35	127	48	0.49	17	29	18	0.73		22.8004	1.01	1.5	5.5	120	80	5	8050	1	1	2	88	23.6754	87	0.99	0.9	168	40	108	51	16	25	17	5.6	5.2			140	100
2	55			1	2	55.9	71	95	0.62	0.98	203	72	97	94	0.24	12	21	12	0.95	39.1667	22.1951	1.66	3.4	4.1	120	70	4.6	19029	1	3	2	71	22.1303	100	0.88	0.86	191	66	98	76	11	19	13	4.5	5.8			102	70
1	42			2	1	62.4	79	89	1.05	1.17	159	51	82	63	0.41	24	19	12	0.95	122.381	22.3744	0.95	1.48	6.1	110	70	5.3	4240	1	1	1	81	21.6352	93	0.7	0.94	148	66	58	53	23	26	16		5.5	0.28		120	69
2	68			1	2	44.1	70	93	0.63	0.95	202	44	128	144	0.35	17	29	21	1.42		19.2901	1.04	2.08	4.5	120	80	5.5	15159	1	3	1	72	20.2891	103	0.7	0.76	147	48	70	152	11	36	23		5.4	0.9		122	76
1	71			1	2	67.9	88	93	0.6	1.08	221	45	155	101	0.41	36	28	23	4.04	57.7143	24.2883	0.92	3.04	4.5	110	80	5.8	8546	1	3	1	85	24.1463	93	0.8	0.81	211	42	128	145	31	24	23		5.8	1.09		110	62
2	51			1	2	58.7	77	79	1.41	1.07	220	46	150	80	0.21	12	22	10	0.89		22.9011	1.32	3.43	4.2	120	70	5.7	11195	1	1	2	79	23.3004	90	1.6	0.86	209	37	134	144	11	24	13		5.9	0.1		120	82
2	59			1	1	56.2	83	122	0.61	0.92	278	43	194	125	0.93	15	22	20	0.78		24.9113	2.78	11.1	5.5	130	80	6.8	8631	1	1	1	78	24.6764	134	1	0.78	227	38	143	153	11	22	21		7.1	1.42		112	80
2	53		4	1	2	62.3	78	83	0.72	0.95	156	41	96	57	1.79	13	22	17	1.35		24.5503	1.19	10.35	5.5	100	70	5.9	8287	1	1	1	84	25.5923	89	0.7	0.82	188	52	109	53	20	44	61		6.4	1.54		125	66
2	47			1	1	47.8	72	79	0.78	0.81	197	42	125	160	0.58	39	23	23	0.84		21.5595	1.11	7.94	3.5	110	70	5.5	7119	1	1	1	76	21.4202	84	0.7	0.74	213	51	127	123	44	27	30		5.5	0.68		120	70
2	63			2	2	46.5	72	99	0.73	0.97	218	54	140	114	0.5	17	20	18	0.77		19.658	1.94	4.11	4.7	110	80	5.8	6861	1	1	1	73	19.5907	102	0.9	0.82	225	45	138	144	14	21	20		6.1	0.39		110	70
2	55			1	1	57.7	77	83	0.45	0.95	197	40	139	78	1.14	18	24	18	0.8		22.8235	1.45	12.61	5.2	110	60	5.1	7446	1	1	1	82	23.2586	82	0.7	0.9	238	42	146	217	60	45	59		5.4	0.42		102	60
1	64			3	1	53.2	77	100	0.62	1.18	167	43	95	142	0.29	22	22	15	0.86	142.857	19.8767	1.14	0.64	7.1	120	80	5.3	8705	2	3	1	79	19.8131	100	0.8	0.99	155	42	83	115	14	27	18		5.5	0.7		100	70
2	44		2	1	1	58.4	78	156	0.85	0.89	178	45	88	86	0.22	12	13	19	0.87		23.9053	2.61	5.01	4	130	70	7.2	5046	1	1	2	84	24.3474	139	1.1	0.77	195	44	113	148	15	14	21		7.4	0.36		120	80
2	44			1	2	64.3	81	81	0.55	0.81	211	38	132	114	3.02	13	32	21	0.76		24.9921	0.39	11.09	3.5	100	70	4.8	6876	1	1	1	84.2	24.4395	82	0.63	0.83	217	35	153	117	16	20	18	3.8	5.3			100	60
1	44			1	1	72.7	82	80	0.9	1.06	175	45	103	62	0.39	14	21	11	0.73		24.5741	1.49	2.29	5.7	120	80	5.2	2740	1	1	2	83	22.2597	90	0.6	0.96	188	54	92	81	10	20	9		5.6	0.86		107	69
2	49			1	1	63.2	81	85	1.12	0.82	168	29	123	132	0.3	12	19	14	0.73		26.2382	1.38	11.22	4.8	110	70	5.1	13922	1	1	1	94	27.279	88	1.1	0.76	158	31	80	229	14	22	19		5.1	0.26		109	79
1	59			3	1	58.2	82	90	0.71	1.06	175	47	105	54	0.12	9	196	25	0.77	11.6667	19.9036	0.85	0.5	4.6	130	80	5.8	15067	3	3	1	82	18.8901	91	0.8	0.87	153	47	76	54	9	213	21		5.4	0.1		105	78
2	48			1	1	60.6	81	85	1.08	0.81	177	66	91	85	0.54	12	26	18	0.75		27.5916	1.53	6.63	3.7	110	80	5.3	14856	1	1	1	89	29.5547	91	0.86	0.82	225	85	116	42	11	24	22	3.6	5.5			100	70
2	49			1	1	59.5	84	80	0.97	0.91	156	29	99	222	0.78	10	17	10	0.75		24.3868	1.03	12.76	4.3	120	80	5	8786	1	1	1	87	25.6328	80	0.9	0.69	142	32	78	122	9	16	9		4.7	1.52		111	89
2	66			1	1	64.9	88	88	0.92	0.86	224	39	149	257	0.9	14	20	17	0.72		26.8401	1.92	15.07	3.5	110	70	6.5	14972	1	1	1	88	26.8871	91	0.8	0.84	235	53	134	200	12	21	14		6.4	0.68		90	65
2	44			1	1	52.6	69	91	1.05	0.81	152	41	93	96	0.18	9	12	10	0.73	5	22.8869	1.72	8.11	2.8	110	80	5.2	8927	1	3	1	71	21.6353	81	0.7	0.65	186	44	107	103	8	17	14		5	0.31		122	70
2	49			1	1	57.5	87	82	0.75	0.72	164	29	98	176	1.4	7	17	7	1.55		23.5973	1.91	6.28	4.3	100	70	5.1	7297	1	1	1	84	23.131	78	0.9	0.69	180	27	99	278	9	18	17		4.9	1.48		110	62
1	47			1	1	64.4	81	79	0.8	1.07	138	33	77	71	0.29	13	31	19	7.03		24.0908	1.13	0.92	6.2	110	70	5.4	6710	1	1	2	83	23.8289	90	0.8	1.02	161	46	91	50	10	28	19		5.1	0.29		109	78
2	50			1	1	59.4	86	97	1.01	0.87	162	34	97	219	1.69	124	32	38	1.95	29.1667	25.7437	1.81	6.83	5.3	120	80	5.5	6726	1	3	1	88.3	25.8304	95	0.99	0.97	187	41	116	97	53	22	20	5.2	5.3			121	78
2	67		2	1	1	63.3	88	90	0.75	1.43	161	41	80	170	1.74	31	27	25	5.12		26.9352	4.47	25.39	7.7	110	80	7	4799	1	3	2	89	25.9641	101	0.5	1.41	211	57	114	107	20	18	14		6.3	1.66		109	72
2	66			1	1	60.9	87	100	0.51	0.93	214	41	110	326	3.47	15	15	16	0.89		25.2183	2.16	9.76	5.7	110	80	6.2	8805	1	1	1	88	24.4656	93	0.7	0.81	218	62	108	177	19	22	18		5.5	2.68		111	90
2	67			1	1	50	70	83	0.52	0.9	138	30	75	103	10.91	7	25	15	2.71		19.8776	0.93	5.63	3.9	100	70	5.4	17257	1	1	1	69	20.2211	74	0.9	0.8	162	43	90	51	9	24	13		5.2	1.93		111	78
2	65			1	1	41.8	67	87	0.56	0.77	202	46	129	77	0.36	10	24	15	0.79		18.3568	1.14	5.8	5	110	70	5.4	16790	1	1	1	73	17.9616	92	0.5	0.69	178	45	101	85	11	24	15		5.6	0.18		100	60
2	69		2	1	1	59.3	81	402	0.51	0.99	279	25	152	496	1.3	26	13	12	13.32		24.6508	8.87	6.27	3.5	120	80	10.4	8928	1	1	1	78.7	22.2872	110	0.37	0.79	210	22	123	361	22	11	7	4.1	6.4			138	80
1	42			1	1	84.7	95	120	1.2	1.08	234	37	143	256	1.75	27	41	69	2.1		27.784	2.33	4.82	5.4	120	80	6.5	3833	1	1	1	95	26.1139	126	1.06	1.1	224	47	143	131	20	33	50	5	6.9			125	92
2	66			1	1	48.4	86	91	0.91	0.8	184	44	115	135	0.67	15	24	17	1.66		22.9885	1.9	9.95	3.7	110	80	5.6	17086	1	1	1	89	22.5774	98	0.7	0.74	189	44	103	137	13	25	23		5.6	0.49		99	61
1	67			1	1	54.1	88	85	0.86	1.03	186	48	119	76	0.29	9	23	12	1.95		19.9197	1.42	1.46	6.1	110	70	5	8761	1	1	1	74	19.1968	91	0.83	1	186	45	117	93	14	20	13	6.2	5			90	64
2	48			1	1	47.2	67	80	0.74	0.81	189	65	101	69	0.23	13	16	14	0.75	6.66667	19.9799	0.85	2.89	3.8	120	80	5.1	15106	1	3	1	68	20.2763	97	0.7	0.77	218	79	97	48	17	26	17		5.3	0.33		98	58
2	50	3	2	1	1	59.5	88	93	1.01	0.83	213	44	150	139	1.9	41	38	50	0.98		24.6069	2.95	9.23	5.6	110	70	6	9025	1	1	1	84	23.7581	119	0.96	0.82	157	39	92	123	56	47	60	5.2	6.3			118	80
1	47			2	2	74.6	86	84	1.25	0.96	147	33	93	96	0.21	13	18	15	1.27		23.7581	1.41	1.69	5.3	110	80	5.2	5389	1	3	1	88	22.7904	87	0.7	1.01	126	24	74	78	14	19	12	5.7	5.4			132	86
2	55			1	1	54.6	72	95	0.76	0.9	218	43	133	176	0.73	14	23	17	1.58	36.6667	22.4647	2.14	4.34	4.3	110	70	5.6	11590	1	2	1	76	22.4153	95	0.7	0.67	255	35	172	127	13	20	19		5.7	3.26		106	78
1	47			2	2	76.8	91	94	1.08	1.1	197	45	130	133	6.15	162	33	41	0.38	129.143	29.2277	1	5.33	6.3	120	80	5.7	3810	1	3	2	88.4	28.0339	102	0.92	0.95	175	44	105	95	58	24	26	5.5	5.7			112	80
2	46			1	2	44.2	63	89	0.7	0.98	201	53	113	123	0.54	12	23	17	1.35		20.316	1.49	4.38	5	120	70	5.6	8554	1	1	1	69	20.8638	92	0.6	0.91	217	63	119	114	10	20	18		5.8	0.42		119	68
2	52			1	1	47.5	77	78	0.76	0.79	174	57	80	134	0.47	25	25	29	0.66		22.1924	0.83	4.58	2.9	120	80	5	13019	1	3	1	95	22.9091	81	0.8	0.76	207	78	101	66	33	24	28		4.9	0.33		122	89
2	65			1	1	48.7	78	81	1.17	0.9	215	56	120	119	1.12	14	29	18	0.42		21.218	0.88	3.85	4.8	100	70	6.5	14457	1	3	1	74	19.8762	93	0.9	0.86	195	66	95	86	14	26	19		5.9	0.46		101	70
1	69			1	2	66.2	78	84	1.74	1.02	171	44	98	89	0.39	13	25	16	1.05	67.5	23.6519	0.86	2.09	4.8	120	80	5.2	12584	1	3	2	84	23.1696	86	1.5	1.07	183	45	102	144	18	22	10		5.6	0.98		115	82
2	53			1	1	52.2	72	86	0.74	0.88	180	47	113	60	0.3	11	19	14	0.41		20.7784	1.4	8.55	4.5	100	70	5.3	10553	1	1	1	71	19.5948	81	0.9	0.8	179	48	97	88	10	18	13		5.3	0.33		110	70
1	48			3	1	59.1	78	87	0.85	1.06	160	37	101	111	0.09	19	21	19	0.27		21.577	1.08	1.86	5.1	120	80	5.4	6106	3	1	2	78	19.9582	88	0.9	1.03	175	46	103	59	17	23	20		5.5	0.18		128.5	71
1	69			3	1	90.2	102	113	0.9	1.12	173	31	90	320	1.51	41	25	27	0.36	8.33333	32.537	2.25	4.89	6.6	130	80	7.3	4191	3	3	2	98	31.0277	180	0.7	1.13	199	32	99	396	31	24	31		10.5	2.58		108	70
2	69			1	1	45	74	100	0.55	0.79	194	52	121	88	0.56	16	21	20	0.49		20.134	1.5	6.26	6	110	80	6.1	17812	1	1	1	73	20.3607	91	0.5	0.83	169	53	75	138	25	26	20		6.5	0.29		132	90
2	62			1	1	48	69	88	1.08	0.79	175	40	110	107	2.98	23	29	20	0.97		21.5917	0.85	3.48	3.5	130	80	5.9	12645	1	1	1	78	22.1323	95	0.8	0.77	182	44	106	158	88	163	208		5.8	2		129	88
2	54			1	1	44.9	69	79	0.64	0.8	178	41	110	134	0.31	11	14	10	1.49		21.9878	0.9	3.43	3.6	130	70	5.6	10564	1	1	1	76	21.028	87	0.6	0.7	160	42	85	147	18	34	26		5.3	0.78		112	76
2	64			1	2	56.4	75	95	0.88	0.86	198	42	128	134	0.51	10	21	11	0.69		23.5059	1.38	4.85	4.9	120	80	6	8434	1	1	1	90.3	25.2449	101	0.9	0.86	166	42	89	145	16	18	17	4.6	6.4			110	70
2	52			1	1	56.6	80	78	1.05	0.9	181	46	115	90	0.29	16	20	13	0.38		25.0219	1.21	7.98	4.6	90	60	5.5	5170	1	1	1	83	25.7612	78	0.8	0.78	177	43	98	123	17	18	18		5.3	0.79		98	68
1	45			1	2	78.2	90	95	0.74	1.19	246	39	185	146	0.36	38	22	33	0.11	49	26.8059	1.82	2.56	6.7	130	80	5.3	8104	1	3	2	91	27.1781	100	0.59	1.08	224	36	143	271	35	29	34	7.9	5.4			140	90
2	42			1	1	57.7	72	84	1.27	0.94	149	45	91	48	0.08	8	17	12	0.98		23.3491	1	1.26	3.8	110	80	5.3	16590	1	1	2	78	24.2278	89	1.3	0.83	145	41	71	71	7	24	21		5.3	0.08		119	77
1	48			1	1	53.1	69	84	0.94	1.12	151	44	95	53	0.53	14	17	16	0.34		20.4092	1.06	1.41	5.1	110	80	5.4	10064	1	1	1	72	20.0957	85	0.9	0.99	144	44	68	42	10	24	23		5.4	0.59		111	71
2	45			1	1	50.8	64	84	1.34	0.8	130	39	71	105	0.28	16	19	9	0.27	6.66667	21.4201	1.43	3.06	3.2	120	80	4.7	13804	1	3	1	73	22.454	96	0.9	0.7	130	43	57	58	12	23	15		4.9	0.35		113	71
2	44			1	1	49.1	71	77	0.8	0.72	158	46	94	66	0.34	12	19	13	0.58		20.4899	1.06	4.81	4	130	80	5	10749	1	1	1	76	20.6765	83	0.8	0.66	181	49	96	91	11	19	16		4.7	0.35		107	71
2	57			1	1	51.6	81	88	0.7	0.79	169	39	102	158	0.97	12	21	24	0.25	3.33333	23.2734	1.15	3.15	4.3	100	60	5.4	5806	1	2	1	90	23.6845	91	0.5	0.76	185	45	113	129	11	20	18		5.3	0.71		110	71
1	69			3	2	68.3	91	81	1.16	0.94	206	42	138	257	1.09	39	24	19	1.58	53.5714	25.5497	0.92	2.19	5.7	130	80	5.9	3620	3	3	2	89	24.1889	91	1.2	0.92	214	38	129	234	37	28	22		6.1	0.68		110	72
1	60			1	2	72.6	90	78	0.68	1.32	160	32	106	103	0.51	20	23	22	2.36		25.54	1.04	6.56	6.4	110	80	5.6	13750	1	1	2	93	25.4185	90	0.6	1.34	173	42	99	121	28	24	25		5.3	0.63		127	81
2	44			1	1	49.8	73	78	0.85	0.82	176	46	107	103	0.98	17	15	13	0.86		20.2811	1.4	5.66	4.4	120	80	5	1678	1	1	2	76	20.7291	84	0.8	0.74	170	49	89	89	16	18	14		5.4	5.74		92	61
1	61			1	1	65.6	83	88	0.93	1.07	169	45	105	77	0.27	16	24	18	0.15	21.4286	21.9948	1.13	1.12	3.9	110	70	5.9	15234	1	3	2	82	20.3048	102	0.8	0.94	160	65	67	73	11	30	12		5.7	0.17		119	67
2	45			1	2	70.2	82	91	1	0.86	138	40	82	77	0.83	27	61	70	0.88		25.7851	3.6	12	4.1	90	60	4.9	7861	1	1	1	86	27.4815	89	0.95	0.82	110	36	60	64	34	46	36	4.4	4.9			130	80
2	67			1	1	42.1	74	84	1.16	0.87	225	42	148	251	0.75	18	25	19	6.93		20.7325	1.43	6.73	4.2	80	40	6.4	11727	1	1	1	70	19.9658	82	1.3	0.73	220	33	136	240	7	23	13		5.9	0.24		99	66
1	59			1	1	71.8	83	102	0.82	1.05	233	53	154	104	1.65	38	28	21	0.23	125	23.5524	0.84	2.64	5.7	110	70	6.6	7764	1	3	1	90	23.4092	118	0.8	0.81	190	41	112	142	27	27	21		6	0.86		121	71
2	69			3	2	57.3	87	111	0.46	0.94	271	36	197	208	8.57	25	24	28	0.69		26.373	2.15	18.04	4.7	120	80	6.7	6537	3	1	1	89	24.6656	103	0.29	0.75	227	39	162	193	17	27	24	4	5.7			132	72
2	48			1	1	53	78	87	0.74	0.91	189	40	119	137	0.26	9	24	20	0.88		23.1219	1.18	9.89	5.7	130	80	5.9	17262	1	1	1	88.2	23.6832	91	0.58	1.03	237	37	152	197	13	19	21	5	5.9			148	100
1	43			3	1	68.7	84	89	1.82	1.2	141	26	88	126	0.37	13	20	22	0.3		21.9286	1.25	1.6	5.9	120	70	5.9	2734	3	1	1	82	21.7051	85	1.3	1.1	155	33	90	96	11	19	20		5.9	0.59		88	52
2	41			1	1	57.3	70	81	1.27	0.96	159	48	87	92	0.19	9	20	13	0.25		23.2464	1.1	10.33	2.6	120	70	5.1	10878	1	1	1	73	22.8119	82	1.5	0.88	181	53	97	62	8	22	15		5.2	0.07		100	70
1	58			1	1	58.8	89	94	0.99	1.17	178	49	105	63	0.29	13	26	21	0.64	104.167	19.7606	1.19	1.17	4.6	120	80	5.7	14237	1	2	1	85	20.5457	96	1.5	1.26	194	56	110	70	36	35	41		5.4	0.47		100	80
2	48			1	1	49.3	73	89	0.8	0.9	183	36	126	86	0.28	16	18	19	0.3		20.0008	1.23	6.08	5.1	110	80	5.9	6028	1	1	2	70	18.9599	96	0.7	0.88	189	44	109	97	11	19	14		5.6	0.28		110	81
2	47			1	2	66.5	85	84	0.79	0.89	177	51	104	68	0.39	11	24	14	0.52	55.5714	27.1862	1.24	10.14	3.5	110	80	5.4	8253	1	3	1	83	27.3556	88	0.79	0.88	207	49	130	82	11	20	13	3.5	5.7			100	62
2	41			1	1	66.5	82	90	0.74	0.69	165	50	90	82	0.21	9	8	12	0.34	9	28.0038	1.68	10.15	4.8	110	70	5.8	3344	1	1	1	95	27.1615	90	0.6	0.72	167	52	81	58	9	8	7		5.1	0.15		110	80
2	45			1	2	59.4	73	82	0.57	0.88	149	46	79	77	0.76	9	13	16	0.25		24.0065	1.01	8.86	4.8	120	70	5.4	8698	1	1	2	78	24.5007	88	0.45	0.8	163	54	88	60	14	18	10	4.6	5.4			110	70
2	64			1	1	59.5	84	86	0.62	0.87	195	47	123	81	0.93	87	37	39	0.34		25.1866	1.23	9.07	4.3	110	80	5.5	16611	1	1	1	89	25.3939	91	0.8	0.64	173	49	94	68	24	27	18		5.5	1.06		96	61
2	43			1	2	56.7	67	83	0.43	0.97	145	37	88	50	3.76	8	24	13	0.42	38.3333	24.1267	1.37	7.89	4.1	110	70	5.4	11003	1	3	2	69	25.9909	84	1.1	0.89	156	54	76	73	7	20	19		5.1	0.18		108	64
1	48			3	1	55.9	74	95	0.72	1.11	154	37	92	99	0.1	11	27	28	3.17	62.5	21.8359	1.11	1.01	4	110	60	5.8	7143	2	3	1	84	22.823	108	0.8	1.05	214	49	116	189	14	28	22		5.7	0.49		110	71
2	50			1	1	53.9	75	86	0.72	0.9	186	46	113	68	0.36	10	21	18	0.99		22.6978	1.21	5.43	3.9	110	70	5.9	8333	1	1	1	81	23.1001	87	0.7	0.82	207	52	123	56	10	21	16		5.7	0.97		94	54
1	49			2	1	63.9	81	99	1.85	1.03	183	47	116	69	0.35	17	23	22	0.32	86.6667	22.2414	1.39	1.59	3.6	110	80	5.8	4051	1	1	1	84	22.9182	94	1.39	0.98	221	52	139	96	19	26	41	3.5	5.5			122	80
2	66			1	1	52.3	77	85	0.96	0.87	173	58	93	60	0.44	34	34	24	1.05		21.137	0.93	2.53	2.9	100	70	5.1	14977	1	1	1	76	20.9549	84	1.1	0.79	201	78	93	40	26	37	23		5.3	0.27		119	81
2	53			1	1	64.9	82	86	0.56	0.86	209	40	143	110	0.63	21	24	19	0.25		25.7038	1.4	11.24	5.2	100	60	5.1	7609	1	1	1	88	25.388	87	0.9	0.81	217	50	136	64	15	25	23		5.4	0.51		88	49
2	57			1	1	73.4	99	98	1.38	0.9	230	44	161	104	1.92	25	25	20	0.41		29.9304	2.69	14.34	5.1	130	70	5.8	6634	1	3	1	95	29.0954	93	1.4	0.89	220	48	132	76	15	22	17		5.8	2.08		132	71
2	40			1	1	60.5	70	83	0.94	0.89	202	55	127	99	0.44	8	22	9	4.29		22.6042	0.87	2.95	2.5	130	80	5.5	8307	1	3	2	74.2	21.593	96	0.56	0.84	197	55	106	124	10	21	6	2	5.6			110	70
2	45			1	1	61.5	85	89	0.44	0.86	163	46	97	61	0.26	12	28	20	3.61		26.4792	1.45	14.69	4.4	100	60	5.2	13771	1	1	1	81	24.5165	89	1.1	0.79	158	50	77	71	11	23	15		5	0.18		108	60
2	53			1	1	55.8	75	94	0.64	0.77	189	31	128	153	0.48	29	23	20	6.08		23.8682	2.85	8.59	4	120	80	5.3	3573	1	1	1	87	24.9904	96	0.5	0.77	202	33	138	184	28	26	32		5.7	0.49		131	78
2	49			1	2	66.5	80	87	0.83	0.93	182	50	105	103	0.29	9	15	11	0.27	6.66667	26.9102	1.62	9.09	4	110	70	4.9	16979	1	3	1	93	27.221	81	0.74	0.87	180	50	100	85	12	12	11	4.6	5			108	78
2	51			1	2	58.9	80	84	1.03	0.9	197	58	116	87	0.41	11	25	14	0.01		24.5795	1.63	15.67	6.9	120	80	5	10850	1	1	2	76	22.6723	90	1.3	0.77	130	44	58	73	10	28	17		5.3	0.05		122	82
1	64			2	1	65.2	81	94	0.87	1.07	216	53	143	85	0.32	18	25	20	0.67	71.4286	23.4345	1.14	0.73	5.5	120	80	5.2	8021	1	3	2	82	23.1355	97	0.9	0.88	244	61	152	77	18	28	23		5.5	0.09		110	69
1	57		2	2	1	69.5	91	131	1.02	1.02	171	49	99	100	0.63	70	29	35	1.07	142.857	23.5472	1.43	1.51	5.5	120	70	7.2	3504	1	3	2	92	21.9292	170	0.8	0.96	175	42	101	83	41	25	28		7.8	0.57		108	75
2	54			1	1	63.9	82	91	0.89	0.91	187	49	115	79	0.51	15	26	22	0.63		25.4677	1.7	8.35	4.2	110	70	5.7	12174	1	1	1	80	25.3886	94	1.1	0.85	191	48	112	77	15	26	19		6	0.32		110	78
2	57			1	1	54.6	77	88	0.91	0.95	140	50	72	46	0.38	18	32	25	0.39	20.8333	23.7571	1.6	6	4.5	110	80	5.5	10465	1	3	1	79	22.4675	100	1.5	0.82	170	57	89	62	27	34	26		5.8	0.65		92.5	60
1	55			2	1	77.1	86	126	1.14	1.13	156	40	86	188	0.79	34	30	27	17.63	52.8571	25.6423	2.48	3.05	5.6	130	80	7	4041	1	3	1	84	24.135	95	1.4	1.06	156	38	89	124	18	29	19		6.3	0.38		102	51
1	56			3	1	67.6	82	108	0.33	1.14	216	32	14	1552	1.22	52	25	17	8.15	198.857	23.7248	1.47	2.63	5.8	130	80	5.9	5270	3	3	1	82	23.6469	128	0.5	1.01	134	50	53	111	27	24	20	5.2	6			122	82
2	66			1	1	65.3	94	141	0.68	0.77	220	36	143	258	1.41	22	26	17	4.77		29.6914	12.76	5.74	4.5	130	80	5.7	4653	1	1	2	96	29.6749	113	0.86	0.61	237	35	157	217	23	27	16	4.8	6.3			148	82
2	68			1	1	57.2	86	96	0.55	0.85	208	55	133	76	2	24	29	30	0.69		24.7576	2.05	8.82	3.9	120	80	5.4	11076	1	1	1	80	25.5031	87	0.58	0.74	191	41	119	117	24	25	22	3.6	6.3			152	80
1	42			2	1	66.5	84	83	0.87	1.16	168	34	110	142	0.43	122	31	33	0.24	45.8333	24.0457	1.49	4.89	6.3	120	80	5	6397	1	3	1	85	24.8499	83	0.7	1.08	179	38	112	94	168	48	79		5.5	0.44		123	81
2	64			1	1	65.1	94	81	0.5	0.91	141	34	83	122	0.92	17	23	17	1.18		27.027	1.34	6.69	3.5	120	80	5.2	10312	1	3	1	91	28.1635	79	0.8	0.9	142	40	79	98	10	18	17		5.4	1.64		130	80
2	64			1	2	54.3	78	97	0.65	0.84	211	71	113	107	0.45	37	24	23	0.72	53.5714	22.8662	1.36	9.06	3.1	110	70	5.2	15138	1	3	1	87	23.2757	87	0.5	0.8	238	61	149	69	30	31	33		5.5	1.67		120	70
2	46			1	1	54.6	71	83	0.79	0.88	170	47	103	71	0.31	19	22	12	0.36	89.2857	23.9146	1.29	10.09	4.2	110	80	5	9648	1	3	2	81.5	24.8125	90	0.51	0.85	188	35	122	159	21	22	11	5.4	5.2			120	70
2	59			1	1	58.4	83	96	0.63	0.93	187	46	105	171	1.32	34	21	19	5.95		24.4024	2.84	7.82	5.7	110	80	5.5	10042	1	1	1	86	25.1823	103	0.7	0.86	205	52	122	77	24	21	21		5.9	1.28		132	71
2	51			1	1	52.6	70	86	0.9	0.82	147	40	83	89	0.66	8	27	20	1.74		22.3821	1	2.97	3.3	100	70	5.4	16449	1	1	1	75	21.9427	90	0.8	0.76	128	36	65	91	11	28	20		5.5	1.63		104	78
1	68			3	1	50.3	70	93	1.02	1.14	177	48	99	107	0.75	15	29	22	1.47	50	19.8215	0.23	0.7	6.3	110	70	5.6	8331	3	3	1	74	19.4834	89	0.8	1.03	173	47	99	64	16	23	16		6	6.32		108	75
2	59			1	1	50.5	72	90	0.61	0.83	168	29	46	622	1	19	24	17	0.28		22.6251	1.05	6.52	4.4	110	80	5.4	7449	1	1	1	79	22.2965	98	0.5	0.86	181	34	100	252	13	26	22		5.5	0.89		104	76
2	68			1	1	44.1	64	88	0.65	0.79	156	45	79	96	0.27	12	23	20	0.89		19.6262	1.13	3.42	2.9	110	80	5	26566	1	1	1	73	19.4407	88	0.7	0.7	169	44	90	77	8	23	15		5.1	0.23		109	68
2	46			1	2	64.7	78	87	0.51	0.86	180	60	86	89	0.98	29	28	37	0.28	84.1667	27.7113	0.89	10.61	4.2	110	80	5.6	10642	3	3	2	87	28.2993	99	0.7	0.82	189	62	90	143	20	25	23		5.9	1.09		122	75
2	63			1	1	75.5	103	92	0.54	0.87	195	34	119	182	40.48	36	66	61	0.44	29.1667	32.8077	1.72	12.96	6.2	130	70	6.2	6619	1	3	1	104	32.8513	105	0.7	0.76	194	40	107	179	50	97	86		6.6	5.46		122	71
1	61			3	1	65.5	82	85	0.98	0.93	141	40	81	61	0.31	8	35	23	0.65	21.4286	23.152	0.56	1.21	3.7	120	80	5.5	8434	3	3	1	81.7	22.3569	87	0.79	0.86	134	42	67	88	34	31	28	3.3	5.5			116	70
1	45			3	1	61.6	79	93	0.56	1.23	190	34	123	234	0.26	24	24	20	0.23		20.7256	1.38	1.86	4.6	110	70	5.1	7061	1	1	1	80	21.04	84	0.8	1.18	193	31	101	331	20	24	23		5.4	0.41		110	70
2	47			1	1	54	76	86	0.95	0.91	123	28	76	80	0.21	7	18	12	0.33		22.3036	0.92	8.67	4.4	100	70	5.2	7740	1	1	1	73	22.8459	86	1.1	0.88	169	30	108	84	11	20	15		5.7	0.65		90	61
2	43			1	2	52.3	65	88	0.56	0.89	204	60	122	64	0.9	12	16	9	0.61	22.5	20.1267	0.55	9.47	2.2	100	60	5.7	5218	1	1	1	75	20.5504	82	0.8	0.85	220	60	122	89	11	15	12		6	1.03		125	72
1	43			2	1	78.5	89	113	1.1	1.11	187	38	70	533	1.84	55	40	34	1.81	178.571	26.6585	1.81	2.6	7.3	110	70	5.6	4484	1	3	1	89.3	25.6437	125	0.69	1.21	209	33	85	602	31	26	24	8	6.1			112	80
2	69			1	1	48.2	75	92	0.76	0.72	179	37	119	71	0.38	9	25	13	0.24		20.3767	0.78	2.45	3	100	70	5.5	9241	1	1	1	77.7	20.4195	90	0.54	0.72	216	40	158	101	23	40	40	3.8	6			121	71
2	67			1	2	56.6	79	99	0.72	0.77	211	53	139	58	1.14	13	28	15	0.95		24.2421	1.73	7.77	3.7	110	80	5.7	12693	1	1	2	81	23.9192	111	1.2	0.78	214	51	134	57	10	30	18		6.2	8.75		110	71
2	63			1	1	50.7	77	91	0.8	0.79	203	45	134	90	0.56	11	24	11	1.35		21.4336	1.5	6.33	2.1	130	80	5.4	19211	1	1	1	84.5	23.4339	91	0.54	0.79	186	34	114	204	15	41	27	2.8	5.8			148	80
2	45			1	1	47.6	63	81	0.9	0.84	192	74	89	81	3.58	10	28	19	0.67	38.8571	21.7606	1.06	6.73	3.6	90	60	4.9	11912	1	3	1	69	22.9197	85	0.8	0.69	207	76	92	141	11	32	28		4.8	1.53		102	70
2	42			1	1	54.4	77	82	0.74	0.86	153	38	92	98	0.24	8	14	12	0.67		22.9083	1.09	7.67	5	110	70	4.6	7071	1	1	1	76	22.1388	101	0.7	0.83	150	47	72	92	9	16	11		5.4	0.55		110	70
2	44			1	1	59.9	77	86	0.56	0.96	141	36	87	88	0.2	11	24	26	0.77		21.7376	1.52	10.58	3.4	130	80	5.4	11508	1	1	1	83	22.4344	95	1	0.85	172	41	104	83	10	27	24		5.6	0.42		119	80
2	44			1	1	53.6	72	85	0.87	0.83	203	45	137	94	0.33	11	25	25	0.24	12.3333	21.9125	1.09	7.45	3.8	130	80	5.2	5885	1	3	2	78	23.0353	95	1.2	0.73	200	45	127	53	11	22	19		5.2	0.06		105	61
2	40			1	1	80.2	93	78	0.65	0.84	193	38	133	153	1.18	31	34	30	0.34	1.66667	30.5971	1.49	12.94	4.7	120	70	5.8	7244	1	3	1	101	31.7361	98	0.9	0.79	225	40	144	194	55	99	121		6.3	1.77		110	60
1	47			2	1	65.2	86	84	1.09	0.87	149	37	88	90	0.89	13	23	18	17.17	170	22.7207	0.98	2.57	5.4	120	70	5.1	9966	2	3	2	87	22.1631	87	0.75	0.84	150	45	83	51	11	24	18	5.1	5.4			110	70
2	44			1	1	62.9	85	86	0.48	1.04	174	36	117	127	4	15	26	17	8.35		27.9556	1.71	18.79	3.4	110	80	5.2	4916	1	1	1	93	29.7585	90	0.8	1	174	33	105	174	15	30	27		5.4	1.98		120	70
1	65			3	1	73.2	89	91	0.98	1.28	245	44	170	141	1.54	18	28	18	0.36	42.8571	25.5688	0.88	2.53	4.6	130	80	5.6	5919	3	3	1	92	24.4599	92	0.8	1.12	249	45	167	150	14	17	11		5.3	1.75		108	71
1	50			3	1	58.8	78	90	1.73	0.87	174	67	93	53	0.29	37	34	12	2.03	107.143	19.7606	0.65	1.15	4.1	130	80	5.4	13791	3	3	1	70	18.2782	87	1.1	0.78	214	11	71	107	42	33	11		5	0.27		140	80
2	48			1	2	62.6	72	93	0.77	0.85	191	45	130	73	0.16	13	26	16	0.34		21.5593	1.33	5.59	3.5	110	60	5.4	6705	1	1	2	66	20.8405	86	1.1	0.8	211	39	138	101	11	27	27		5.8	0.33		131	82
1	60			2	2	68.8	83	105	0.87	1.32	245	64	159	128	0.5	31	29	28	1.7	50	22.312	1.68	1.94	4.3	130	80	5.7	7347	1	3	2	84	22.5822	105	1.2	1.28	241	57	146	102	23	23	20		5.7	0.5		152	102
1	49		3	2	2	75	87	176	1.04	1.07	219	45	130	148	0.78	36	29	32	0.36		24.4618	2.56	1.68	6.7	110	70	8.1	8341	1	1	2	91	23.739	172	0.4	0.94	207	33	97	372	21	19	25		8.1	1.04		90	40
2	45			1	2	57.8	67	93	0.78	0.91	164	74	65	37	0	10	24	19	0.47		24.6591	2.32	5.29	2.8	110	70	6	9665	1	1	2	81	25.1961	98	0.8	0.88	160	67	60	69	7	22	16		6	0.13		99	54
1	61			3	1	62.7	84	105	0.67	1.34	252	39	153	195	8.89	43	36	51	1.53		24.3095	1.96	2.28	5.6	120	70	6.5	3631	3	1	1	89	24.2234	103	0.8	1.2	262	39	172	168	31	32	34		6.5	4.05		120	80
1	46			3	1	61.5	85	110	1.22	1.01	162	49	44	338	0.53	101	48	41	0.85	165	22.1843	1.17	1.53	4.4	110	70	7.7	2853	3	3	1	89	20.4674	159	1.2	0.91	218	49	107	272	66	22	16		10.6	1.96		108	79
2	47			1	2	53	69	84	0.7	0.98	149	47	78	42	0.24	10	21	15	0.38		19.1412	1.36	4.14	4.8	90	50	5.2	10617	1	1	2	72	19.9924	90	0.9	0.89	170	55	91	54	12	25	18		5.7	0.22		98.5	68.5
1	66			1	2	67.1	90	95	1.05	1.03	204	49	110	173	1.61	29	29	32	0.64		24.6764	1.57	1.81	6.9	130	80	5.6	5546	1	1	2	91	24.3446	104	0.5	1.09	174	42	101	100	24	26	22		5.5	0.97		117	73
2	61			1	2	54.3	75	92	0.99	0.92	231	47	145	103	0.77	12	26	20	0.21		21.5056	1.29	4.25	4.4	120	80	5.3	9106	1	1	2	75	21.1366	99	0.6	1	234	49	151	82	14	23	17		5.4	0.16		120	89
2	59			1	2	52.8	78	79	0.82	0.84	202	44	115	173	0.92	24	30	17	1.51		23.9754	1.4	6.83	4.3	110	80	5.4	11908	1	1	1	81	24.0313	77	1.2	0.81	212	34	142	199	26	32	23		5.5	0.27		120	80
2	52			1	1	54.3	75	93	1.09	0.75	183	48	108	82	0.26	8	21	14	1.14		20.8446	1.42	4.72	2.8	100	60	5.1	8508	1	1	1	79	21.1814	96	1.04	0.81	217	47	154	78	13	20	14	3.3	5.7			110	70
2	47			1	1	63	88	84	0.49	0.82	219	51	128	129	0.28	9	23	20	37.3		26.7029	1.24	11.39	4	110	80	5.5	12102	1	3	1	85.2	26.6702	81	0.56	0.89	234	54	138	128	11	23	24	3.9	5.4			120	90
2	60			1	2	49.6	75	75	0.44	0.76	204	57	108	147	0.89	12	26	15	0.47		20.6185	1	9.07	4.3	100	70	5.8	3302	1	1	2	74	20.1768	85	0.8	0.73	242	57	140	188	22	26	18		6	0.77		105	70
2	59			1	2	67.3	96	96	0.6	0.81	236	50	143	150	3.2	21	25	26	0.32		27.7969	2	23.46	3.8	110	70	6.1	10526	1	1	1	93	28.3721	90	0.8	0.75	208	42	140	106	15	28	26		6.2	2.57		109	69
1	41			3	2	65.4	80	85	0.88	1.06	168	42	94	83	0.3	16	28	25	0.24	104.333	24.2272	1.67	1.77	5.3	120	70	4.7	4528	2	3	2	81.3	24.5606	88	0.96	0.97	196	36	129	141	18	32	31	5.9	5.1			127	90
2	65			1	1	45.3	64	68	1.16	0.78	169	78	68	63	0.6	15	35	29	0.65		18.6622	0.84	2.36	3.1	110	70	6.3	21176	1	1	2	68	18.9876	72	1.3	0.69	221	88	100	70	11	38	25		6.5	1.42		110	60
2	48			1	1	67.4	80	84	0.74	1.07	204	43	125	136	1.41	20	23	26	0.48		27.0331	1.39	9.92	4.2	120	80	5.2	12069	1	1	2	84	27.272	74	1.1	1.08	208	44	137	47	11	25	19		5.5	0.48		118	60
2	46			1	1	51.5	75	97	0.91	0.9	130	53	50	94	0.63	10	17	16	0.27		21.1079	1.44	4.17	4.1	130	80	5.2	13546	1	1	1	73	20.1041	101	0.85	0.89	131	41	62	87	12	21	15	4.5	5.5			130	70
2	61			1	1	39.2	72	75	0.6	0.86	176	63	88	57	0.99	11	27	14	0.79		20.4356	1.2	1.4	3.6	120	80	5.3	19452	1	1	1	75	21.5241	90	0.38	0.82	173	41	103	97	12	24	13	4.3	5.9			108	71
2	67			1	1	35.4	64	95	0.97	0.67	179	77	74	90	0.24	12	19	17	0.35		16.3376	1.5	12.21	2	130	70	5.1	19976	1	1	1	72.3	16.5603	99	0.72	0.49	167	66	73	85	11	21	18	1.8	5.3			128	70
1	62			3	1	54.1	71	82	1.3	0.93	184	56	108	74	0.43	18	25	14	0.11	125	19.0319	1.07	1.46	4.7	110	80	5.3	5417	3	3	1	75.5	18.3449	90	1.4	0.95	150	42	86	66	21	25	14	5.4	5.4			98	60
1	64			3	1	68.7	90	87	0.62	0.94	199	44	94	350	1.37	81	28	32	1.68	125	26.1451	1.79	4.58	4.8	110	70	5.4	5271	2	3	1	89	26.3937	84	0.8	0.88	189	33	103	216	96	46	59		6.3	3.61		121	71
2	46			1	1	57	74	93	0.57	0.96	148	41	78	85	1	10	20	15	0.41		23.5427	1.42	12.71	3.6	130	80	5.2	11842	1	1	1	70.1	21.4074	88	0.58	0.92	172	40	112	101	10	21	12	3.6	5			130	90
2	58		2	1	1	56.2	86	139	0.82	0.95	190	36	75	445	1.09	18	31	32	1.64		23.914	2.83	6.21	4.5	130	80	7.2	8378	1	1	1	83	23.2816	162	0.7	0.92	191	37	122	161	17	24	25	4.6	8			130	70
2	59			1	1	52	87	74	0.65	0.84	146	48	73	78	0.65	11	18	15	0.4		23.3596	1.04	5.32	3.9	120	80	5.1	11381	1	1	1	84	22.6724	81	0.65	0.88	153	47	79	54	18	20	17	5.3	5.6			120	80
1	52		2	3	2	75.4	93	153	0.35	0.98	173	37	80	288	1.87	30	24	36	2.25		27.1006	12.1	2.07	4.8	100	70	7.3	2565	3	1	1	91.5	24.6044	174	0.46	0.89	197	39	118	148	29	19	23	3.8	9			112	80
2	68			1	1	41.5	69	90	0.54	0.93	229	56	121	172	0.93	12	30	12	0.25		18.6678	0.87	2.91	3.3	100	60	5.9	13526	1	1	2	73	18.2502	91	0.64	0.96	210	47	129	106	13	44	33	4	6.6			126	75
2	55			1	1	54.6	74	86	0.68	0.86	183	49	99	114	3.14	12	17	10	0.46		24.9607	1.38	7.86	4.4	90	60	5.6	10996	1	1	1	76	24.9217	83	0.4	0.87	187	43	104	130	11	18	13	4.5	6			109	60
1	51			2	1	69	88	88	0.79	1.01	179	46	101	132	1.77	27	27	41	0.13		25.8431	3.07	4.18	6.3	110	80	5.2	6986	1	1	1	88	24.1178	94	1.31	0.9	230	56	148	44	12	23	26	6.8	5.4			110	79
2	50			1	1	53.5	75	83	0.32	0.78	160	42	62	254	0.76	12	20	14	0.21		23.1257	1.41	4.91	2.6	90	60	5.5	7585	1	1	1	81	22.4953	92	0.43	0.75	164	49	89	47	10	18	14	2.3	5.9			120	80
1	58		3	2	2	71.2	97	109	0.69	1.06	238	51	135	273	3.74	48	25	23	0.24	5	25.9319	1.59	3.05	5.3	120	80	6.3	7858	1	2	1	93	25.1184	128	0.7	1.07	232	48	155	107	29	22	18	4.5	6.8			110	88
2	49			1	1	46.6	62	79	0.64	0.8	161	48	90	65	0.53	14	26	42	0.44		19.8809	1.05	2.51	3.9	100	70	5.6	19109	1	1	1	68	20.5302	83	1	0.75	190	49	108	42	9	21	19		5.7	0.3		110	70
1	52			2	1	61.3	86	99	0.77	1.19	225	76	119	51	0.93	41	32	23	0.65		23.5317	2.33	0.96	6.5	110	80	5.5	5944	1	1	1	88.5	24.5008	103	0.62	1.17	155	62	54	48	53	34	26	6.2	5.6			112	72
1	52			3	2	59.8	80	94	0.75	1	168	39	92	142	4.72	35	19	16	0.39		22.2067	1.76	1.46	5.7	110	60	5.2	4406	3	1	1	83	21.8036	93	0.6	1.01	158	42	78	137	54	28	26		5.2	0.02		120	80
2	62			1	1	54.4	77	85	0.8	0.82	162	46	80	173	4.31	13	21	15	0.18		24.6024	1.48	8.03	4.4	90	60	5.6	6571	1	1	1	82	23.8125	93	1	0.8	164	41	87	152	7	30	30		5.8	0.85		121	71
2	52		3	1	1	57.6	77	79	0.83	0.9	213	58	124	106	0.92	14	23	18	0.31		24.0681	1.42	7.42	3.8	100	70	5.8	9199	1	1	1	83	24.298	79	0.7	0.81	152	37	86	47	13	26	29		5.9	1.11		96	57
2	45			1	1	59	79	86	0.55	0.88	157	48	82	74	0.82	9	18	15	0.28		21.9363	1.4	9.47	3.6	110	70	5	11712	1	1	1	74.5	21.8618	91	0.67	0.83	156	43	94	62	11	16	12	3.9	5.3			111	79
1	50			1	1	49.9	70	84	0.79	0.89	205	80	99	48	0.93	16	28	22	0.34		18.0868	1.22	0.98	3.2	110	70	5.4	17425	1	1	1	71	17.6837	81	0.87	0.89	200	58	111	60	12	24	20	3.5	5.5			100	70
2	52			1	1	67.7	91	75	0.8	0.96	184	60	89	120	2.06	16	22	16	0.11		27.5006	2.6	21.27	4.1	100	80	5.3	5899	1	1	1	93	25.4614	87	0.8	0.86	222	50	128	148	18	21	17		5.6	1.55		101	70
1	46			3	2	95	106	94	0.42	1.18	151	37	57	361	3.2	215	70	54	5.66	29.1667	30.7387	2.53	3.72	8.3	130	80	5.1	3582	1	3	1	108	30.7658	105	1.1	1.09	139	31	71	153	79	24	17	6.5	5.4			120	80
1	65			2	2	58.7	78	94	0.82	1	188	43	114	187	1.47	30	24	16	1.38	21.6667	19.4106	1.89	1.71	5.9	100	70	5	11765	1	3	2	74.5	18.5645	96	1.17	1.02	181	48	95	172	33	26	21	6	5.7			110	80
2	62			1	2	53.2	71	101	0.61	0.91	216	50	147	126	0.29	9	22	13	0.35		22.4321	2.06	9.62	5.4	120	80	5.3	12534	1	3	2	79	22.7263	100	0.57	0.81	202	50	124	86	11	24	17	5.3	5.9			118	88
2	46			1	2	53.7	72	82	0.51	0.85	215	44	159	85	0.28	9	19	21	0.6		20.5887	2.05	4.49	3.2	110	80	5.4	8816	1	1	2	82	21.8899	88	0.3	0.69	254	54	169	68	4	21	17		5.5	0.06		130	81
2	44			1	1	59.7	74	83	0.34	0.96	212	47	143	150	1.06	17	13	12	0.9		23.5849	3.82	17.53	3.7	100	70	5.2	12438	1	1	1	77	23.6047	87	0.55	0.87	221	33	137	268	13	19	19	4.8	5.5		13.83	120	78
2	51			1	1	64.5	86	83	0.74	0.97	145	25	98	153	0.39	8	17	12	0.47		24.1282	2.36	9.04	4.6	100	70	5.2	6776	1	3	1	91.5	24.4342	88	0.78	1	162	28	96	177	12	22	23	5.6	5			130	90
2	42			1	1	65.8	82	120	1.52	0.8	156	44	101	48	0.39	10	14	9	0.54	71.4286	24.2277	1.8	5.55	3.7	100	70	5.6	5085	1	3	1	81	23.5233	118	1.6	0.71	161	52	80	104	15	16	10		6	0.36		107	78
2	62			1	1	59.2	81	87	0.89	0.84	218	68	139	86	0.5	11	22	16	0.43		23.2411	1.52	9.89	3.7	110	70	5.2	15343	1	1	1	81	23.4269	85	1	0.9	214	57	127	76	10	23	21		5.5	0.63		110	70
1	67			1	1	62.9	86	89	0.8	1.02	235	56	172	70	1.85	20	20	15	0.5	28.5714	21.4858	0.69	0.86	5.5	120	70	5.5	11458	1	3	1	85	21.9031	90	0.7	0.96	176	44	111	86	14	24	19	4.9	6			132	78
2	53			1	2	67.9	95	81	0.68	0.74	184	45	120	142	0.67	18	16	20	3.32		27.2336	2.36	8.18	5.6	120	70	5.3	6851	1	1	1	95	27.1636	84	0.68	0.66	156	38	94	73	14	18	23	4.8	5.4			138	92
2	63			1	1	67.8	92	95	0.48	0.99	170	34	103	177	1.26	18	18	10	0.38		28.4404	3	14.95	4.8	120	80	6.1	20416	1	1	2	99.5	25.2569	92	0.52	0.79	140	37	78	110	18	22	13	4.3	5.8			130	70
2	56			1	1	47.7	80	83	0.45	0.88	183	32	117	229	0.3	14	20	16	0.36		22.0441	1.93	8.55	3.5	120	80	5.5	19563	1	1	1	94.5	21.9421	91	0.93	0.74	175	36	105	156	20	29	30	3.4	5.6			130	80
1	64			1	1	67.2	86	72	0.59	1.04	229	52	165	76	0.5	21	26	28	0.23	150	23.7529	0.59	2.14	3.9	110	60	5.1	17494	1	3	1	87.2	23.4046	91	0.7	0.95	220	40	155	74	18	26	28	5.3	5.4			102	66
2	62			1	1	47.5	77	81	0.49	0.84	176	42	124	84	0.41	12	23	11	1.05		20.1331	0.86	9.53	3.1	130	80	5.8	10650	1	1	1	67.7	18.2886	90	0.46	0.82	167	31	113	93	10	23	13	3.7	6			140	77
2	56			1	1	61	81	74	0.94	0.88	223	48	152	148	0.41	12	19	15	0.36		24.5282	0.65	11.42	3.1	100	70	5.2	18851	1	1	1	87	25.9189	84	1.26	0.87	212	43	143	107	11	21	18	3.1	5.5			120	80
2	44			1	1	49.4	67	88	0.47	0.85	149	43	88	86	0.35	15	14	12	2.65	6.66667	21.2974	1.6	6.16	3.3	100	70	5.2	11236	1	3	1	66.3	20.5484	92	0.72	0.81	140	38	77	74	13	14	9	3.3	5.5			108	68
2	54			1	2	56.1	78	88	0.79	0.89	146	47	61	195	0.44	18	25	21	0.35		21.4557	2.22	11.43	4	110	70	5.5	12378	1	1	2	74	21.2163	91	0.8	0.9	210	48	112	180	17	26	24	5.6	5.2		10.49	100	60
2	46			1	1	54.7	68	80	0.64	0.96	211	55	144	85	0.38	14	18	10	0.35		20.7403	0.99	9.14	5.9	120	80	5.2	13840	1	1	1	74	20.9283	86	0.87	0.86	256	73	170	72	11	22	11	5.8	5.6			108	68
2	41			1	1	69.2	83	82	0.54	0.83	241	47	173	153	0.64	16	18	14	0.34		27.3036	2.05	13.17	4.3	110	70	5.6	7173	1	1	1	89	27.3328	89	0.93	0.81	244	42	158	132	18	21	20	4.5	5.9			110	70
2	40			1	1	43.8	62	88	1.31	0.77	172	46	91	101	0.17	10	19	13	0.32		18.7352	1.71			108	66	5.2		1	1	1	69	18.766	91	1.26	0.8	170	39	97	83	9	19	14	3.8	5.4		3.87	112	62
2	41			1	2	57.7	82	86	0.83	0.84	152	41	85	37	0.17	13	27	27	0.65		24.4883	1.06			103	61	5		1	3	1	76	24.743	96	1.18	0.93	152	43	83	71	16	25	25	3.3	5.3		9.98	97	60
1	42			2	1	55.8	71	83	1.05	1.1	213	45	132	80	0.14	11	22	17	0.78	4.16667	19.422	1.09			130	76	5		1	3	2	80	19.712	95	0.98	1.16	227	47	144	90	10	25	24	5.4	5.3		1.13	111	71
1	46			2	2	67	86	136	0.67	1.13	179	34	103	144	0.57	48	29	33	0.51	144.286	23.7669	1.91			126	77	6.8		1	3	2	82	23.1753	125	0.63	1.11	165	34	91	165	56	35	36	6.2	7.2		2.5	110	60
2	49			1	1	57.8	74	92	1	0.76	206	64	112	44	0.2	11	17	11	0.44		24.0893	1.7			116	64	5		1	1	1	71.5	22.8981	88	0.79	0.8	206	65	104	76	9	18	16	4.2	5.5		6.86	110	70
2	43			1	2	58.1	74	81	1	0.86	120	43	48	77	0.65	17	18	13	0.95		22.3033	1.2			106	72	4.9		1	1	1	86.5	22.314	88	0.76	0.88	150	37	72	147	24	20	17	3.7	4.7		9.02	102	66
1	60			3	2	61.5	82	88	0.63	0.99	221	50	132	106	0.78	17	22	19	0.41		22.4532	1.17			103	63	5.4		3	1	2	82	22.3276	83	0.61	1.15	247	36	167	174	22	23	20	7.8	5.7		2.46	106	72
2	58			1	1	46.8	78	88	0.89	0.77	199	40	110	206	0.21	18	27	19	0.28		23.0471	1.73			135	64	5.5		1	1	1	82	22.9121	94	0.8	0.81	192	32	118	204	13	25	15	3.3	5.7		10.96	121	79
2	58			1	1	43.9	66	91	1.08	0.87	270	57	180	80	0.36	23	26	19	2.26	28.5	20.5385	1.17			134	71	5.3		1	3	1	73	20.6311	90	0.89	0.92	222	44	127	221	18	22	16	4.5	5.8		5.12	111	70
2	59			1	1	44.8	64	89	0.64	0.79	207	42	139	86	0.44	31	31	23	1.38	5	18.1984	1.04			121	73	5.4		1	1	1	65	17.87	84	0.54	0.86	202	34	136	165	18	26	17	6.3	5.8			111	70
2	55			1	2	66.5	83	92	0.76	0.81	151	43	83	68	0.36	9	26	12	0.24		26.2383	1.58			131	79	5.5		1	1	2	87	26.7522	85	0.59	0.93	177	46	98	116	14	18	20	5	5.6		11.55	135	82
2	51			1	2	59.4	74	86	0.7	0.84	159	51	85	48	0.3	9	13	14	0.22	16.1905	23.6146	1.31			126	78	4.9		1	3	1	79	23.9611	95	0.68	0.95	167	42	97	113	12	13	14	3.8	5		14.46	134	84
1	40			1	1	78	91	103	0.62	0.96	193	36	117	196	0.55	36	34	51	0.56	41.6667	25.2094	3.35			139	85	5.5		1	3	1	91.3	24.8333	103	0.71	0.94	192	36	114	238	39	26	40	6.6	5.6		1.96	126	89
2	42			1	1	63	80	82	1.63	0.92	158	56	73	63	0.29	41	29	34			23.1967	1.91			123	81	5.1	8187	1	1	2	78	23.0047	87	1.48	0.92	157	52	75	98	32	22	21	4.9	5.3		5.38	108	71
2	66			1	1	56.3	83	84	0.97	0.83	227	35	145	204	0.54	21	22	17			22.5811	2.63			129	77	4.6	9588	1	1	2	77	22.0574	85	0.66	0.93	215	36	136	128	11	23	14	4.2	5.1		9.47	105	50
2	53			1	1	69.9	90	104	1.13	0.9	289	50	194	124	3.01	19	36	37			29.8994	2.72			136	79	5.5	14279	1	1	1	93	29.5102	97	0.9	0.91	224	39	139	175	14	35	35	5.4	5.7		14.38	92	50
2	47			1	1	69	87	93	0.66	0.77	205	32	129	136	0.42	9	14	13		28.6667	27.57	2.46			121	67	5.4	6892	1	3	1	92	27.9155	99	0.49	0.81	209	38	148	101	11	16	15	2.7	5.8			118	74
1	56			3	1	69.8	98	92	0.66	0.98	232	37	149	183	0.52	40	24	19		67.5	26.6294	3.19			126	73	5.3	20201	3	3	1	89.2	26.4659	88	0.92	0.97	201	40	139	145	29	26	15	5.6	5.6			132	62
2	55			1	2	57.7	91	93	0.79	0.83	241	49	154	92	0.46	14	32	28			27.4057	1.8			139	85	5.4	30909	1	1	2	92	26.9885	97	0.67	0.96	199	36	121	202	13	21	15	5.6	5.3		15.78	118	80
2	59			1	1	51.4	85	99	0.75	0.84	223	51	128	115	0.23	10	19	16			22.0149	2.28			134	72	5.3	15559	1	3	1	76.4	22.9788	93	0.95	0.82	256	53	174	95	11	21	19	4.7	5.6		5.45	116	77
2	63			1	1	55.9	79	91	0.71	0.77	224	51	126	153	2.84	17	27	18		5	23.8174	2.41			130	83	5.2	18368	1	3	1	82.3	24.1452	86	1.07	0.77	227	52	152	95	15	23	15	4	5.4			110	70
2	47	1	3	1	1	60.5	78	100	1.13	1	189	43	109	109	0.4	11	15	19			25.2472	2.67			105	68	6.5	23918	1	1	1	81.7	25.2616	111	0.89	0.93	190	42	116	85	12	22	21	4.4	6.8		9.77	109	70
2	55			1	2	58.8	83	96	0.58	0.83	225	38	143	112	2.28	24	26	25		8.33333	22.5162	2			126	65	5.7	16379	1	3	2	78	21.101	96	0.75	0.88	255	38	180	96	15	20	18	5	5.7		6.44	129	70
2	49			1	2	63.4	86	96	0.63	0.72	263	45	173	110	0.41	15	22	14	1.69		26.6983	2.35			125	78	5.4	11314	1	1	2	88.2	27.3166	96	0.56	0.76	326	46	243	136	51	30	43	5.7	6.1			118	70
2	44			1	1	45.3	71	83	0.71	0.89	212	49	128	72	0.62	16	19	20			20.3498	1.03			122	78	5.3	15166	1	1	1	69.8	20.7476	88	0.69	0.87	205	54	127	60	11	21	20	3.4	5.7			100	60
2	47			1	2	56.4	79	84	2.06	0.83	170	44	98	55	0.64	12	20	15			22.8521	1.98			139	82	5.2	15352	1	1	2	77	22.9624	90	1.86	0.86	217	46	134	123	18	39	32	5	5.3		9.38	151	98
2	56			1	1	48.1	62	81	0.81	0.72	235	60	132	81	0.39	19	24	10			19.1222	1.16			138	87	5.1	48425	1	1	2	69	19.8215	88	0.71	0.67	258	59	175	79	32	41	36	2	4.9		5.49	122	88
2	48			1	1	48.6	68	94	0.54	0.79	162	44	85	77	0.17	11	30	23			21.0908	1.94			123	76	5.2	24976	1	1	2	76.5	21.4662	90	0.73	0.85	141	39	73	73	11	22	13	3.3	5.2		4.66	112	70
2	60			1	1	60.9	82	85	0.54	0.82	225	37	127	300	0.7	21	22	19			25.4799	2.02			129	75	5.3	17917	1	3	1	85	24.7367	91	0.66	0.94	249	41	145	310	29	23	24	5.9	5.9		11.49	120	70
1	60			2	1	74.4	94	91	0.63	0.99	199	35	128	86	0.58	52	64	86			28.6314	3.77			128	86	5.7	15144	1	1	2	95	27.1884	80	0.64	1	180	31	108	155	26	30	37	6.8	5.7		3.34	100	76
2	60			1	1	67	82	98	0.62	0.69	247	40	162	147	3.87	27	18	13			28.4353	3.95			126	68	5.4	17085	1	1	1	94.5	28.8728	93	0.91	0.71	238	51	140	207	41	38	50	2.9	5.9		17.45	129	81
2	52			1	2	52.3	69	90	0.72	0.97	196	39	102	213	0.46	12	24	11		14.6667	22.1965	1.75			131	73	5.7	23142	1	1	1	82	24.5404	95	0.66	0.91	193	39	129	100	15	24	21	4.9	5.4			116	70
2	50			1	2	61.1	77	89	0.85	0.82	172	33	107	104	0.91	17	21	18			24.0472	2.5			121	79	5.6	7365	1	1	2	78.4	23.8111	93	0.85	0.86	176	35	97	248	15	24	27	4.6	5.7			98	60
2	50			1	1	59.5	81	90	0.44	0.79	240	41	153	158	0.61	16	29	39			26.304	2.73			127	80	5.5	12258	1	1	1	82	25.9952	95	0.65	0.82	220	39	151	123	13	23	31	3.8	5.6		9.42	119	81
2	58			1	1	42.7	69	92	0.59	0.77	212	41	141	50	0.31	10	28	12		12.1667	17.9116	1.65			124	66	5.5	17831	1	2	2	73.5	18.6309	90	0.88	0.79	248	42	186	103	9	23	15	3.9	6.1		13.04	129	74
2	52			1	1	59.5	85	92	0.46	0.78	221	35	146	159	2.63	15	25	26			24.5437	2.21			137	82	5.3	3734	1	1	1	83	22.6923	94	0.55	0.9	243	42	172	113	12	23	16	5	5.6		6.27	130	80
2	45			1	1	54.7	76	94	0.55	0.86	176	42	104	118	0.29	9	22	28			21.0764	3.19			132	70	5.2	9754	1	1	2	79	21.2976	97	0.72	0.93	196	51	108	114	17	44	62	4.1	5.1		14.89	100	70
2	44			1	1	60.6	76	101	0.41	0.9	151	32	87	170	0.52	6	22	19			25.1588	2.69			118	73	5.5	2615	1	1	1	83.3	23.7115	103	0.52	0.96	162	47	87	55	8	14	9	4.6	5.6		11.61	100	60
1	52			3	1	56.3	79	74	1.32	1.03	210	43	137	124	0.58	35	25	23	0.32	28.5714	20.0429	1.02			128	67	5.2	11173	3	3	1	79.5	20.2094	90	1.78	1.11	196	45	129	73	25	30	18	8.2	5.2			118	62
2	46			1	2	52.3	76	81	0.81	0.71	130	37	76	36	0.6	10	17	14			22.9072	1.04			113	62	4.9	8512	1	1	2	72	21.6101	98	1.47	0.76	175	40	109	105	15	17	14	4.1	5			99	68
2	45			1	2	52.9	76	95	0.78	0.74	200	45	126	68	1.21	9	15	14		70.6667	24.0208	2.12			120	69	5.3	18063	1	3	2	79	23.6845	100	0.63	0.8	236	37	167	115	13	15	15	3.7	5.4			98	66
2	45			1	1	65.5	85	98	0.56	0.99	232	45	141	186	0.95	7	19	18			24.9581	3.21			112	74	5.4	8506	1	1	1	88.2	27.8139	101	1.24	1.1	294	51	192	145	9	21	17	3.7	5.7		14.58	109	72
2	45			1	1	57.7	77	106	0.41	0.67	169	42	102	61	1.38	29	19	17	0.29		22.095	4.4			108	70	5.1	11687	1	1	1	76.4	22.0676	91	0.49	0.71	172	34	104	140	18	23	21	4.1	5			100	71
2	42			1	1	45.7	63	78	0.61	0.73	189	55	104	68	0.38	8	20	11			20.502	1.61			109	62	4.9	17118	1	1	1	66	20.8549	78	0.51	0.75	186	48	103	77	9	19	14	3.5	5.6			110	70
1	49			2	2	70.5	81	97	0.64	1.06	210	52	125	119	0.4	11	19	18			23.583	1.69			121	68	5	13179	1	1	2	88	23.6195	96	0.85	1.14	210	55	118	104	12	21	21	6	5.3		2.03	100	70
2	44			1	2	52.3	68	96	0.74	0.85	187	46	112	88	1.89	5	17	11		5	21.3537	2.19			117	68	4.8	16973	1	3	2	71	21.5048	87	0.53	0.9	202	50	124	75	7	21	17	3.4	5		3.92	110	80
2	44			1	2	52.8	67	93	1.04	0.75	250	43	166	152	0.3	20	16	17		26.6667	21.7241	3.68			107	67	4.9	5391	1	3	2	75	22.1767	94	0.76	0.81	215	31	137	243	15	15	13	3.8	4.9			120	80
1	46			2	1	63.5	79	77	1.37	1.03	191	35	129	53	0.5	13	28	13		28.5714	22.6331	0.75			102	59	5.1	5362	1	3	1	78.2	21.3594	74	1.09	0.94	195	43	132	38	12	24	24	5.1	5.4			110	70
2	61			1	1	55.2	85	100	0.71	0.93	189	31	114	243	0.89	15	20	16	0.33		23.7667	3.52			133	84	5.5	11234	1	1	1	94.6	22.3367	102	0.6	0.86	179	29	105	216	12	18	12	3.8	5.8		7.63	109	78
1	44			1	2	62.6	87	120	1.31	1.09	205	35	127	166	1.39	122	38	57		185.714	24.1203	1.8			127	88	5.4	4268	1	3	1	85.1	23.0129	108	1.1	1.1	193	31	115	254	50	28	34	6.6	5.3		2.76	110	71
2	67			1	1	53.4	87	112	0.52	0.83	224	34	118	385	3.31	28	16	20			23.5134	2.69			121	75	5.8	2189	1	1	2	83.5	23.7076	118	0.59	0.79	217	34	129	318	40	24	30	5.1	5.9		11.44	102	66
1	53			1	1	55.2	76	94	1.03	1.13	196	39	115	131	0.33	15	27	27			19.6748	2.28			134	80	5	5872	1	1	1	74.5	18.8512	86	1.03	0.99	189	48	113	101	15	31	43	5.9	5.5		0.91	110	70
2	51			1	2	57.3	76	98	0.52	0.93	168	44	92	72	0.34	7	18	13			22.6368	2.02			120	78	5.3	6247	1	1	2	81	23.9009	84	0.43	0.87	195	43	114	150	12	22	16	3.9	5.6		11.9	118	70
2	61			1	1	51	78	84	0.53	0.92	211	33	142	124	1.36	19	27	22			22.6063	1.53			114	70	5.2	7640	1	1	1	73.5	21.1718	87	0.67	1.06	223	42	146	86	19	22	16	4.8	5.1		7.81	140	90
2	51			1	2	63.4	87	105	0.86	0.84	271	42	190	131	2.99	19	23	16			26.9074	2.19			133	80	5.4	4032	1	1	2	90.1	26.8319	96	0.78	0.78	309	48	218	208	21	20	16	5.1	5.7		22.03	120	80
2	52			1	2	67.4	84	89	0.83	1.04	198	68	91	58	0.31	10	28	32			26.2952	1.58			115	61	5.3	12609	1	1	1	92.3	26.4603	91	0.65	0.95	153	48	56	192	30	23	23	5.2	5.3			132	90
1	43			2	2	69.3	89	89	0.66	1.04	170	42	103	44	0.22	9	16	15		64.6667	23.5616	1.38			134	81	5.1	7378	1	3	2	84.7	24.0376	90	0.88	1.14	187	38	126	70	12	20	16	8	5.1		2.2	111	70
2	68			1	1	50.8	79	96	0.95	0.84	217	42	133	112	4.7	6	20	15	0.65		26.4446	2.07			118	75	5.4	11432	1	1	1	87	26.4791	96	0.68	0.82	225	48	148	79	9	25	22	4.3	5.7		18	99	70
2	52		2	1	2	57.7	77	86	0.7	0.85	144	35	80	140	1.01	18	31	26			24.3929	4.98			115	71	6.2	7383	1	1	2	94.5	24.3191	108	0.76	0.92	175	35	100	208	23	27	23	4.4	6.3		7.14	104	79
2	64			1	1	63	86	69	0.38	0.89	165	30	103	68	11.99	43	42	63			26.9127	1.34			120	68	5.4	6740	1	1	1	84	25.8945	71	0.64	0.96	205	33	137	130	73	45	64	4.4	5.5			99	62
2	44			1	1	64.4	80	100	0.66	0.91	247	38	158	199	0.46	83	25	38			26.1268	5.48			121	74	5.8	6435	1	1	2	82.5	25.3237	103	0.53	0.93	175	35	100	176	49	28	38	6.4	6		13.24	98	52
2	46			1	1	63.3	76	101	0.39	0.79	152	39	90	43	0.06	7	16	16		35	24.7575	2.16			101	60	5.3	16001	1	1	1	83.5	26.629	96	0.38	0.81	147	38	85	64	16	15	11	4	5.6			100	60
1	52			2	1	72.1	82	85	1.23	0.91	227	48	144	73	0.23	38	26	28		51.1667	25.5153	2.58			131	87	5	4275	1	3	2	83	24.2215	87	1.38	0.91	198	49	120	52	26	28	25	5.7	5.3		1.33	110	79
2	50			1	1	48.1	72	88	0.97	0.74	204	54	117	62	0.67	7	15	14		10.6667	20.0467	1.22			120	74	5.5	8408	1	3	1	81.7	20.1249	94	0.73	0.75	212	49	128	106	9	18	20	4.3	5.9		6.14	100	60
2	60			1	2	54.7	85	82	1.1	0.83	217	37	133	217	0.57	13	25	25			24.0858	1.55			130	78	5.3	4525	1	1	1	82	24.5798	93	0.81	0.85	224	42	148	189	18	21	17	6	5.7			112	62
1	40			1	2	59.8	74	89	0.76	1.09	213	33	129	219	0.63	44	23	38		144.667	22.6741	1.92			130	77	5.3	2513	1	3	2	78	22.6718	92	0.93	1.13	218	37	129	280	65	22	28	7	5.6			120	80
2	50			1	2	52.2	76	93	0.91	0.79	202	61	101	79	0.16	40	28	19			23.3554	1.26			131	83	5.2	12629	1	1	2	81	23.5211	89	0.78	0.83	218	72	107	89	33	25	26	3.7	5.1		10.25	122	60
2	55			1	1	51.3	76	82	0.9	0.84	213	46	116	170	0.49	72	27	31			22.3507	1.43			120	77	5.2	14932	1	1	2	76	22.1032	80	0.9	0.89	241	57	142	125	40	20	20	5.4	5.1		6.26	105	70
1	51			3	2	71.2	84	88	0.95	0.82	166	41	76	188	0.3	38	23	26			25.7142	1.26			100	67	5.4	8728	3	1	2	87.5	25.3531	89	1.11	0.88	175	44	93	108	33	19	23	6.4	5.2		3.86	109	70
2	53			1	2	46.6	68	81	0.8	0.83	220	63	113	95	0.2	15	21	12	0.5		19.4466	1			137	83	5	11306	1	1	2	75.5	19.9117	80	0.87	0.87	229	59	129	111	17	21	15	3.9	5.1		3.21	130	80
2	62			1	2	53.6	77	89	0.96	0.83	253	50	163	85	2.07	25	22	20			21.6349	1.08			100	58	5.4	12951	1	1	2	83	23.0657	97	0.78	0.81	281	46	190	129	35	21	21	3.7	6.1			124	70
1	57			2	2	66	81	94	1.08	1.06	199	34	120	159	0.74	39	39	52			22.5447	1.91			137	70	5.3	5521	1	3	2	87	22.144	95	1.01	1.22	205	36	125	151	51	36	52	8.2	5.4		3.39	110	70
2	59			1	1	56.6	72	87	0.79	0.82	157	56	69	63	0.83	28	22	14			23.5892	1.62			129	83	5.2	26613	1	1	2	84	22.0206	87	0.83	0.8	184	62	94	52	47	20	19	4	5.3		5.91	118	72
1	66			1	2	65.1	80	102	0.98	1.11	217	38	140	139	0.53	43	32	21		25	21.7766	1.09			127	78	5.4	5783	1	3	1	81	20.3874	102	1	1.07	213	32	157	89	26	24	15	5.2	5.6		2.02	114	60
1	44			3	2	57.8	81	100	0.75	1.04	202	44	128	100	0.46	17	20	13		125	20.3335	1.36			118	75	5.6	7029	3	3	2	81.5	19.9328	105	0.63	1.03	183	38	107	196	20	24	18	5.8	5.3		2.22	116	79
2	50			1	2	57.2	84	86	0.71	0.81	233	55	151	105	0.52	29	31	21			24.6602	1.19			138	88	5.6	21655	1	1	1	85	24.7132	98	0.69	0.86	252	47	179	87	37	38	32	4.8	5.5		8.74	121	60
2	41			1	1	74.4	98	91	0.42	0.71	182	39	112	136	3.78	10	20	10		28.5714	30.4158	1.26			135	73	6.1	5519	1	3	1	110	30.8303	92	0.48	0.79	210	49	132	121	20	22	15	5	5.9		23.55	122	62
2	40			1	1	50.2	67	87	0.49	0.76	128	48	66	48	0.14	6	18	14	0.4		20.3919	1.65			124	75	5.1	10404	1	1	1	71	20.1118	88	0.57	0.76	131	46	70	40	13	17	11	2.7	5.2			100	70
2	55			1	2	58.8	81	91	0.92	0.75	179	53	106	51	0.2	7	31	20			23.2586	1.32			120	70	5.6	13151	1	1	2	81	24.1922	88	0.72	0.81	184	44	111	63	11	24	16	2.8	6.2			102	60
2	50			1	1	61.6	77	126	0.67	0.91	183	45	120	67	1.88	7	19	12	0.37		26.9093	2.32			131	70	5.9	11463	1	1	1	79	30.1098	132	0.74	0.91	175	41	112	71	7	20	16	4.5	6		6.12	109	70
2	52			1	1	86.3	95	93	0.72	0.85	183	40	120	84	6.89	9	21	24	1.11	3.33333	34.0934	2.01			115	75	5.7	11783	1	2	1	103	34.1655	101	0.94	0.82	196	39	132	72	8	21	19	4.5	5.4		14.65	115	87
1	69			3	2	52.2	72	76	0.54	1.16	186	48	109	90	2.56	13	35	22		16.6667	19.8412	0.85			113	67	5.4	7184	2	3	2	78	19.314	92	1.19	1.11	172	49	90	113	17	36	30	4.4	5.6		0.96	98	71
2	62			1	2	52.8	66	88	0.59	0.88	165	54	94	39	0.33	6	31	9			21.7241	1.02			115	73	5.9	18084	1	1	1	74	21.7971	97	0.77	0.88	169	51	89	80	9	34	14	4.7	6.1		3.74	108	75
2	67			1	1	59.1	82	102	0.54	0.9	173	37	111	149	0.48	6	25	18			26.1619	2.3			133	75	6	9731	1	1	2	85	26.6576	100	0.45	0.97	196	35	114	232	15	26	22	4.7	6.2		1.19	124	82
2	60			1	1	53.9	80	79	0.55	0.78	158	33	108	68	3.24	7	29	22	0.49		22.7568	1.05			118	65	5.8	10407	1	1	1	84	22.6349	82	0.49	0.86	173	29	110	101	16	23	22	0.6	5.3		4.66	118	70
2	47			1	1	59.5	74	94	0.95	0.86	230	51	152	140	3.24	8	23	14			23.6842	2.99			137	88	5.1	13134	1	1	2	83	23.1269	84	0.87	0.85	206	45	122	121	11	19	13	4.1	5.4		8.42	110	70
2	60		2	1	2	62.7	84	152	1.08	0.86	159	56	83	55	0.37	14	26	30		12.3333	25.0527	3.91			135	68	7.9	4870	1	3	2	87	24.122	180	0.91	0.97	154	56	70	52	15	23	22	3.7	8.3		10.91	110	67
2	41			1	2	54.6	77	91	0.64	0.85	165	31	113	117	0.22	9	26	21			22.5224	1.81			119	70	5.4	5594	1	1	2	77.8	23.0883	93	0.51	0.83	185	30	116	173	13	19	16	3.1	5			110	70
2	46			1	2	56.9	78	86	1.41	0.88	178	65	86	72	0.36	20	18	12		8.33333	21.4159	1.96			130	83	5.1	12186	1	3	2	80.5	21.6083	81	0.99	0.89	178	67	78	60	19	18	13	3.9	5.3		6.37	129	90
2	69			1	1	52	78	89	0.8	0.73	161	54	87	77	0.76	8	18	10		71.4286	23.5486	1.17			131	76	5.2	17668	1	3	1	82	21.132	77	0.78	0.64	192	63	113	43	11	22	18	4.9	5.1		2.58	110	70
2	44			1	2	62.4	76	103	0.6	0.87	214	36	148	151	0.78	49	33	57			24.5897	2.85			130	75	6.4	9469	1	1	2	78	24.2706	97	0.68	0.87	240	37	159	229	38	25	23	5.5	6.3			110	70
2	57			1	1	61.4	80	97	0.93	0.78	231	33	164	106	0.23	16	26	24		45	25.1978	2.35			120	80	5.8	7153	1	3	2	86	26.6752	107	0.72	0.76	247	49	149	197	48	41	48	3.6	5.5		13.37	140	100
2	50			1	2	49.3	72	83	0.68	0.9	167	30	114	81	0.18	11	22	8			23.6108	2.13			117	68	5.2	6914	1	1	2	84.2	23.2921	87	0.59	0.93	188	27	125	149	13	26	19	4.4	4.7			96	58
1	51			1	2	64.3	81	107	0.8	0.93	192	55	105	102	0.54	48	27	18	0.33	134.286	22.2491	2.28			132	87	5.6	10264	1	3	2	83.4	22.3432	98	0.67	0.86	219	54	140	60	32	21	16	5.2	5.8			118	70
2	51			1	1	53.2	73	85	0.63	0.77	210	60	123	74	0.12	17	24	15	0.46		22.0298	0.99			126	76	5.3	11443	1	1	1	75	22.0712	92	0.61	0.8	229	61	141	100	16	24	24	3.6	5.6		3.88	110	69
2	56			1	1	52.1	70	86	0.96	0.99	217	60	126	99	0.21	15	29	13			21.9968	0.92			115	70	5.4	7109	1	1	2	76.5	20.987	85	1.04	0.94	192	54	114	72	9	26	12	4.1	5.5		2.82	106	70
2	55			1	1	52.6	73	88	0.67	0.92	183	39	112	88	0.68	14	25	16		67.5	22.47	1.49			124	76	5.2	9095	1	3	1	84	22.4114	92	0.71	0.94	252	43	171	123	26	29	22	5.5	5.4		7.63	100	60
1	70			1	2	65.8	78	116	0.95	1.23	223	50	144	134	0.27	14	20	11			23.0384	1.66			130	74	6.3	7247	1	1	2	86.6	23.5835	107	0.88	1.26	254	44	163	238	13	26	18	4.2	6			112	71
2	65			1	1	52.4	77	91	0.92	0.84	192	54	110	84	0.34	15	20	11			22.6205	1.3			119	70	5.6	6793	1	1	1	79	23.4591	92	0.64	0.84	182	57	97	101	13	33	28	4.2	5.7			120	66
2	46			1	1	53.1	68	86	0.52	0.96	187	49	112	54	0.9	10	15	11			20.8202	1.63			116	65	4.7	12678	1	1	2	71	19.7924	80	1.09	1.01	198	60	111	48	11	19	12	4.5	5.3			110	70
1	65			2	2	66.9	81	90	0.64	1	138	36	72	90	0.59	22	29	19		3.33333	23.4235	2.27			123	75	4.6	13936	1	2	2	74	20.5413	96	0.79	1.01	148	47	76	69	26	49	40	5.3	6.2		1.02	99	60
1	44			1	2	61.3	80	89	0.81	0.95	154	32	91	121	0.38	11	21	7			21.5648	1.55			114	64	5.6	14842	1	1	2	81	20.2374	94	0.81	1.04	169	31	96	164	12	20	8	4.6	5.1		4.42	100	70
2	41			1	1	51.1	73	90	0.81	0.68	172	43	101	78	0.18	24	23	35			21.8578	1.64			104	68	4.9	9898	1	1	2	77.7	21.7	95	0.75	0.75	213	45	134	97	24	20	27	4.5	5.1		9.89	100	76
2	50			1	1	64	77	99	0.69	0.98	202	47	132	40	0.69	11	19	14			25.0626	1.54			129	74	5.3	8556	1	1	1	84.5	23.5547	92	0.65	1.05	169	38	108	41	11	17	12	4.1	5.6		11.49	110	78
2	61			1	1	62.1	83	111	0.46	0.82	209	47	136	72	1.04	29	28	26			26.3557	3.26			130	79	5.8	12827	1	1	1	87	25.8215	89	0.58	0.81	198	48	125	81	48	28	48	4.9	5.9		12.93	100	70
2	59			1	1	49.2	76	90	0.64	0.78	163	47	83	90	0.58	18	22	15		26.6667	22.0722	1.75			139	89	5.2	20688	1	3	2	92.1	22.1746	95	0.67	0.86	194	39	135	107	26	22	15	4.1	5.2			112	70
2	49			1	1	55.9	79	100	0.79	0.82	234	45	138	214	0.52	14	25	24			24.3549	2.81			135	78	5.3	13460	1	1	2	80	23.8147	91	0.91	0.89	233	40	152	194	11	31	37	5.3	6			118	80
2	55			1	2	49.9	70	87	0.46	1.13	202	43	122	93	2.71	30	21	14		16.6667	22.1778	1.35			136	77	5.3	8935	1	3	2	75.5	22.7556	96	0.63	0.95	221	37	140	164	33	26	21	4.3	5.4		4.03	130	80
2	56			1	1	65.7	90	87	0.41	0.83	206	55	112	82	0.47	13	25	18		16.6667	28.6246	1.73			134	83	5.7	17607	1	3	1	91	28.9456	89	0.38	0.82	236	47	137	275	28	33	72	5.8	5.9		12.07	130	80
2	47			1	1	54.1	74	92	0.91	0.88	171	49	79	117	0.13	17	34	31			20.8452	4.53			98	63	5.2	14344	1	1	1	77	21.1053	89	0.72	0.98	185	49	106	111	17	23	16	3.7	5.3		5.77	92	60
2	43			1	1	55.8	80	95	0.38	0.9	170	56	79	75	1.11	8	20	12			25.9283	1.47			120	78	5	5034	1	3	1	78	24.495	85	0.38	0.87	170	42	90	134	15	17	12	3.9	5		6.68	106	86
2	43			3	1	52.6	69	91	0.37	0.95	204	39	111	188	0.42	6	16	9			19.5568	2.6			121	66	5.3	13260	3	1	1	69.5	19.3636	92	0.34	0.99	214	36	103	448	7	18	11	3.9	5.8		6.35	104	69
2	59			1	1	77.7	83	103	0.76	0.94	196	37	115	126	1.77	13	27	33			28.2311	2			134	82	6	9884	1	1	1	87	27.6437	122	0.75	0.97	211	44	135	59	19	20	35	5.3	6.6			140	90
2	50			1	2	53.1	68	92	0.63	0.89	266	78	146	73	0.46	6	25	21		3.33333	21.8756	1.36			137	86	4.9	17051	1	3	2	78	22.4563	89	0.81	0.85	235	59	153	90	13	23	16	3.8	4.9			110	77
2	55			1	1	57.2	70	92	0.54	0.85	181	69	73	60	0.22	6	19	11			23.088	1.76			122	76	5.1	16047	1	1	2	90.3	23.2058	91	0.65	0.8	200	74	97	55	9	19	14	4.8	5.5		7.07	109	77
2	55	1		1	1	59.8	76	94	1.12	0.78	244	49	147	123	0.4	27	26	29		11.6667	23.3886	1.48			127	78	5.2	15544	3	3	1	81	22.5294	85	1.24	0.79	219	40	147	173	19	28	20	5.1	5.7			130	80
1	40			3	1	79.3	87	112	0.64	0.99	202	32	100	456	2.83	124	24	24		178.571	27.798	4.56			126	77	5.3	6406	3	3	2	91.5	25.7511	105	0.4	1.02	193	36	103	376	114	29	31	7	5.3			118	82
1	51			3	1	56.8	78	89	1.11	1.04	168	41	92	118	0.59	12	25	15			22.1598	0.8			120	70	4.8	13307	3	1	1	79.5	22.66	98	0.91	1.07	139	35	83	65	17	22	14	5.1	5.3			100	70
1	61			2	1	60.7	70	94	0.56	1.11	144	30	78	165	0.43	8	25	16			20.1182	1.71			101	65	5.7	17585	1	1	1	79	19.7907	87	0.82	1.06	133	27	83	79	10	23	17	1.8	6		1.5	100	69
2	53			1	2	56.7	69	101	0.79	0.92	206	54	124	62	1.16	8	29	14			24.0326	1.94			114	69	5.3	9245	1	1	2	73.5	23.1849	92	1.02	1.04	168	58	83	61	11	26	15	5	5		4.91	118	70
1	69			3	1	65.6	81	90	0.73	1.04	183	26	116	193	1.22	22	21	16			24.5097	1.48			130	66	5.5	4557	3	3	1	86	24.5247	88	0.76	0.98	168	27	100	161	25	22	16	4.8	5.3			150	70
1	59			1	2	55.1	74	84	0.91	0.97	172	36	95	185	0.53	12	26	15		181.024	20.362	0.98			115	74	4.8	13849	1	3	1	79.2	20.6812	84	1.22	0.94	184	39	113	182	17	23	14	5	4.9		1.21	112	70
1	53			2	2	62.2	78	101	0.73	1.04	206	36	124	199	0.35	37	33	34		32	22.1697	2.74			134	86	5.5	6174	1	1	1	83	21.4936	103	0.38	0.96	203	49	128	106	56	26	27	4.7	5.3			132	88
1	66			1	2	63.4	85	83	1.14	1.19	166	44	88	96	0.38	10	22	20		76.6667	22.98	1.03			119	67	5.4	16230	1	3	2	89.6	23.3787	91	0.88	1.18	177	39	109	103	13	21	15	4.7	5.5		2.43	129	70
2	43			1	1	48	62	79	0.97	0.84	168	58	79	64	0.07	8	24	9		28.6667	18.7266	2.7			104	65	5	22813	1	3	1	68.7	20.4319	85	0.33	0.76	133	40	69	37	13	19	6	4.1	5.4			84	62
2	67			1	1	52.1	74	92	1.38	0.89	205	57	111	101	0.38	11	20	14			24.7459	1.83			133	84	5.5	20973	1	1	2	85	24.4946	90	0.88	0.98	194	48	108	205	12	29	35	5.5	5.8			140	82
1	55			1	1	73.7	91	124	1.02	1.04	214	52	131	70	0.64	12	33	29			24.5398	2.86			127	81	6.4	9561	1	1	1	97	24.9879	92	0.75	0.91	181	45	115	51	11	28	20	3.6	6.5			118	70
2	53			1	1	52.1	67	87	0.87	0.92	164	42	91	92	0.62	10	31	28			22.5206	1.35			115	72	5.7	25059	1	1	1	81.5	24.1739	80	0.63	0.75	154	42	90	55	12	24	16	3.5	5.5			110	70
2	63			1	1	51.5	80	97	0.74	0.89	162	32	98	97	0.37	10	29	18			20.8402	2.31			112	66	5.4	16117	1	1	1	83	20.4977	108	0.56	0.86	150	29	79	179	11	26	18	3.9	5.7		6.13	99	70
2	62			1	1	53.1	85	98	0.68	0.78	224	40	134	197	0.41	40	37	16			21.4877	2.12			119	69	5.3	29112	1	1	1	89	19.7881	95	0.85	0.72	176	42	102	96	36	30	24	3.8	5.5		5.15	118	89
2	61			1	1	71.1	91	84	0.74	0.86	235	61	133	129	2.12	15	24	24			29.291	2.28			118	66	5.5	12384	1	1	2	98	30.3018	89	0.53	0.76	253	62	162	130	15	22	25	4.9	5.7		28.43	126	80
2	62			1	1	48.5	66	86	1.04	0.83	219	46	138	61	0.58	14	26	16	2.48		20.4503	4.65			130	75	5.2	11054	1	1	1	79.5	21.2034	90	0.69	0.75	243	46	167	66	13	28	23	5.6	5.6		5.8	108	70
2	51			1	2	53.8	68	99	0.81	0.94	337	43	239	196	1.1	18	22	17		21.4286	22.597	1.68			125	69	5.9	15059	1	3	2	80	22.4451	98	0.41	0.94	314	43	233	239	17	18	15	5.1	5.6			120	70
1	57			1	2	60.2	77	103	0.64	1.16	126	40	57	52	0.46	11	23	17			22.8257	1.6			133	71	6	5539	1	1	2	84	23.3782	112	0.56	1.17	167	35	98	171	14	23	19	6.3	6		2.93	131	81
1	52		2	3	1	72.1	86	124	0.76	1.22	185	32	111	137	7.46	42	16	15		87.5	26.1334	2.68			130	83	8	4077	3	3	1	93	26.387	208	0.86	1.1	175	32	85	352	30	16	11	3.6	8.5			128	90
2	54			1	1	55.2	74	83	0.99	0.76	200	58	103	93	0.25	27	29	31			23.0355	1.85			116	75	5.5	16709	1	3	1	77	22.1902	82	0.67	0.86	217	48	138	94	13	26	19	4.2	5.4			112	71
2	57			1	1	59.5	81	81	0.8	0.83	201	43	122	56	1.18	24	20	23		43.1667	23.6245	1.65			117	65	5.6	4953	1	3	1	87.2	25.2844	87	0.72	0.91	184	41	117	46	21	23	23	5.5	5.6			108	70
1	56			1	1	63.2	80	95	1.28	1.03	211	45	130	84	0.6	17	22	17	0.35	125	21.766	1.41			123	79	5.4	11915	1	3	1	84.2	23.1538	97	1.01	1.08	178	43	108	75	14	21	22	6.6	5.4			110	70
1	70			1	2	63	81	85	1.43	0.93	241	44	158	79	0.21	20	23	20			24.0352	1.77			114	72	5.2	5284	1	1	2	84	23.3208	89	1.15	0.98	193	35	123	175	13	24	14	4.1	4.9		1.31	128	80
1	54			1	1	50.7	72	102	0.99	1.09	196	46	98	195	0.29	12	31	21	0.68	147.857	19.5109	1.41			127	87	5.4	10400	1	3	1	72	18.9572	104	0.53	1.12	153	37	80	165	12	26	18	6.3	5.3			120	80
2	57			1	1	33.6	60	89	0.93	0.87	232	60	115	204	0.11	6	30	14			16.2488	4.81			126	82	5.7	15949	1	1	1	65	17.6537	85	0.42	0.88	199	51	120	85	11	31	13	3.1	5.9			100	70
2	65			1	2	50.6	69	84	0.88	0.71	231	42	145	144	0.39	12	26	23	0.4		22.7918	1.45			122	62	5.6	11178	1	1	2	92	22.4765	80	0.52	0.77	211	43	142	102	13	22	18	3.4	5.6		3.94	136	88
2	60			1	2	70.4	83	94	0.94	0.89	274	49	179	107	0.61	23	24	17		12.5	25.3948	1.71			113	74	5.5	8151	1	3	1	83	24.3893	85	0.58	0.82	168	43	99	95	18	22	17	3.7	5.9			100	60
2	46			1	1	46.9	70	88	0.81	0.81	157	40	82	59	0.13	7	23	8		52.619	21.8225	0.9			103	62	5.2	9203	1	3	1	70	21.6393	93	0.71	0.78	222	54	145	103	12	23	7	5.2	5.7			104	62
2	45			1	1	60.2	83	93	0.96	0.82	164	54	81	46	0.2	14	22	17		28.5714	25.2524	1.24			131	75	5.1	14222	1	3	1	88	26.7825	90	0.69	0.81	215	56	138	138	17	22	17	5	5.4			120	80
2	58			1	2	69.6	93	86	0.86	0.89	192	40	112	120	0.96	23	27	15			25.6891	1.61			131	80	5.6	20558	1	3	2	88.5	25.0248	87	0.89	0.82	193	46	129	105	21	20	14	5.3	5.3			119	80
1	55			2	2	62.8	79	99	0.72	0.95	249	66	140	72	0.4	45	28	19		186.571	22.1977	1.18			138	80	4.8	7433	1	3	2	81	20.1727	101	1.02	0.91	228	61	136	81	54	24	16	4.7	5		1.02	111	74
1	56			3	1	64.4	71	90	1.28	0.9	188	54	94	84	0.41	41	40	50		16.6667	23.6261	1.9			125	75	5.3	5943	3	3	2	82.5	23.2311	96	1.25	0.96	188	51	107	76	46	43	56	4.3	5.3		2.05	118	78
2	50			1	1	72.7	91	98	0.73	0.87	223	49	127	122	0.52	11	31	25	0.38	36.6667	27.0961	2.21			131	75	6	11026	1	3	1	90.2	26.5321	98	0.42	0.83	220	54	136	107	12	26	23	4.4	5.7			110	84
1	58			1	1	69.8	96	95	0.67	0.99	136	33	72	65	0.69	23	30	30			27.9957	2.19			139	86	6.1	5308	1	1	1	92.3	26.1628	92	0.8	0.87	124	27	75	54	15	24	21	4.6	5.8		2.59	120	80
2	55			3	1	62.5	80	85	0.67	0.8	165	55	72	83	0.27	9	23	17			25.2273	1.26			125	83	5.3	26258	3	1	1	74	21.7008	84	0.54	0.79	169	59	78	99	11	24	17	2.6	5.4		8	107	70
2	54			1	1	49.3	62	81	1.13	0.91	203	64	100	86	0.38	8	16	16			20.1546	0.98			121	64	5.4	18281	1	1	1	71	20.7069	87	0.91	1	218	54	138	82	12	18	13	5.5	5.3			100	70
2	41			1	1	61.1	74	82	0.6	0.94	125	32	58	126	0.98	36	30	37			24.5996	2.86			135	80	5.2	5261	1	3	1	73	22.2266	90	0.52	0.96	146	35	85	82	14	20	12	3.4	5.7			110	70
1	47			3	1	70.5	87	134	0.79	1.02	147	32	77	136	1.38	31	19	16		46	24.5676	2.24			135	79	6.9	6338	3	3	1	88	23.6266	129	0.58	1.07	162	34	99	73	29	18	17	3.5	6.5			109	72
1	44			3	1	54.9	75	101	1.02	1.01	237	43	141	221	1.52	48	23	12		71.4286	20.6632	2.16			126	81	6.1	3949	3	3	1	74.3	19.4272	104	0.85	0.94	201	42	116	195	35	17	11	5.3	6			110	62
2	41			1	2	46.4	65	81	1.13	0.74	209	54	118	62	0.15	8	23	15		15.3571	20.6222	1.28			122	77	4.8	18200	1	3	1	80	21.1512	77	0.83	0.7	218	56	128	129	11	32	32	3.3	5.1			100	68
2	49			1	1	72.4	95	90	0.74	0.81	178	36	101	153	1	19	21	26			34.0583	3.23			125	76	5.6	8055	1	1	1	97.2	34.3403	101	0.7	0.81	175	37	110	158	24	23	31	5.5	5.4			119	76
2	53			1	2	55.3	79	94	0.97	0.8	195	47	120	81	0.17	11	19	17	0.33		25.4871	2.3			130	82	5.5	10873	1	1	2	84	25.6478	93	0.56	0.81	181	46	103	102	24	28	33	4.9	5.4		11.22	124	75
2	63			1	1	61.2	86	88	0.84	0.84	215	48	139	71	0.79	34	15	22			25.7385	2.41			118	72	5.5	23549	1	1	2	90	25.6645	89	0.75	0.84	184	40	122	91	29	20	19	3.7	5		11.14	110	66
1	61			2	2	67.6	82	90	0.51	1.38	210	31	140	146	2.11	126	50	24			23.557	2.64			135	80	5.6	8160	1	1	1	87.1	22.6348	92	0.63	1.31	225	40	146	117	53	18	16	5.6	5.5		5.5	119	88
1	47			1	2	81.1	88	108	1.36	1.04	151	40	83	89	0.27	17	24	26			24.1377	4.16			135	78	5.6	3261	1	1	2	89	24.5156	106	1.25	0.88	164	36	103	93	17	24	25	7	5.6		3.47	110	60
2	44			1	1	65	75	83	0.67	0.78	186	39	118	143	1.07	8	24	20			26.8124	1.91			131	84	5.8	13233	1	1	1	84.5	25.3123	88	0.58	0.81	199	42	115	162	11	22	16	3.3	5.4		17.32	118	78
2	63			1	2	51.1	67	88	1.51	0.93	198	59	108	110	0.63	8	22	16			23.1411	1.15			107	62	5.7	14894	1	1	2	86	23.0028	94	1.58	1.01	217	66	125	104	12	26	20	5	5.5		10.51	81	50
1	66			1	2	75.2	88	101	1.04	0.91	179	33	105	185	0.55	14	24	25	1.14		25.8078	2.42			136	77	5	11035	1	2	2	89	25.917	101	0.54	0.94	227	42	149	179	13	23	23	7.6	5.1		1.78	118	79
2	60			1	2	45.4	73	112	0.62	0.83	239	45	157	179	0.29	15	29	23		18.5	21.653	2.58			122	78	5.8	9387	1	3	2	78	20.8331	107	0.95	0.93	225	54	141	56	33	27	21	5.5	6.2		4.21	120	80
2	61			1	2	47.1	67	92	0.92	0.87	192	38	131	116	0.21	9	26	19	1		20.3058	2.88			136	80	5.4	11287	1	1	2	76	21.295	90	0.82	0.93	195	32	104	293	12	28	23	4	5.1		7.3	120	78
1	64			1	1	54.7	75	81	0.73	0.98	236	43	166	90	0.86	16	30	23			18.4254	0.98			105	75	4.9	18031	1	1	1	80	18.8497	95	0.65	0.97	223	44	148	133	19	19	14	2.4	5.1			120	80
2	59			1	1	49.3	75	88	0.59	0.69	272	45	188	190	3.12	24	46	33			22.5988	2.18			122	71	5.7	12053	1	1	1	87.5	22.8298	88	0.52	0.84	240	65	133	170	20	31	23	7	5.9			146	80
1	64			2	1	59.6	80	89	0.67	1.1	161	29	100	168	4.45	17	33	30			24.2412	2.05			134	82	5.1	5740	1	1	1	83	24.4784	85	0.91	1.12	177	29	113	113	21	33	33	8.4	5.3		2.39	110	70
2	49			1	2	58	74	85	0.58	0.89	196	34	139	71	0.66	8	27	33		20.5	23.3515	3.11			127	77	5.5	9735	1	3	1	78.4	25.1068	89	0.5	0.95	215	29	152	173	13	22	27	4.9	5.7			120	80
2	58			1	2	52.9	77	80	0.77	0.87	201	28	145	119	1.27	17	19	23			23.3241	1.24			131	75	5.2	8913	1	1	2	82	22.4136	77	0.75	0.94	181	33	128	104	15	20	16	5.1	4.9		5.94	110	70
2	53			1	2	49.3	67	83	0.52	0.83	187	55	99	102	1.15	7	21	13			19.4274	1.97			130	69	5.1	13598	1	1	2	70	19.3913	80	0.86	0.91	202	53	126	72	14	26	15	3.5	5			119	74
2	43			1	2	51.9	69	79	0.81	0.72	147	40	85	57	0.19	2	22	13			21.1363	1.17			108	65	4.7	6893	1	1	2	70	21.654	86	0.74	0.83	157	39	99	70	10	25	18	3.9	4.6		5.88	95	49
2	64			1	1	53.6	85	89	0.81	0.81	185	40	121	69	9.36	11	21	17	0.59		23.6642	1.36			126	72	5.5	10713	1	1	1	76	21.9716	87	0.85	0.82	200	39	126	116	11	21	14	3.9	5.2		4.96	129	88
2	52			1	1	57.4	81	95	1.34	0.79	192	37	129	93	0.37	7	23	15	0.57		22.478	1.87			134	74	5.2	10444	1	1	2	84	22.1187	90	1.85	0.85	216	34	160	60	12	28	22	4.8	5.6		2.89	128	89
2	45			1	2	54	64	82	0.98	0.74	172	54	92	85	3.62	14	22	19		10.3333	21.2795	0.8			117	81	5.1	18780	1	3	2	68	21.0965	80	1.52	0.78	206	58	127	63	16	23	23	5.2	4.7		3.86	108	68
1	54			3	1	66	90	91	1.32	0.93	206	47	128	158	4.22	43	23	20		50	23.5242	2.96			134	78	4.5	13115	3	3	1	94.5	22.4012	89	0.91	0.89	211	40	134	190	43	20	20	6.8	4.1		3.23	131	82
2	57			1	1	59.3	81	88	0.77	0.67	183	40	118	78	1.21	48	20	12			25.3321	2.18			112	58	5.3	9054	1	1	1	85	25.728	92	1.29	0.73	217	42	151	82	31	19	15	3.3	5.6			100	60
2	55			1	1	59.2	77	84	1.23	0.84	184	48	99	139	7.87	6	38	25	0.53	12.5	23.865	2			116	72	5.2	11399	1	3	2	82	23.2277	84	0.97	0.97	200	48	119	76	10	29	22	3.5	5		6.47	118	70
2	57			1	2	54.8	80	90	0.36	0.91	212	64	119	110	1.23	14	30	14			22.6049	2.29			122	66	5.8	35098	1	1	1	81	22.4647	93	0.58	1.07	254	58	162	92	14	26	8	5.8	5.9			120	80
1	55			2	2	69.2	94	91	1.41	0.81	157	31	93	137	3.96	97	35	44		58.3333	23.3096	1.7			121	81	5.2	5887	1	3	2	91.8	25.1642	94	0.75	0.92	182	42	106	134	76	30	22	6.7	5		4.64	130	72
2	53			1	1	59.9	82	104	0.96	0.7	160	34	98	64	0.79	25	18	18			26.6934	2.85			119	69	5.7	4269	1	1	1	89	26.7469	98	0.56	0.81	180	40	119	83	37	27	28	4.7	6.1		0.82	138	80
1	55			3	1	70.7	91	92	1.05	1.14	193	42	117	72	3.75	10	22	17	0.38		26.6426	1.74			130	70	5.7	10213	3	1	1	84	25.1044	99	0.65	1.19	206	39	127	83	12	17	12	6.4	5.5		1.69	120	78
2	55			1	1	66.3	97	92	1.37	0.72	252	45	171	127	0.97	19	29	39	0.35		26.5247	1.74			139	83	5.5	11685	1	1	1	94	27.425	92	1.35	0.78	203	34	100	425	12	21	23	3.7	5.7		3.07	140	90
1	43			1	2	65.9	79	94	1.11	0.99	206	33	133	199	0.3	33	23	24			23.2106	1.57			133	66	5	4337	1	3	1	85	22.972	95	0.83	1.14	215	30	148	157	38	29	31	5.6	5.3		1.67	102	70
2	46			1	1	54.2	72	87	1.13	0.75	146	26	86	144	0.7	9	21	14			23.1535	2.6			133	71	5	4666	1	1	1	75.5	22.5981	92	1.14	0.92	162	26	107	114	13	16	17	4.4	5		6.93	109	70
1	50			1	1	72.4	86	81	1.1	1.01	192	31	120	153	0.13	8	18	20			25.5606	1.2			136	81	5.5	9188	1	1	1	92	24.3565	90	0.76	1.19	188	32	129	87	10	25	24	6	5.5		1.27	122	90
1	56			2	1	74	92	87	1.67	0.98	175	33	95	216	0.3	28	33	35		27.1667	28.7982	2.32			120	73	4.9	3607	1	3	1	91.2	28.7045	98	1.14	1.09	191	51	108	112	30	27	30	7.8	4.6		7.29	109	74
2	46			1	1	59.4	75	84	0.84	0.8	133	43	62	67	0.79	4	23	14			22.6058	2			115	65	4.9	9518	1	1	2	76	21.6615	84	0.8	0.9	146	51	70	44	10	20	18	4.2	4.7		7.32	107	71
2	48			1	1	49.6	70	92	0.68	0.82	176	44	102	68	0.2	6	17	10			20.3032	2.34			112	65	5.3	8930	1	1	1	70	19.9493	86	0.66	0.87	197	42	126	104	8	27	18	4.9	5.1		4.46	92	60
2	47			1	2	56.5	82	88	0.87	0.78	157	35	91	100	0.33	16	23	22			24.4546	2.41			130	85	5.1	8198	1	1	2	86.5	23.8682	86	0.52	0.74	194	36	117	169	20	32	42	3.8	4.9		9.46	118	70
2	51			1	2	52.8	73	82	0.96	0.75	184	59	95	90	0.32	6	27	25			21.4207	1.23			121	72	5.2	9441	1	1	2	72	20.6836	83	1.32	0.77	195	52	119	44	10	21	19	3.7	4.8		3.55	120	79
2	65			1	1	53	79	88	0.87	0.81	202	46	116	159	0.23	8	20	15			25.0351	4.84			122	73	5.3	13198	1	1	1	84	24.7054	90	0.58	0.7	159	38	87	153	9	20	13	3.3	5.5			122	70
2	64			1	1	52.8	69	78	1.12	0.79	207	47	121	130	0.73	16	20	13	1.55		21.7799	1.82			138	82	5.3	10271	1	1	1	74	20.592	82	0.97	0.77	202	54	117	120	16	21	12	4.9	4.9		3.94	140	90
2	62			1	1	61.4	82	96	1.23	0.76	216	24	154	152	3.01	13	16	10			25.9909	2.19			138	81	6.4	18904	1	1	1	87	25.6161	96	1.31	0.76	211	31	148	201	17	28	22	4.9	6.2			125	78
1	69			1	2	57.3	83	93	0.9	0.96	174	49	97	86	0.61	30	23	20	0.38	100	21.3824	0.97			139	80	5.7	11270	1	3	2	76.3	20.7748	98	0.7	0.92	181	48	108	68	42	33	28	4.9	5.4		1.16	133	89
2	48			1	2	49	68	88	0.61	0.88	172	31	107	104	6.43	9	20	13			21.7488	2.48			108	66	5.7	15018	1	1	2	70	22.4423	92	1.11	1.03	216	48	136	81	10	22	16	4.4	5.3		4.88	109	72
2	59			1	2	65.7	92	95	0.63	0.82	176	37	105	92	6.45	19	25	34			26.7223	3.53			131	79	6	15009	1	1	2	92.5	26.282	97	0.87	0.86	200	41	130	90	17	34	47	4	5.3		11.72	131	76
1	54			2	1	66.4	83	101	0.69	1.04	210	36	118	327	1.24	37	33	49		41.6667	22.2115	3.53			124	85	5.6	2389	3	3	1	82	20.4958	98	0.74	1.03	212	43	116	297	35	28	28	6.2	5.5			110	70
1	58			1	1	84.3	95	87	1.2	1.03	244	61	148	71	0.33	28	32	38	2.06		27.6528	2.32			133	85	5.3	10178	1	1	1	95	27.519	82	1.22	0.99	217	55	139	81	20	26	24	6.6	5.7		8.92	110	78
2	68			1	1	52.5	82	84	1.1	0.86	206	44	136	58	1.25	7	24	20		27	23.2403	2.61			118	64	6.1	12506	1	3	1	83.1	23.4717	89	0.66	0.86	190	43	115	111	8	25	20	2.9	5.7			111	70
2	70			1	2	55.3	72	91	0.93	0.97	220	51	130	117	0.33	12	21	14			22.3779	1.35			125	70	6.4	13926	1	1	2	85	22.7592	108	0.83	0.93	222	47	138	161	11	25	19	5.7	6		2.5	100	60
2	48			1	1	53.2	68	94	0.67	0.93	155	31	95	91	0.11	8	19	16			22.5198	7.52			123	71	5.7	9716	1	1	1	75.2	22.9779	94	0.69	0.82	156	34	99	79	11	15	15	3.7	5.1		5.37	112	80
1	49			1	2	80.3	98	92	1.58	1.05	161	33	93	148	0.38	14	20	37			26.7065	2.48			139	87	5.3	2724	1	1	2	95.2	27.4333	89	2.54	1.01	182	31	126	104	21	31	58	8	5.1			112	60
1	53			1	1	70.8	81	94	1.13	1.05	226	54	137	83	0.32	12	27	27			25.974	1.87			127	83	5.6	13621	1	1	2	84	24.9231	91	1.16	1.02	218	54	136	72	12	23	19	4.6	5.5		3.18	109	70
1	47			1	1	73.9	86	91	0.93	1.09	181	40	109	107	0.73	16	23	17	0.28	13	22.4332	1.43			116	76	5.5	10982	1	3	1	90.5	23.5556	118	0.83	1.14	180	41	117	89	18	22	10	5.8	5.3			130	90
2	55			1	1	60.2	77	91	1.56	1.02	200	44	122	101	0.1	8	23	13			24.0538	2.07			125	72	5.2	7241	1	1	2	80.5	24.2813	88	1.76	1.1	214	47	141	153	12	24	17	4.9	5.4			120	68
2	51			1	1	58.9	85	86	0.77	0.77	188	64	95	60	0.33	4	17	12			25.1613	1.98			136	78	5	15035	1	1	1	80	24.6704	90	0.9	0.85	223	53	135	107	12	35	37	3.9	4.9			150	90
2	64			1	1	48.4	70	85	0.81	0.85	197	46	126	59	0.45	10	22	11			21.6842	1.01			128	75	5.5	21360	1	1	2	89.5	23.0195	82	0.77	0.72	184	37	126	105	11	23	14	3.6	4.8		2.36	140	80
1	57			1	1	73.2	87	92	0.5	1.1	166	36	106	39	1.53	17	29	30			23.6581	1.99			138	82	5.7	9305	1	1	1	86	23.3521	89	0.9	1.09	182	36	113	74	19	34	46	5.4	5.1		2.79	131	90
1	62			1	1	55.9	72	93	0.71	1	221	78	108	106	0.25	24	26	27		124.238	20.988	2.35			120	75	5.3	14719	1	3	1	79	22.2127	87	0.89	0.94	205	71	96	162	30	21	17	5.2	5.3			128	88
1	67			1	2	58.6	85	89	1	1.04	181	30	122	68	0.86	22	21	18		62.5	22.2464	2.16			120	64	5.2	6496	1	3	2	81.5	22.0934	86	1.09	0.97	167	29	118	93	20	21	19	6.9	5		2	102	62
1	64			3	1	95.1	118	91	0.65	0.9	231	53	138	143	1.64	40	42	42		16.6667	31.9226	3.16			139	81	5.8	5997	3	3	2	116.2	32.1155	81	0.73	0.92	212	51	135	83	34	52	52	5.8	5.5		18.54	134	90
2	49			2	2	58	69	92	0.48	0.94	232	56	134	97	0.15	13	26	28		6	21.83	2.45			126	81	5.4	4666	1	1	2	75	22.2296	92	0.63	0.91	195	52	110	66	17	25	17	3.8	5.2			120	80
2	42			1	1	56.5	73	90	0.56	0.8	208	52	117	111	0.38	8	17	8			24.3904	2.12			107	61	5.4	9079	1	1	1	76	24.5412	94	0.6	0.81	235	70	135	102	14	18	10	3.9	5.6			110	70
2	56		3	1	2	60.4	79	96	0.74	0.9	236	41	154	141	0.51	6	22	23			23.9215	2.37			128	80	5.5	7780	1	1	2	85	24.4661	99	0.89	0.96	223	38	155	99	13	21	18	7.1	5.4		8.17	131	80
1	57		2	1	1	63.4	86	232	0.34	1.33	219	45	146	59	1.24	16	32	38			22.3566	8.44			138	75	8.4	6202	1	1	1	81	21.4711	158	0.22	1.25	189	39	127	90	27	27	23	5.2	8.5			120	80
1	49			1	1	83.8	93	88	1.48	1.17	204	35	126	204	0.24	54	35	57			29.1679	4.06			130	81	5.2	5251	1	1	1	94.3	30.422	94	1.27	1.14	203	36	131	228	65	51	81	2.9	5.2		10.08	120	90
1	62			1	1	57.7	78	91	0.59	0.96	210	43	132	111	0.34	7	22	14			18.1295	2.16			139	84	5.4	14704	1	1	1	74	17.746	90	0.65	0.89	183	41	120	90	13	22	18	5.8	5.3		1.28	110	60
2	53			1	1	61.8	84	93	0.64	0.84	185	39	114	136	0.24	11	17	20			26.3656	3.63			124	71	5.5	12600	1	1	1	83.5	26.4751	92	0.49	0.8	205	43	140	112	18	19	17	3.9	5.6			128	90
2	54			1	2	60.9	85	99	0.61	0.81	155	39	92	74	0.56	6	21	18			24.9606	7.52			131	80	5.8	12997	1	1	2	83	24.9105	96	0.5	0.8	154	31	107	82	11	19	14	4.3	5.9		5.56	118	78
2	43			1	1	56.8	83	89	0.37	0.79	136	39	68	57	0.51	4	17	12			24.6818	4.19			109	60	5.2	4949	1	1	1	82	24.9335	89	0.53	0.82	147	42	77	81	11	20	16	3.9	5.7			90	60
2	46			1	2	53.2	71	84	0.92	0.87	155	46	71	101	0.29	9	23	13			20.8073	0.92			128	79	5.3	8732	1	1	2	71	20.9117	83	1.05	0.77	211	63	118	128	13	23	17	3.9	5.6			110	72
1	67			1	1	72.9	95	100	0.59	0.94	206	47	123	75	0.41	7	22	21			26.1707	1.02			115	64	6	14162	1	1	1	92	26.7771	119	0.7	0.93	223	53	139	78	12	24	22	3.9	6.4			120	80
1	42			2	2	71.3	82	111	0.66	1.06	174	48	88	94	0.35	19	20	18	0.36		22.8876	1.78			126	83	5.9	11712	1	1	2	83	22.9396	115	0.9	1.03	191	51	106	93	23	15	12	5.3	5.9			120	80
2	54			1	1	63.9	84	87	0.61	0.83	231	61	132	87	1.01	36	26	19			27.5126	5.68			137	81	5.8	15951	1	1	1	88.5	29.8671	89	0.54	0.75	236	63	135	90	42	39	30	0.8	5.4			118	68
2	66			1	2	63.6	80	97	1.29	0.88	260	42	178	167	2.15	11	22	14	0.72		26.3363	1.88			135	71	5.4	11011	1	1	2	92.3	26.7841	92	0.8	0.92	169	33	96	197	13	24	17	5.3	5.8			110	72
1	61			2	2	76.6	91	128	1.61	1.06	146	35	78	128	2.17	29	27	16		144.286	25.6235	2.67			123	79	5.2	5527	1	3	2	89	25.2004	114	0.7	1.06	166	26	46	495	25	24	18	7	5.1		1.62	140	80
2	59			1	2	54.3	74	78	1.12	0.86	214	60	120	91	0.13	12	26	18			23.0153	1.17			127	71	5.7	12440	1	1	2	73	21.3741	87	0.7	0.9	233	60	146	106	11	23	19	3.4	5.3		3.66	118	70
2	65			1	1	47.1	86	89	0.67	0.84	225	39	145	179	1.73	24	15	16			23.7583	2.48			128	65	6	6624	1	1	1	82	23.287	102	0.52	0.83	177	35	113	125	21	18	15	4.1	6.2			130	80
2	67			1	1	50.2	86	95	1.1	0.89	242	36	164	160	4.09	14	29	26			22.0458	2.1			129	68	5.5	8751	1	1	1	81.3	22.3262	90	0.55	0.92	199	31	137	165	16	22	21	6.4	5.5			120	62
2	48			1	1	48.4	81	98	0.83	0.87	209	32	137	144	15.45	7	24	15			22.3069	2.12			105	69	5.9	7972	1	1	1	75	22.3569	94	0.68	0.97	222	30	165	156	13	22	14	5	6			115	68
2	59			1	2	49.7	82	83	0.89	0.84	143	68	44	62	0.19	10	24	18			21.2868	1.81			136	81	5.9	15576	1	1	1	80	20.595	96	0.57	0.83	147	72	50	66	15	22	20	4.2	5.6			111	80
2	46			1	2	57.9	72	91	1.15	0.93	224	64	126	103	0.06	8	17	9			22.1168	2.58			92	55	5.4	16395	1	1	1	73	22.0294	94	0.75	0.88	216	53	132	91	14	21	26	2.9	5.2		9.73	94	51
2	49			1	1	67.3	88	122	0.92	0.84	223	33	147	164	0.32	14	23	11			26.9588	2.84			130	85	6.9	3408	1	3	1	90.5	26.5997	172	0.62	0.88	257	41	189	137	32	28	29	3.6	8.7			110	80
1	51			1	1	65.9	86	109	1.09	0.93	181	34	83	379	0.7	22	24	29	0.63		25.0178	3.75			112	73	6.6	11613	1	1	1	85.5	23.7701	126	0.96	0.87	171	31	100	233	16	19	21	5.7	6.3		3.88	112	84
2	50			1	1	49.2	70	87	0.8	0.7	199	66	102	60	0.7	7	23	16			20.8537	2.49			134	77	4.7	4648	1	1	1	80	20.8656	82	0.78	0.71	180	50	100	118	9	22	15	3.8	4.4		3.77	104	74
2	55	3		1	2	74.7	89	110	0.91	0.83	214	39	131	157	3.3	15	28	33			32.0363	7.87			137	86	6.2	14815	1	1	1	99.2	33.4148	104	0.72	0.76	218	44	144	115	15	54	52	6.2	6.4			121	80
2	49			1	1	60.8	74	88	1.29	0.75	181	51	102	73	0.13	4	24	24			23.6907	2.6			100	57	5.3	5909	1	1	2	76	23.418	90	0.78	0.89	176	38	109	107	12	17	12	2.5	5.2		10.27	108	70
2	50			1	1	59	82	89	1.78	0.84	189	46	114	72	0.13	6	28	9			22.5369	2.65			104	64	5.7	12184	1	1	1	77	23.4661	89	0.88	0.92	211	45	145	79	11	25	17	4.4	5.6			102	60
2	46			1	1	49.8	69	96	0.92	0.73	215	60	120	100	0.07	14	18	24			19.3562	3.21			121	62	5.2	8258	1	1	1	66	19.0234	95	0.48	0.88	182	54	104	75	13	18	10	3.2	5.8			120	80
2	50			1	2	53.1	67	82	1.14	0.79	188	70	85	67	0.2	5	16	10			20.1833	1.77			98	64	5.2	8088	1	1	2	72.5	20.3103	91	1.04	0.85	218	63	121	68	14	20	14	4.8	5.3			100	70
2	54			1	1	70.6	81	84	0.86	0.88	178	35	111	73	0.53	6	20	13			25.345	1.73			125	73	5.1	16720	1	1	1	81.8	25.9768	84	0.91	0.93	199	40	133	104	13	21	19	3.7	5.2			118	78
1	55			3	2	59.2	77	105	1.21	1.04	210	63	99	141	0.24	27	19	15		50	19.3306	2.67			115	66	6.1	3352	3	3	2	73	19.4403	117	1.11	1.05	189	68	92	98	33	21	16	5.1	6.2			118	74
1	47			3	1	66.4	87	92	1.49	1.07	195	37	113	164	0.41	39	28	26		185.667	22.9758	1.34			119	70	5.5	5950	2	3	1	82	22.3612	98	0.47	1.19	165	42	101	95	41	36	29	6	5.6			119	80
1	53			2	2	57.9	78	89	1.42	1	195	32	127	119	1.52	17	24	14		137.5	22.1441	1.36			132	74	4.9	2510	1	3	2	78.2	21.7886	90	1.09	0.89	216	33	142	194	23	22	17	6.5	4.8		1.49	120	80
2	48			1	2	53.4	76	83	1.2	0.74	207	47	120	116	0.34	7	17	9			21.6366	1.51			123	80	5.4	9837	1	1	2	75.2	21.2856	92	1.07	0.72	242	46	170	141	13	20	19	5.4	4.9		8.92	102	69
1	40			3	1	62.9	80	89	0.61	0.92	167	34	86	208	0.32	22	13	12			24.5396	1.68			129	78	5.8	2709	3	1	2	87.3	25.7466	94	0.5	0.97	161	31	107	110	27	15	13	5.3	5.7			108	60
2	55			1	2	45.5	64	82	0.8	0.83	220	68	116	70	0.3	15	23	18			19.9025	1.17			109	67	5	18695	1	1	2	75	20.1764	84	0.86	0.93	243	66	145	81	18	33	32	3.6	4.7		6.08	108	76
2	50			1	2	55.1	77	85	0.8	0.8	234	41	148	123	0.18	10	21	15			23.2937	1.46			104	63	5.4	5659	1	1	2	82	23.1285	84	0.54	0.79	192	38	120	150	10	24	16	4.1	5.1		9.09	100	60
1	53			2	1	78	101	85	0.57	1.26	163	34	91	142	0.41	17	15	17			26.427	2.12			124	75	5.3	9224	1	1	1	104	27.2858	93	0.5	1.26	207	34	134	176	27	23	33	8.6	4.9		12.37	122	86
2	41			1	2	50.6	61	91	1.79	0.81	194	74	83	63	25.36	10	16	11			20.6069	2.43			128	79	5.6	25913	1	1	2	68.2	20.5309	91	0.59	0.92	161	46	79	111	13	15	10	3.8	5.8			124	70
2	51			1	2	58.9	75	102	1.08	0.62	224	49	133	124	0.28	9	16	12			22.9791	2.37			110	62	5.7	13654	1	1	1	72	21.8633	104	0.46	0.75	180	42	106	74	12	21	15	4.1	5.9			110	76
2	54			1	2	64.7	85	116	1.25	0.73	219	49	125	119	3.34	23	32	33			25.1475	2.62			131	72	5.5	13515	1	1	1	85.5	23.9725	88	1.31	0.88	220	44	143	73	15	17	14	5.3	5.7			116	80
2	55			1	1	58.3	85	90	0.65	0.66	160	40	62	284	0.62	12	25	18	0.32		26.5444	2.2			132	72	5.4	11965	1	1	1	84	25.6663	87	1.37	0.73	157	38	74	175	15	29	29	4.6	5.4			134	90
2	43			1	2	66.9	91	99	0.78	0.76	179	37	106	81	2	15	15	7			29.773	2.35			136	82	5.5	4429	1	3	1	99	30.5666	97	0.73	0.73	224	42	161	97	20	16	11	4.7	5.8			150	100
2	55			1	2	78.5	93	133	0.89	0.78	200	58	104	87	2.12	16	31	31			32.2154	4.94			136	81	5.6	6506	1	1	2	100	31.9692	101	0.5	0.8	163	43	75	183	13	33	32	3.7	5.8		14.26	126	84
1	48			2	1	83.5	96	108	0.68	1.26	232	28	158	166	4.94	51	28	37			27.8994	3.67			135	87	6.6	3356	3	3	1	97	26.1122	97	0.99	1.1	150	29	76	253	69	28	30	6.1	6.1			128	88
2	46			1	1	53.4	69	88	0.71	0.77	171	44	95	54	0.24	7	20	17	1.31		21.2829	2.05			108	60	5.3	10000	1	1	2	77	21.5911	87	0.69	0.81	164	46	90	57	7	13	9	2.7	5.2			110	78
2	52			1	1	49.2	72	92	1.48	0.72	253	49	164	82	1.07	22	24	18			19.5842	2.3			121	72	5.6	15214	1	1	1	81	20.7222	93	1.49	0.78	286	57	206	76	12	26	19	4.2	5.1		3.93	126	80
2	40			1	1	47.5	63	78	1.4	0.84	189	61	95	77	0.23	17	21	14		62.8571	19.3691	1.34			119	73	5.3	20815	1	3	1	65.5	19.3462	80	1.43	0.87	200	57	110	92	18	22	12	4	5.1			120	80
2	50			1	1	64.5	82	92	1.31	0.84	210	41	115	167	10.96	11	17	16	0.79		24.0399	2.16			127	75	5.6	10617	1	1	1	82.4	23.5638	94	0.89	0.92	211	35	143	146	12	21	20	5.3	5.4		8.01	111	70
2	59			1	1	52.8	75	88	0.79	0.7	249	56	151	78	0.14	22	20	15			21.312	1.56			111	58	5.7	14281	1	1	2	73	21.2987	96	0.34	0.79	155	47	77	54	15	22	14	3.1	5.9			102	62
1	62			1	1	55	79	95	1.68	0.97	127	52	46	52	0.23	8	28	20			19.4176	1.68			128	78	5.3	15135	1	1	2	78	19.9359	94	1.22	1.05	127	43	56	54	10	22	15	4.2	5.2			119	80
2	52			1	1	58.7	77	91	0.78	0.79	186	44	103	73	5.63	8	22	12			21.4829	3.42			125	76	5.5	13330	1	1	1	81	21.9852	90	0.57	0.8	183	39	120	60	10	22	13	4.4	5.6		6.31	91	50
1	59			2	1	69	94	91	1.24	0.88	211	51	110	141	0.28	18	27	31			25.9065	1.68			135	76	5.5	15302	1	1	1	92	24.426	89	1.09	0.93	211	51	130	103	12	21	19	4.9	5.4		2.51	124	72
2	60		2	1	1	61.3	92	130	0.95	0.77	215	52	124	87	0.25	13	20	25			24.8692	3.12			129	72	6.8	15077	1	1	1	90	25.3945	102	0.65	0.79	174	48	97	100	13	22	16	2.7	6.7			120	80
1	64			2	1	69.7	92	93	0.67	0.89	143	32	68	120	1.52	154	57	23			24.3462	2.19			123	68	6	24324	2	2	1	86	22.4964	96	1.05	1.05	129	36	68	59	41	42	31	4	5.6			125	70
2	56		2	1	2	55.2	82	227	0.57	0.9	207	27	139	86	0.57	9	16	11			21.8896	5.29			121	69	12.2	4474	1	1	1	88	23.2499	198	0.48	0.97	230	40	162	158	48	41	70	6.8	7.9		9.55	120	67
1	53			2	2	53.6	88	100	1.05	1.03	200	66	97	60	0.29	15	25	11		86.4286	18.8113	1.6			136	89	6	7935	3	3	2	80.5	19.6766	94	0.67	1.08	161	48	87	74	12	20	7	5.4	5.6		1.77	102	70
2	42			1	1	50.7	69	95	1.22	0.84	236	64	131	62	0.1	8	18	10			21.4895	2.23			125	86	5.4	13772	1	1	2	64.9	19.3546	85	0.86	0.91	192	47	104	128	10	17	8	4.3	4.9			118	72
2	46			1	1	52.9	72	98	0.49	0.7	176	28	107	106	11.31	17	24	33	1.21		21.9055	3.71			106	65	5.5	10230	1	1	1	78	22.765	85	0.56	0.79	197	31	124	174	13	14	9	4.3	5.4			108	71
2	57			1	2	66.4	82	94	0.99	0.9	201	38	123	110	0.23	10	18	15			25.7761	1.6			122	78	5.8	9340	1	1	2	89	26.8753	99	0.54	0.82	213	38	145	80	12	22	22	4.8	5.8		9.82	110	70
1	60			2	1	67.2	89	113	0.74	1.04	170	25	53	573	1.48	23	23	21			24.8335	2.33			121	70	5.8	4148	1	1	1	89	24.0341	116	0.79	1.05	131	26	59	242	18	22	17	4.1	5.6		3.33	100	60
1	41			3	2	74.9	88	97	1.39	1.05	189	36	108	178	0.53	25	19	18		68.8333	26.1626	1.74			128	78	5.8	2717	3	3	2	90	25.1776	110	0.97	1.1	187	31	101	265	27	18	22	5.8	5.7		4.09	107	70
2	51			1	1	55.5	74	81	0.87	0.81	226	50	136	126	0.74	22	25	20			23.4323	1.39			128	77	5.3	9598	1	1	2	82	23.4863	93	0.64	0.84	225	48	152	93	20	23	22	4.6	5		7.72	132	62
2	53			1	1	55.9	77	89	0.73	0.93	161	35	95	72	4.72	23	18	14			24.0681	1.73			120	67	5.7	12242	1	1	1	80.2	25.738	87	0.87	0.8	224	54	147	60	21	25	20	5.1	5.8			120	71
2	50			1	1	59.1	73	87	0.96	0.98	176	47	95	89	1.17	11	20	16		18	24.8553	1.33			130	79	4.9	14816	1	3	1	84.5	24.6269	86	0.5	0.8	163	48	92	61	11	22	16	2.7	5.2			139	72
2	57			1	2	59.9	76	91	0.89	0.89	243	57	147	98	1.18	11	29	22			25.5884	1.37			123	68	6	16235	1	1	2	82.5	25.8334	92	0.67	0.88	214	47	136	164	15	23	17	4.6	5.8			110	69
2	41			1	2	51.8	74	107	1.23	0.83	186	56	92	92	0.21	8	17	14	0.21		20.3105	2.39			132	78	5.5	11481	1	3	2	76	19.9826	93	1.03	0.8	209	62	121	81	10	20	17	4.9	6		1.6	99	71
1	61			3	2	69.1	84	92	0.79	1.03	195	39	114	118	0.28	48	23	20			23.7979	10.2			123	71	5.5	8077	3	1	2	92	24.0011	97	0.77	1.02	207	37	132	158	38	29	26	5	5.3		4.52	129	70
2	49			1	1	54.2	71	82	1.1	0.76	222	37	148	144	1.65	14	20	14			21.9328	1.19			130	81	5.2	7749	1	1	1	75	19.7361	96	0.53	0.82	212	45	133	181	11	17	16	2.7	5		7.45	120	72
1	51			3	1	66.7	88	100	1.3	1.1	169	52	82	85	0.14	40	20	28		37.7143	24.0601	1.77			128	85	5.3	6601	3	3	2	88	24.5453	98	0.45	1.06	171	47	96	72	43	29	34	5.8	5.4		4.19	110	80
2	69			1	2	50.5	72	85	1.51	0.7	161	62	70	53	0.2	14	27	19			20.8312	1.44			117	67	4.9	26436	1	1	2	71	20.3122	87	0.69	0.78	150	43	78	69	13	24	14	3.6	5			110	70
2	52			3	1	49.8	71	103	0.55	0.8	207	40	125	118	5.26	30	15	18			19.5753	3.2			129	88	5.9	4038	3	1	1	72.6	19.8111	112	0.32	0.84	190	40	118	144	23	20	20	6.3	6.2			128	80
1	48			3	2	60.8	86	127	1.31	1.06	185	29	106	198	0.67	65	35	41			22.6885	3.88			139	86	7.1	2810	3	1	2	83.5	21.7656	79	0.69	0.92	154	33	79	235	11	23	20	6.1	6.8		1.94	130	66
2	57		2	1	2	53.6	84	109	0.94	0.8	103	37	37	98	0.47	24	24	25			24.0139	3.57			134	86	6.7	3427	1	1	2	90	24.1409	93	0.39	0.8	224	49	139	142	14	16	12	5.3	6.2		11.96	128	87
2	56			1	2	55.9	88	97	1.31	0.78	203	45	118	115	1.05	24	31	31	0.89	43.5714	26.0813	2.75			131	71	5.2	10620	1	3	2	74	23.8502	85	0.87	0.75	225	55	147	110	22	25	24	3.7	5.6			129	78
2	48			1	1	49.1	73	97	0.82	0.79	205	62	108	56	0.06	11	19	12			20.3058	2.52			120	70	5.5	14958	1	1	1	79	19.9237	88	1.1	0.87	251	54	160	113	41	22	28	4	5.3			100	70
2	44			1	2	57.7	72	86	1.22	0.88	226	75	115	49	0.13	12	22	18		64.6667	21.1425	1.29			126	78	5	21570	1	3	2	73	21.7975	85	0.71	1.02	174	42	99	127	13	26	30	5.8	5.3			110	78
1	49			3	2	67.1	82	84	1.34	1.09	179	51	96	55	0.94	24	26	18		107.619	22.3938	0.71			115	69	5.3	3428	3	2	2	77.5	20.2647	80	0.96	0.95	207	60	118	78	17	21	25	4.7	5.9			120	80
2	52			1	1	50.7	81	91	0.99	0.88	183	31	108	150	0.97	35	18	12			23.0529	2.01			120	76	5.7	7360	1	1	2	80	22.0683	98	0.69	1.05	163	34	95	143	46	22	18	6.2	5.4		4.64	128	70
1	55			3	2	67.8	86	104	1.03	1.03	164	35	91	86	3.83	15	20	21			24.1946	1.89			119	76	5.3	3931	3	1	1	91	24.4509	86	0.77	0.86	187	30	113	280	29	20	20	4.2	5.2		3.26	119	79
2	63			1	2	49.1	85	90	1.01	0.78	215	46	117	193	0.46	11	21	16			21.8513	2.31			139	79	5.5	14096	1	1	2	83	21.1111	140	0.9	1.13	100	26	55	61	13	27	38	4.4	5.4		7.61	120	70
2	48			1	1	48.5	74	86	0.71	0.73	158	33	90	82	1.76	7	13	8			20.6915	2.27			105	63	5.3	6317	1	3	2	86	23.533	109	0.7	1.02	174	40	93	161	41	25	21					129	80
1	44			2	1	61.6	71	91	1.55	1.06	206	41	120	143	0.72	22	23	18		95	20.7496	2.3			124	82	4.6	6779	1	3	2	77.5	21.3985	90	1.17	1.08	199	37	137	73	14	18	17	5	4.6		1.52	110	74
2	40			1	1	46.9	67	87	0.8	0.76	172	36	102	89	0.78	11	20	18			18.8109	2.11			105	59	5.4	12618	1	1	2	72	18.8498	83	1.49	0.9	182	40	116	70	11	18	13	5	5		5.46	99	68
1	51			1	2	63.9	83	96	1.11	0.89	201	54	110	70	0.94	17	17	25			23.8162	2.21			128	72	5.8	13454	1	1	2	87.5	24.0908	109	0.98	1.01	245	61	167	79	18	18	20	6	5.8			126	82
2	49			1	1	55.8	65	90	0.67	0.79	189	59	95	75	0.34	5	20	12			23.1064	1.86			118	69	5.4	13407	1	3	1	67.2	21.6299	101	0.58	0.78	189	60	112	96	11	19	14	2.7	5.8			128	70
2	56			1	2	61.5	82	97	0.71	0.76	233	51	137	124	0.76	21	23	20			24.8869	2.45			127	73	5.2		1	1	1	89	25.7039	93	0.45	0.82	228	39	143	192	137	27	38	3.7	5.2		8.52	120	80
2	52			1	2	58.4	77	88	0.75	0.76	246	54	154	89	1.04	18	24	19			24.1209	1.02			139	77	5.2		1	3	2	74	23.9038	87	0.59	0.85	208	57	117	72	15	25	20	4.4	5.1		4.7	91	60
2	70		2	1	2	47.9	76	104	0.96	0.76	246	44	156	143	0.95	17	19	13			22.5331	0.88			134	69	6.1		1	1	2	84	22.9095	101	0.54	0.8	215	30	135	277	18	20	15	4.3	6.1			112	68
2	52			1	2	44.1	70	88	1.25	0.82	203	41	127	70	0.45	15	23	15	0.32		16.8246	0.85			123	75	5.7		1	1	1	67.5	16.5709	93	1.24	0.83	207	43	142	80	16	24	16	4.2	6			120	80
2	62			1	2	67.5	88	85	1.03	0.83	162	35	94	91	0.76	14	23	18			27.6657	1.83			125	79	5.1		1	1	2	93	27.1384	85	0.91	0.86	183	37	116	115	15	21	17	4.1	5.4			112	72
2	63			1	1	51.6	77	91	1.2	0.93	204	52	109	104	1.88	23	27	13	8.27		21.4776	1.15			134	71	5.8		1	1	2	77	21.2949	94	0.84	0.91	206	51	123	114	23	28	16	3.8	6.2			118	70
2	68			1	2	67.6	95	98	1.7	0.96	209	46	123	103	1.13	14	20	14			29.4525	2.35			133	78	5.2		1	1	2	98	30.0659	102	0.84	0.94	192	38	129	110	16	23	19	6.9	5.7			132	79
2	42			1	1	51.4	63	87	0.68	0.71	137	47	66	29	0.07	12	19	15			20.255	1.79			108	64	5.1		1	1	1	68	19.2327	74	0.64	0.75	139	36	75	56	12	19	17	3.5	5.9			110	70
2	50			1	2	59.5	74	93	0.77	0.79	196	45	108	137	0.62	15	17	10			24.3556	4.24			117	67	5.8		1	1	1	79	24.5001	109	0.48	0.88	210	39	133	190	34	21	27	4.2	6.7			102	70
2	55			1	1	57.7	81	110	0.74	0.74	206	42	130	92	3.59	52	20	23	0.56		26.7018	2.13			132	85	5.8		1	1	1	90.9	27.8754	116	0.53	0.74	222	45	149	167	178	26	36	4.5	6.2			110	70
2	45			1	1	63.8	77	104	0.86	0.83	153	40	82	91	0.75	17	17	16		50	25.7848	3.43			130	77	5.6		1	3	1	84	24.779	99	0.65	0.88	160	33	93	126	15	17	12	4.2	5.7		9.75	110	70
1	70			3	1	77.6	98	99	0.76	1.04	174	35	73	318	0.63	226	52	39		125	29.8259	1.66			117	76	5.5		2	3	2	99	30.9406	92	0.57	1.25	197	38	107	269	78	28	24	3.8	5.8		6.01	108	62
2	57			1	2	61.6	90	98	1.04	0.8	237	45	135	199	1.3	10	18	14	0.69		26.5223	1.5			135	79	5.4		1	1	2	88.5	25.4934	90	0.88	0.93	261	56	186	113	12	20	15	6.4	5.1			120	70
1	57			3	1	69.3	89	115	0.65	1.3	197	28	115	225	0.39	32	37	57			27.3774	2.48			125	82	6.1		3	1	1	92.3	27.3861	114	0.4	1.28	181	26	115	161	28	23	30	6.5	6.7			108	68
2	53			1	1	70.7	86	90	1.08	0.83	278	36	191	189	0.38	21	29	37			27.4796	2.66			123	75	5.5		1	1	2	92.8	25.764	97	0.63	0.94	204	36	145	140	12	19	17	3.9	5.5			118	80
1	60			1	1	63.8	90	93	1.13	1.11	191	30	106	207	0.14	12	19	21			26.4191	2.1			125	81	5.5		1	3	1	88.6	26.3376	89	0.67	1.05	198	41	122	144	16	19	21	5.5	5.6			125	83
1	67			1	1	54.6	77	116	0.72	0.97	157	40	78	113	0.18	12	18	11	0.45		21.2749	1.21			133	68	6.7		1	1	1	83.5	21.3548	99	0.92	0.99	164	43	91	110	17	24	16	4.3	6.3		3.4	132	80
1	63			3	2	61.5	85	112	1.03	0.89	207	50	114	110	0.38	45	16	12		150	22.9778	2.34			126	78	5.5		3	3	2	82	22.4148	109	0.68	0.95	167	48	98	60	25	17	11	4.9	4.9		1.54	128	72
2	59			1	1	45.5	77	89	0.8	0.71	221	35	139	186	1.12	19	17	18			21.3163	2.12			112	68	5.7		1	1	1	75.5	20.09	86	0.65	0.77	227	34	150	232	15	18	16	4.2	5.6			100	70
1	61			3	2	69.8	86	95	0.91	0.99	238	34	160	154	3.18	33	21	18		125	24.9083	2.03			135	81	5.5		2	3	1	93.5	26.0904	87	0.84	1.05	192	31	121	248	44	30	32	6.4	5.6			122	90
2	47			1	1	51.5	73	99	0.67	0.7	225	58	129	78	0.3	11	16	13			24.4609	2.45			139	89	5.4		1	3	1	85	27.7566	93	0.59	0.8	216	64	132	73	16	21	19	3.5	5.6			110	80
1	44			3	1	50.5	70	103	1.29	1.01	154	33	89	82	0.18	13	17	13		130	18.4372	1.3			129	75	5.8		3	3	1	80	21.1938	101	1.38	1.05	209	36	142	65	19	28	25	7.1	5.7			120	80
1	44			1	1	74.3	87	88	0.94	1.21	198	33	123	149	6.92	25	19	18			25.4393	2.3			134	87	5		1	1	2	93	26.1761	80	0.84	1.14	213	30	150	166	24	20	22	6.3	4.6			126	86
2	42			1	2	60.5	77	98	1.19	0.73	225	66	120	96	0.04	9	19	14			22.412	1.52			115	65	5.4		1	1	2	84.5	24.4699	107	0.59	0.86	225	48	141	164	9	19	16	2.9	6.3			118	60
2	47			1	1	53.9	74	101	1.44	0.85	140	47	64	76	0.15	4	20	10			21.7284	1.69			107	63	5.3		1	1	2	80	21.5293	94	1.12	0.88	162	44	92	86	7	22	12	4.3	5			100	60
2	63	3		1	1	59.9	87	87	0.73	1.15	261	36	174	177	0.31	18	14	9			28.1395	2.32			134	79	5.6		1	1	1	102	28.8231	78	0.46	1.28	206	36	145	81	16	18	16	6.3	5.6			150	90
2	43			1	2	56.5	74	92	0.89	0.78	195	45	108	147	0.31	10	15	8	0.84		25.1782	1.78			124	69	5.5		1	3	2	75.3	22.6093	91	0.6	0.87	234	43	155	153	14	22	20	4.9	5.3			110	70
2	44			1	2	60.7	85	91	1.01	0.71	157	35	80	198	1.06	7	16	13		41.6667	23.9498	1.9			120	73	5.3		1	3	1	78.9	22.2862	90	1.04	0.81	188	38	112	164	13	19	20	4.7	5.2			93	70
2	45			1	1	49	74	79	1.33	0.79	209	70	103	97	1.28	16	26	18			21.1527	0.82			105	61	5.2		1	1	1	67	20.213	78	1.04	0.8	158	53	77	118	14	20	12	3.5	5.1			90	50
2	54			1	2	57.2	90	81	1.11	0.76	170	45	96	48	0.89	11	22	17			20.9847	1.59			120	76	5.3		1	1	2	75	20.7028	86	0.48	0.89	168	46	97	61	20	22	21	4.8	5.5			108	66
2	70			1	1	66.7	95	100	0.84	0.81	230	62	134	106	4.29	29	38	32			29.2531	3.06			138	79	7.2		1	1	2	93.6	27.2762	104	0.98	0.89	249	68	164	92	24	24	23	5	7.1			154	88
1	69			2	1	58	87	90	0.67	0.91	160	47	82	78	0.26	23	22	14		188.095	21.3816	1.4			138	80	5.4		1	3	1	78	20.4829	91	0.94	0.79	173	53	96	60	24	27	16	5.3	5.3			101	60
2	56			1	1	52.4	80	81	1.15	0.79	259	44	177	75	0.33	12	19	19	0.97		22.1523	1.41			121	80	5.2		1	1	2	81.5	22.1694	85	0.95	0.71	217	34	145	154	15	22	27	3.8	5.8			110	60
2	45			1	1	62.8	78	89	0.92	0.79	204	53	115	100	0.24	16	17	17			25.5427	1.83			123	82	5.4		1	1	2	79	25.6488	96	0.67	0.83	218	43	147	141	13	18	16	3.7	5.2			110	72
2	53			1	2	65.4	87	112	0.55	0.92	190	40	120	55	3.38	12	18	8			28.0846	3.48			133	85	5.5		1	1	1	93.2	28.7174	92	0.43	0.93	176	38	103	141	13	16	9	3.4	5.9			128	88
2	43			1	1	60	82	86	0.73	0.8	184	43	104	112	0.29	11	21	15	0.6		27.0621	2.25			120	78	5.1		1	1	1	84	25.8339	86	0.7	0.82	198	53	121	76	14	22	17	5.2	5.3			117	76
2	66			1	1	51.9	75	81	0.53	0.73	182	42	109	108	0.35	12	16	15			22.642	0.94			130	72	5.5		1	1	1	82.5	22.9194	93	0.61	0.72	194	32	136	123	14	25	29	3.7	5.5			117	70
2	41			1	2	60.7	81	84	0.95	0.85	177	48	102	56	0.32	12	20	13		36.6667	21.6869	1.85			122	77	4.8		1	3	1	77.7	20.9294	84	0.68	1.17	183	35	129	82	21	24	21	5.1	4.8			100	70
2	55			1	2	50.7	65	93	1.17	0.81	195	62	97	98	0.06	46	26	23	0.61	6.66667	19.5352	1.35			121	80	5.3		1	1	2	77	19.2693	93	0.93	0.86	182	52	100	100	25	21	17	5	5.1		2.16	102	70
2	55			1	1	52.6	67	93	0.92	0.91	168	37	94	145	1.87	12	21	14			21.9221	1.85			138	77	5.5		1	1	2	70.5	22.3772	92	0.8	0.93	182	36	122	81	12	21	15	4.1	5.4		6.57	90	60
2	50			1	1	55.8	73	83	0.88	0.86	188	46	106	100	0.3	8	21	16			20.5706	1.17			134	89	4.9		1	1	2	78	19.6988	79	0.37	0.94	207	47	128	81	12	21	18	3.5	5.7			106	60
2	47			1	1	53.7	79	82	0.55	0.72	194	48	102	155	0.8	75	47	48			23.4893	1.69			122	70	4.7		1	1	1	77	23.029	83	0.63	0.71	234	56	150	104	143	26	42	4.6	5.2			110	72
1	46			3	1	63.4	77	84	0.93	1.17	165	32	95	141	0.38	17	16	10			23.203	1.22			122	80	5.3		3	3	1	77.5	22.5808	84	0.77	1.24	177	41	106	95	18	19	13	4.3	5.4			128	90
2	48			1	1	72.5	89	106	0.95	0.77	121	31	58	124	0.39	15	28	31			27.4556	3.32			128	74	6		1	1	1	88.5	28.5917	108	1.18	0.81	126	26	79	72	10	18	15	4.7	6.3		11.97	101	60
2	55		2	1	2	61	90	87	0.34	0.81	160	49	73	153	0.42	23	20	26			25.6544	3			120	76	5.9		1	1	2	91	25.7471	102	0.36	0.88	188	40	114	161	25	20	26	5.4	7		19.66	110	70
2	57			1	2	54.5	77	111	1.45	0.69	240	50	152	93	0.62	17	20	18			22.6555	2.32			129	76	5.9		1	1	2	78	22.1305	113	1.47	0.72	177	45	99	121	25	26	35	5.3	6.2		7.24	110	70
2	55			1	1	58.7	87	86	1.08	0.93	272	42	169	229	0.69	16	23	12			25.5748	2.38			112	68	5		1	1	1	87	24.9319	90	0.63	1.01	264	46	180	135	19	24	21	5.1	5			102	66
2	52			1	2	66.5	88	83	0.82	0.9	237	43	146	155	1.47	14	19	13			25.0907	2.29			126	74	5.3		1	1	2	88.5	23.3998	88	0.56	0.9	204	43	131	111	12	17	11	4.6	5.8			124	74
1	53			1	2	69.4	94	86	1.12	1.13	207	33	122	196	0.36	26	22	26			24.8546	1.21			115	65	5.3		1	1	2	88.2	23.6369	86	0.91	1.08	187	36	121	127	25	22	25	5.8	5.9			100	70
2	55			1	1	56	80	85	0.61	0.81	151	40	83	53	10.99	31	31	25			23.279	1.3			113	70	5.3		1	1	1	80	23.1911	80	0.62	0.78	152	35	98	63	12	22	14	3.3	5.7			96	64
1	55			1	1	76	94	91	0.74	1.13	164	40	79	183	0.56	76	20	27	0.14	24	25.8697	1.46			122	71	5.5		1	3	1	86.5	23.8452	90	0.6	0.97	153	37	84	93	58	30	37	5.8	5.4			93	68
2	53			1	1	58.7	85	94	1.18	0.78	284	37	210	85	0.37	39	23	22			26.4403	2.35			125	80	6.2		1	1	1	86.5	25.2582	102	0.63	0.83	374	34	315	158	43	35	38	5.7	5.9			116	76
1	59			1	2	69.8	88	96	0.89	1.06	193	40	106	213	0.19	17	21	15		29.1667	25.5143	0.93			134	70	5.4		1	3	2	87	25.1426	97	0.74	1.07	200	42	132	131	14	23	14	6.8	5.3			120	80
2	46			1	2	58.7	79	97	0.56	0.9	152	31	51	412	0.44	31	30	29			24.7834	2.61			130	76	5.5		1	1	2	81.6	25.3939	95	0.8	0.86	164	33	101	172	32	21	17	5.5	5.9			109	74
2	54			1	1	46.1	119	91	0.69	0.78	191	51	112	52	0.74	11	17	8	1.69		18.235	1.02			123	72	5.6		1	1	2	72.2	17.7999	90	0.94	0.79	205	42	135	106	14	21	10	3.9	5.2			100	60
2	40			1	1	57.6	78	84	0.7	0.82	212	47	125	88	0.35	9	17	13	0.3	8.33333	23.3681	1.71			119	72	5.1		1	2	2	85	24.3012	75	0.71	0.92	185	41	112	80	13	21	20	5.4	5.3			110	70
2	49			1	1	55.4	78	88	0.86	0.74	224	50	136	124	0.64	13	22	26			24.4264	2.24			130	78	5.6		1	1	1	79	23.8158	96	0.78	0.76	191	44	115	147	15	27	31	3.6	6			118	78
1	57			2	1	61.9	83	106	1.19	0.95	229	46	138	133	3.21	24	22	12		105.5	22.654	1.39			139	77	5.6		1	3	2	87	22.828	106	1.29	1.01	207	43	131	140	53	23	14	6.9	5.6			128	90
2	61			1	1	51.4	77	95	0.65	0.65	176	39	86	180	0.58	5	23	15			23.5934	2.12			137	83	5.4		1	1	1	77	21.6655	101	0.92	0.77	198	46	124	80	11	28	19	4.4	5.2			102	69
2	50			1	1	46.7	73	90	0.57	0.71	206	33	136	74	0.3	8	22	16			20.4545	1.68			134	77	5.7		1	1	1	74	16.8179	81	0.54	0.86	231	46	153	111	14	16	13	3.3	5.5			97	62
2	46			1	1	48.1	67	90	0.96	0.78	151	45	72	81	0.13	5	14	7	0.62	16.6667	20.2554	1.55			126	82	5.1		1	3	1	65.5	19.8694	95	1.34	0.78	153	56	73	98	10	16	9	4.2	5.2			100	70
2	46			1	1	50.7	74	96	0.62	0.72	216	71	103	112	0.22	26	31	45		67.5	21.7151	2.44			128	72	5.3		1	1	1	73	21.1279	86	0.55	0.85	181	57	102	73	14	18	12	3.3	5.7			120	80
2	46			1	1	47.6	66	129	0.62	0.71	185	50	93	124	0.76	7	21	16			20.9873	1.81			131	80	6.2		1	1	1	67	21.0314	140	0.61	0.83	183	43	111	77	11	14	9					112	60
2	54			1	2	63.5	90	96	0.54	0.84	173	52	77	177	0.66	19	41	67			26.5677	4.42			136	89	5.7		1	1	2	85	24.9199	105	0.59	0.93	203	44	123	164	13	32	33	5.9	5.5			150	80
2	49			1	1	52.4	67	91	1.15	0.73	229	67	117	89	0.38	6	27	14	0.02		20.9902	2.12			128	82	5		1	1	2	72.5	20.6138	89	1.15	0.71	238	72	146	74	13	27	18	4.4	4.7		2.87	120	80
2	44			1	1	64.8	87	95	0.49	0.76	141	26	87	80	0.25	4	20	14		5	27.1468	1.66			118	67	5.4		1	1	1	86	26.7132	93	0.67	0.75	132	25	89	64	14	18	14	3.8	5.6			100	70
2	41			1	1	56.3	74	99	0.52	0.66	167	43	89	90	0.55	17	23	22	0.27	73.3333	23.7084	2.3			118	73	5.4		1	3	1	85	26.3063	93	0.63	0.67	157	36	89	130	29	14	14	3.7	5.4			102	62
2	65			1	2	45.2	74	89	0.62	0.73	219	43	127	179	0.43	9	20	15			21.4686	1.55			133	85	5.6		1	3	1	82.5	21.5693	87	0.82	0.75	276	44	200	117	16	29	25	4	5.3		3.67	148	90
2	52			1	1	59.9	83	94	0.89	0.86	205	38	136	91	1.81	16	17	17	0.71		24.7087	2.33			128	77	5.2		1	1	2	87	24.275	95	0.64	0.78	217	35	151	109	18	20	21	3.4	5.3		10.15	102	71
2	54			1	1	62.8	75	91	0.78	0.77	177	45	92	133	0.45	8	24	20			23.264	2.25			130	72	5.3		1	1	2	76.4	21.9816	90	0.58	0.83	144	30	81	128	10	25	18	3.3	5.5		5.19	110	70
1	69			1	2	71.7	95	99	0.55	1.12	139	29	75	119	1.18	17	25	24			27.0527	2.35			129	77	6.6		1	1	1	84	22.4974	106	0.64	1.14	134	49	61	79	12	30	25	4.9	6.6			115	70
2	50			1	1	40.3	66	88	0.92	0.74	179	52	98	68	0.17	14	19	14			16.0011	1.49			116	71	5.3		1	1	2	74.5	15.6246	91	0.83	0.76	180	38	105	137	23	22	18	3.7	5.1		2.83	110	72
2	48			1	2	62.2	83	82	0.49	0.68	131	32	71	72	0.71	13	27	28			23.996	1.31			121	75	5.2		1	1	2	90.5	23.554	90	0.8	0.72	197	40	132	122	13	18	10	5.1	5.1		13.75	110	80
1	50			2	1	68.3	86	89	0.96	1.02	160	35	97	76	0.52	25	18	17		114.476	24.6077	1.75			137	89	5.3		1	3	1	97	23.4375	88	0.89	1.02	150	32	97	82	18	16	13	6.3	4.8		3.02	112	78
1	66			1	2	71	92	90	0.59	0.93	182	33	97	232	3.14	32	20	18		71.4286	23.8053	1.62			136	80	5.9		1	3	2	91	22.2552	91	0.95	1.36	206	36	143	98	17	21	14	6.3	5.8		1.21	130	80
2	41			1	1	52.2	69	88	1.03	0.67	196	51	115	91	0.59	6	17	13			22.0965	1.84			123	73	4.9		1	1	1	71	22.2658	85	0.52	0.72	178	40	107	140	13	18	15	3.2	5.3			102	80
2	43			1	1	55.2	79	95	1.32	0.65	207	35	135	122	2.18	13	18	18			23.892	2			124	78	5.1		1	3	1	81.5	22.9487	88	1.28	0.84	182	34	109	136	12	15	14	4.1	5.4			98	60
1	59			3	1	53.3	75	85	1.01	1.14	178	40	98	154	0.26	14	17	13	0.44		18.9975	1.13			132	83	5.5		2	1	1	77	19.6357	87	0.8	1.21	177	49	101	110	15	21	14	7.1	6			120	80
2	40			1	2	53	79	85	1.34	0.69	164	43	94	69	0.16	7	23	23	0.91		20.071	1.18			105	72	4.8		1	1	2	76	20.1598	90	0.74	0.82	167	38	95	110	11	16	12					100	60
1	51			3	1	58.5	76	85	1.01	0.91	151	44	84	46	1.52	15	21	16	0.73		21.4876	1.57			119	79	5.1		3	1	1	80.2	20.9532	94	0.33	0.91	137	34	81	44	13	18	12	4.4	5.4			120	72
1	50			1	2	78.2	99	85	1.29	0.97	183	51	94	119	0.61	19	30	39	0.25	196.905	26.5257	1.46			127	80	4.5		1	3	2	93	26.2032	90	1.87	0.96	174	36	109	104	19	23	20	4.6	5.3			120	80
1	47			1	2	65.4	82	99	0.81	1.11	186	34	113	106	1.4	154	27	20			23.6479	2.52			116	66	4.9		1	3	2	81.6	23.4986	128	1.26	1.21	200	29	141	141	184	20	14	5.9	5.2			110	70
2	60	3		1	1	66.6	88	100	1.03	1	161	56	69	83	25.97	13	31	20			27.1229	1.89			124	70	5.4		1	1	1	83.2	25.331	91	1.12	0.88	258	45	170	204	14	27	24	4.6	5.8			138	90
2	59			1	1	57	83	96	1.01	0.75	214	37	126	212	0.95	20	30	35			25.8477	3.31			135	78	4.9		1	3	1	84	25.326	108	0.69	0.79	186	32	114	150	22	39	34	6.1	5.2			104	70
1	49			1	2	69.9	88	104	1.58	1.32	204	41	127	95	1.84	14	27	33			23.5454	1.77			112	72	5.2		1	1	2	82	23.6002	104	0.94	1.33	175	35	112	74	11	34	31	5.7	5.5			92	60
2	46			1	1	55.4	72	124	0.61	0.8	153	42	79	67	12.12	18	18	20	1.23		21.2142	3.37			122	76	4.9		1	1	1	75.5	22.6176	98	0.71	0.85	151	35	88	137	14	15	12	4	5.4			112	71
2	60			1	2	51	74	96	0.79	0.89	216	39	137	177	0.38	22	32	37		53.5714	20.7698	2.54			128	75	5.8		1	3	1	76.5	21.2041	104	0.55	1.08	185	37	106	185	34	46	62	4.6	6.1			136	80
1	52			1	2	63.1	79	85	1.11	0.93	187	42	119	60	0.49	19	26	22	0.18		23.5181	1.13			136	89	4.7		1	1	2	79	22.801	93	0.79	0.99	175	34	122	64	23	24	21	5.3	5.4			124	80
1	69			1	1	48	70	90	0.85	0.73	161	50	83	72	2.11	13	19	15		11.3333	18.2673	1.44			133	73	4.6		1	2	1	71	17.2611	86	1.16	0.92	163	49	81	60	12	17	16	4.8	4.8			116	60
2	52		2	1	1	58	83	93	0.75	0.72	198	45	118	137	1.02	13	29	46			24.8417	2.35			126	80	5.7		1	1	1	85	24.5419	100	0.75	0.81	223	42	143	131	16	34	39	4.9	6.5			120	80
2	49			1	2	65.4	87	106	0.9	0.64	189	49	113	69	0.24	12	24	20	0.64		24.8892	3.44			117	71	5.5		1	3	2	81.8	23.7211	103	0.65	0.78	181	34	122	85	12	23	16	2.7	5.6			92	70
1	50			2	1	75.7	90	83	1.08	1.1	215	46	140	64	0.23	10	23	25	0.43		23.5207	1.75			133	85	5.4		1	1	2	81	22.1344	84	1.38	1.01	190	37	130	81	13	25	24	6.6	5.4			104	80
2	64			3	1	48.3	88	97	0.54	0.6	182	48	82	192	1.28	38	22	19			21.6684	1.65			136	83	5.3		3	1	1	89	21.1868	93	0.67	0.7	225	44	134	216	17	21	15	3.9	5.8			120	70
1	41			3	1	73	83	90	1.06	1.01	144	38	82	56	0.29	23	21	17		56.3333	24.2507	2.1			136	89	4.9		3	3	1	86	24.0729	92	1.24	1.05	151	34	91	60	18	17	11	7.3	5.5			120	80
2	68			1	1	54.1	91	92	1.24	0.74	199	48	114	123	0.23	12	19	11	0.87		24.3683	2.08			128	81	5.4		1	1	1	88	21.4037	92	1.24	0.78	210	42	138	96	11	20	13	4.5	5.5			132	82
1	48			3	2	72.5	85	89	0.97	0.94	239	42	147	163	0.48	29	25	29			26.3736	2.03			115	66	4.8		3	1	2	97	27.1011	85	0.6	0.88	227	39	141	223	36	23	28	5.2	5.5			100	60
2	58			1	1	49.7	79	82	1.05	0.78	228	41	147	160	0.81	13	21	12			22.3864	1.05			104	62	5.2		1	3	2	81	22.5672	84	0.64	0.81	247	45	177	99	13	20	13	4.9	5.7			100	60
2	47			1	1	60.1	76	77	1.07	0.78	179	47	94	118	0.41	6	20	15			25.1778	1.57			100	64	4.7		1	1	1	74	24.5392	83	0.69	0.9	174	43	106	124	12	15	11	3.9	5.6			100	70
2	47			1	2	52.7	74	84	0.68	0.74	195	63	100	93	0.14	9	18	13			23.6424	2.2			133	75	4.9		1	1	1	78.3	23.8987	80	0.66	0.77	172	60	91	88	9	17	14	4.1	5.3			110	80
2	53			1	1	46	74	93	1.03	0.72	228	57	140	98	0.23	13	25	25			21.3164	1.35			118	63	4.9		1	1	1	82.5	21.9487	96	0.94	0.78	213	50	136	174	15	24	22	4.5	5.7			110	70
2	60			1	1	57.6	77	101	0.97	0.71	186	49	108	99	0.39	53	26	35	0.27		22.4719	1.35			137	83	5		1	1	2	88	22.1875	97	0.96	0.81	193	43	121	84	49	40	45	4.8	5.6			110	70
2	53			1	1	49.4	74	102	0.92	0.75	142	65	58	42	0.41	9	20	20			20.5885	1.88			112	77	5.2		1	1	2	76.5	21.0071	101	0.68	0.75	164	58	76	54	10	28	18	3.2	6			106	68
2	64			1	1	54.1	80	86	0.47	0.78	172	45	90	123	0.42	9	19	11			24.2055	1.81			107	62	5.2		1	1	2	84.5	28.0981	92	0.43	0.79	183	45	106	80	12	21	14	5.9	5.8			130	80
2	48			1	1	63.2	82	84	0.53	0.89	178	32	107	154	0.36	20	15	10			22.7702	1.75			119	78	5.4		1	1	1	86	22.7516	86	0.63	1	213	30	129	270	21	12	10	4.3	6.1			110	70
2	44			1	1	57.1	76	124	0.64	0.77	175	38	107	91	0.51	19	13	10			21.9466	4.63			120	71	5.6		1	1	1	75	20.5629	119	1.29	0.79	200	40	144	67	15	15	10	4.5	6.3			100	60
2	46			1	2	65.4	82	90	0.99	0.79	166	49	96	52	0.21	17	18	16			25.5788	1.86			117	71	5.1		1	1	2	89	24.4837	86	0.88	0.73	154	46	91	69	23	23	19	3	5.4			118	78
1	49			3	1	68.8	88	85	0.98	0.9	220	53	136	52	0.76	22	23	20		71.4286	21.6657	0.8			112	77	4.9		2	3	1	92	22.9769	84	0.8	0.96	236	36	162	99	28	22	29	4.6	4.9			118	88
2	46			1	1	54.6	77	89	0.82	0.79	236	40	152	151	3.13	23	18	22		7.33333	23.4776	1.19			124	73	5		1	2	2	80	24.1542	85	1.2	0.8	232	38	153	206	25	20	20	5.7	5.8			98	60
1	51			2	2	69.5	86	93	1.29	1.13	248	60	149	107	0.45	139	30	29			23.4924	1.67			126	78	5.2		1	3	2	84.5	23.1544	97	1.41	1.11	281	52	191	131	206	28	30	9	5.8		2.56	109	70
2	45			1	2	56.7	83	111	2.9	0.65	175	50	99	85	2.09	20	19	15			24.6709	2.99			131	77	4.7		1	1	1	83	24.4307	108	1.86	0.66	153	35	84	153	25	28	23	5.8	4.9		5.79	110	70
2	58			1	2	58.7	81	88	1.03	0.93	293	57	196	113	0.44	19	18	17	0.45		23.9362	1.22			118	76	5.3		1	1	2	82	23.5562	81	0.75	0.85	258	45	185	110	16	26	28	4.8	5.8			109	70
2	43			1	1	58.8	70	89	0.83	0.73	186	56	102	60	0.38	7	15	13			21.6502	1.23			120	67	5.5		1	1	1	71	22.2737	101	0.89	0.76	196	46	117	69	10	16	10	3.7	4.9			100	70
1	44			1	1	66.5	80	88	0.86	1.02	163	41	96	59	1.7	8	16	14			22.5307	1.05			138	85	4.9		1	1	1	89	23.249	102	1.08	0.92	165	33	109	74	14	19	22	5.7	5.8			110	70
2	51			1	1	58.7	80	88	0.89	0.84	219	40	140	121	0.91	13	20	16	0.24		26.7988	1.54			127	83	4.8		1	1	1	83.2	25.6663	90	0.79	0.95	247	35	123	410	13	21	27	4.1	5.4			122	82
2	44			1	2	47.8	68	87	0.51	0.78	135	50	61	47	0.25	11	35	38		19.6667	21.2444	1.46			117	68	4.9		1	3	2	69	21.3743	94	0.73	0.83	147	46	69	51	12	22	15	4.1	4.8			101	70
1	57			1	2	68.9	87	87	1.16	1.05	170	50	100	40	0.25	19	17	12			25.2158	1.1			120	75	4.4		1	1	1	86.4	24.8499	82	0.66	1.05	164	52	97	44	16	18	19	4.5	4.8			122	84
2	55			1	2	54.8	84	106	0.58	1	207	38	140	62	0.2	19	18	21			23.5945	1.88			129	73	5.3		1	1	2	83	24.1949	96	0.6	0.94	184	29	132	87	10	17	14	3.9	5.8			109	60
2	58			1	1	63.9	93	86	0.7	0.93	211	30	142	143	3.21	18	22	25			26.2238	1.46			124	71	5		1	1	1	95	26.0385	87	0.74	0.89	209	32	146	124	12	24	20	4.1	5.5			134	88
1	57			3	1	84.3	99	106	0.97	1.03	164	39	95	97	0.35	61	23	23		164.667	27.8759	1.95			129	83	5		1	3	1	97.5	27.6457	103	0.82	1.12	142	29	92	87	42	26	28	4.8	5.3		3.1	106	62
2	53			1	2	52.2	76	96	0.8	0.76	219	63	122	75	3.25	19	28	27			22.0965	1.4			132	79	5.3		1	1	2	79.5	22.0417	90	0.73	0.82	183	42	115	81	14	39	29	5.2	5.6		3.91	124	80
1	49			3	1	67.2	85	102	0.94	0.94	179	46	86	213	1.24	124	37	47		172.667	24.328	2.28			133	80	5.2		3	3	1	88	24.9497	110	0.79	0.88	202	48	92	331	229	48	47	6.1	5.6			138	82
2	43			1	1	57.6	72	82	0.57	0.91	183	61	90	79	4.41	15	21	19			21.2084	1.27			112	61	4.7		1	3	1	71	20.8264	84	0.8	0.94	187	58	100	77	13	16	11	5.4	5.1			108	68
2	42			1	1	50.5	63	89	1.04	0.8	148	47	73	56	0.26	7	15	10	0.43		19.1714	1.08			113	68	4.5		1	1	2	69.5	19.6407	89	0.56	0.8	158	53	79	48	11	15	10	3.3	5.1			110	70
1	42			3	1	62.4	82	88	0.97	1.06	201	31	103	309	1.8	47	23	22			21.3399	1.37			135	77	5.1		3	1	1	79.5	20.9883	94	0.84	1.07	209	42	123	196	41	23	18	5.2	5.8			109	70
2	43			1	1	56.6	78	88	0.8	0.76	192	48	118	59	0.33	19	19	14			22.6154	1.62			123	86	5.3		1	1	1	79	20.3175	86	0.62	0.8	193	45	130	49	18	18	10	2.9	5.6			110	80
2	51			1	1	59.4	78	97	0.9	0.9	185	54	103	68	0.45	20	20	21		21.3333	23.4075	2.56			119	62	5.6		1	1	1	84.5	22.5583	94	0.91	0.96	207	47	132	79	16	21	24	4.2	6			98.5	70
2	52			1	1	55.4	78	110	0.99	0.8	209	58	116	119	1.36	20	27	17		84.1667	23.1788	2.08			124	71	5.6		1	3	1	89	22.4774	105	0.99	0.87	187	51	99	142	12	28	19	3.8	5.9		8.63	104	70
2	45			1	2	53.7	72	93	1	0.89	165	46	76	165	0.45	15	12	23			22.0096	2.35			122	77	5.1		1	1	2	75.4	21.4219	90	0.57	0.92	147	39	63	172	11	11	16	4.8	5.1		7.72	120	80
2	44			1	1	57.3	81	84	0.77	0.84	178	55	92	64	2.62	5	17	9	0.31		23.5454	2			113	71	5		1	1	2	82.5	23.6503	83	0.77	0.84	223	74	123	38	7	17	10	3.3	5.5			100	60
2	41			1	1	62.3	80	106	1.08	0.78	186	61	94	85	0.13	15	15	17			22.9111	2.31			127	75	5.4		1	1	1	81	23.7248	90	0.87	0.81	180	43	100	119	14	22	24	4.2	5.5			110	70
2	41			1	2	53.7	72	101	0.61	0.8	190	51	98	156	1.21	14	17	9			24.9185	2.65			129	72	5.3		1	1	1	78	26.5375	101	0.5	0.87	184	43	104	138	14	22	16					100	60
2	50			1	1	65.8	78	109	0.7	0.99	188	35	118	118	0.52	15	23	34			25.9621	2.99			110	68	6.3		1	1	1	89	25.1968	149	0.41	1.04	225	29	160	191	33	23	33	5	7.2			100	60
2	65			1	2	56.5	81	108	0.86	0.91	187	42	113	134	1.61	14	21	14			24.136	2.93			132	75	5.5		1	1	1	88	23.3851	111	0.65	0.98	170	37	108	108	12	21	18	7.9	6			100	60
2	50			1	2	56.8	75	85	0.93	0.73	173	35	104	138	0.18	7	16	16			20.1247	1.92			128	82	5.3		1	1	1	78	20.4901	99	0.91	0.73	189	35	124	98	10	15	15	4	5.9			100	62
1	54			1	2	51.1	73	88	1.07	0.85	124	39	63	54	0.1	7	17	14	0.35		17.8282	0.85			133	63	5.1		1	1	2	72	17.397	93	0.83	0.86	124	37	64	54	10	16	17	4	5.8			110	70
2	44			1	1	60.6	74	86	1.13	0.82	180	51	98	42	0.25	11	20	13			24.3057	1.04			107	67	3.3		1	1	1	84	26.0187	90	0.66	0.77	198	52	120	98	11	29	22	3.2	3.8			108	70
2	49			1	1	55.2	80	88	1.2	0.79	259	48	161	152	0.55	10	20	14	0.7		23.125	1.79			126	81	5.3		1	1	2	78	21.6028	98	0.93	0.84	256	46	173	135	12	20	12	5.1	5.4			124	76
2	50			1	2	67.8	78	85	1.22	0.95	229	47	149	71	0.32	10	16	10	0.27		28.4036	0.85			117	70	4.8		1	1	1	86.5	27.7264	84	0.67	0.95	207	34	125	243	11	17	10	3.2	5			110	80
2	43			1	2	52.6	71	86	1.2	0.82	197	63	102	59	0.56	11	18	14		49.8333	22.353	1.54			119	71	4.8		1	3	1	73.2	22.0289	90	0.76	0.86	178	57	99	40	12	20	12	2.5	4.9		4.09	122	69
2	46			1	2	56.3	80	101	0.83	0.83	175	55	84	94	0.1	9	19	13	0.35		22.2977	1.69			123	73	5.3		1	3	1	75.2	22.354	87	0.84	0.8	165	34	79	214	14	21	16	3.8	5.1			100	60
1	50			3	2	57.8	79	110	0.54	0.87	200	41	126	103	1.66	25	31	22			22.0241	1.49			130	72	5.6		2	1	2	81	21.7193	101	0.52	0.88	186	30	120	141	18	25	25	4.9	5.4			120	80
2	41			2	1	49.9	68	85	0.67	0.77	158	58	75	39	0.29	14	30	30			20.5309	1.32			95	57	5.1		1	3	1	70	20.6571	87	0.64	0.79	212	63	119	63	11	26	22	4.4	5.2			98	60
1	53			2	1	75.8	88	99	0.59	0.88	179	38	103	100	36.83	20	21	23		65.8333	27.2771	3.07			136	83	5.5		1	3	1	94	28.7825	88	0.81	0.94	194	33	133	106	25	29	39	5.5	5.3			130	80
2	55			1	1	51.2	68	99	0.54	0.84	174	58	89	70	0.29	9	22	17	0.44		19.4611	3.1			119	75	5.4		1	1	1	76.5	19.8168	93	0.6	0.85	182	48	106	68	14	28	17	3.9	5.3			110	79
2	49			3	1	47.4	64	81	0.5	0.76	180	43	111	52	0.38	10	33	41			20.8714	1.26			102	67	4.8		3	1	1	71	21.3998	95	0.64	0.8	231	38	155	132	16	22	30	4.5	5.1			110	70
2	62		2	1	1	57.1	78	126	1.04	0.82	210	48	128	91	0.59	12	18	20			24.2021	3.18			137	83	5.9		1	1	2	82.2	23.7399	129	0.86	0.94	162	35	83	161	15	26	25	4.1	6.4			110	76
2	51			1	1	43	62	85	0.89	0.83	254	84	137	64	0.23	8	19	9			19.3166	2			128	72	4.9		1	1	1	65	17.2053	89	0.56	0.85	247	82	140	51	13	23	13	3.4	5.5			110	78
2	46			1	2	62.6	80	85	0.9	0.72	203	47	116	111	0.18	9	16	10			27.3462	2.7			128	87	5.1		1	1	1	86	25.8892	87	0.39	0.77	181	45	109	121	13	17	9	3.7	5.7			120	80
2	55			1	1	67.2	86	104	0.57	0.7	194	37	120	114	1.58	24	20	14			26.5812	1.19			137	75	6.2		1	1	1	102	26.779	101	0.49	0.8	227	35	156	158	13	25	23	5.1	5			130	80
2	45			1	1	77.5	96	89	0.73	0.9	180	38	106	103	0.43	7	15	16			29.5306	1.55			131	77	5.2		1	1	2	90	28.4607	82	1.07	0.95	198	33	130	139	10	18	15	6.2	5.2		6.36	100	70
1	43			3	1	58.9	74	85	1.52	0.94	189	42	116	77	0.38	11	20	20		18	21.3747	0.64			113	64	4.9		3	3	2	76.5	21.9818	88	0.93	0.99	185	30	117	107	11	20	16	4.1	5.2			110	80
2	53			1	2	70.7	86	90	0.94	0.78	274	41	175	238	0.52	19	30	30			27.8604	1.86			116	65	5.3		1	1	1	95	27.7771	90	0.8	0.88	216	37	141	190	19	31	40	4.6	5.9			118	78
1	56			2	2	68.4	84	95	2.16	1.14	176	40	99	130	0.43	22	24	22	0.6		24.2925	1.64			136	84	5		1	1	2	93.3	25.1205	88	2.17	1.12	180	37	114	132	37	45	67	6.4	5.5			100	70
1	56			1	1	57.6	86	85	1.11	1.03	264	74	153	69	0.3	46	29	43	4.54	150	24.0992	0.89	2.54	6.1	110	80	5.3	16885	1	3	1	84	24.1136	77	0.9	1	196	58	99	44	19	21	18		5.1	0.43		116	82
2	56			1	1	52.5	80	93	0.95	0.89	254	43	176	95	0.36	15	21	17	3.22		23.0558	1.78	11.02	4	130	80	5.2	9494	1	3	1	82	24.6142	83	0.7	0.87	184	36	111	68	14	16	17		5.1	5.44		138	84
2	49			1	2	72.9	93	91	1.17	0.77	228	56	138	107	0.45	19	23	18	0.72	6.66667	28.4766	1.77	13.44	5.1	120	70	5.6	16280	1	3	2	91	27.5403	81	1.5	1.01	215	64	122	74	19	18	13		5.9	0.69		121	90
2	51			1	1	58.4	89	109	0.72	0.79	286	47	183	210	4.57	22	22	21	1.08		24.8177	1.96	12.62	5.3	130	70	6.4	4354.3	1	1	1	84	24.4768	120	0.6	0.82	262	44	153	330	22	26	23		6.5	4.31		120	70
1	56			3	1	50.9	77	81	0.66	0.81	200	66	102	65	1.6	18	22	16	0.7	107.143	20.519	0.92	1.72	5.2	120	80	5.6	11565	3	3	1	76	20.0414	81	0.81	0.85	179	56	91	77	18	19	18	3.9	5.8			120	80
1	54				2	62.6	79	90	1.03	0.84	225	61	123	130	0.23	15	28	19	0.71		20.8438	1.22	2.51	4.2	120	80	5.5	18718	1	1	2	79	21.1861	75	1.1	0.93	183	55	96	51	8	31	15		5.1	0.11		106	62
2	49			1	1	60.6	80	84	1.02	0.66	224	50	137	94	0.27	23	19	15	1.59		25.3872	1.34	10.56	4.3	110	70	5.6	10065	1	1	1	89	27.4984	89	0.6	0.8	249	54	146	104	53	34	53		5.1	10.4		110	66
1	64			1	1	55.3	77	85	0.72	0.81	227	55	125	189	0.51	16	24	18	0.97		22.0959	1.32	1.91	2.8	110	70	5.1	15587	1	3	2	78	21.3656	86	0.68	0.93	192	50	116	155	15	18	13	3	4.7			148	92
2	56			1	1	55.9	79	97	0.97	0.75	267	50	166	159	0.79	14	22	14	1.5		22.6207	1.69	7.27	3.3	110	80	5.8	11313	1	1	1	88.5	25.0066	102	0.94	0.79	249	60	170	186	16	18	15	3.5	5.3			130	90
1	46			2	1	68.1	90	90	1.05	0.93	148	54	50	187	0.16	69	39	49	0.99	125	26.1745	2.68	3.21	4.5	115	80	5.4	7611	1	3	1	90.2	25.4153	91	0.62	1.01	171	44	89	109	29	21	18	4.7	5.4			110	70
2	46			1	1	50.5	79	85	0.79	0.69	155	45	75	129	0.26	12	25	24	0.76	21.4286	22.2364	2.91	8.7	3.3	120	85	5.2	7488.3	1	3	1	80	24.4798	90	0.87	0.86	198	35	114	196	18	20	17	5	5.6			120	70
2	66			1	1	68.8	100	90	0.66	0.79	207	43	110	214	1.71	14	28	24	1.69		26.2479	2.03	5.29	5.2	120	80	5.9	14397	1	1	1	101	27.6007	93	0.65	0.92	185	48	106	121	18	34	40	6.4	6.4			110	70
2	43			1	1	75.6	97	93	0.46	0.56	233	52	129	176	6.88	42	21	31	2.09	36	30.946	3.27	17.8	3.9	110	70	5.2	7822.8	1	3	1	100	31.464	86	0.8	0.53	202	52	104	163	35	23	24		4.8	0.95		139	82
2	63			1	1	44.3	79	89	0.73	0.61	212	37	118	239	4.12	13	23	17	1.36		21.6032	1.32	3.72	3.7	90	60	5.8	12643	1	1	1	70	21.2559	90	0.7	0.69	172	40	94	139	7	17	10		5.5	0.3		103	61
2	50			1	1	42.2	89	94	0.62	0.59	279	41	185	146	1.35	17	32	22	0.71		24.8938	1.78	4.96	4	110	80	5.4	21193	1	3	1	74	24.2294	95	0.6	0.65	198	42	115	88	15	32	22		5.2	0.73		118	63
1	60			3	2	65.3	84	84	0.75	0.77	233	44	142	117	0.94	119	43	49	2.76		24.6986	2.91	1.7	5.4	110	65	5.1	5702.3	3	1	2	84	25.0962	99	0.7	0.87	245	47	158	110	53	26	30		4.9	0.48		126	80
2	58			1	1	56	90	111	0.83	0.82	278	47	145	408	4.2	42	31	28	85.13		26.0212	2.13	14	6.4	120	80	6.2	13445	1	1	1	88	23.8319	88	1	0.82	236	46	132	152	17	22	11		6	1.44		159	60
2	45			1	1	68.3	85	86	0.69	0.8	241	54	145	111	0.22	26	22	17	1.9		25.2093	2.67	14.92	4.6	115	80	5.4	12041	1	3	1	94	25.709	98	0.8	0.78	199	56	108	76	16	18	13		5.3	0.48		116	82
2	48			1	2	64.3	83	85	0.55	0.63	183	59	87	94	9.2	10	24	21	0.74	86.9048	26.3879	1.73	10.7	2.2	130	80	5.5	12050	1	3	2	84	27.2568	91	0.7	0.83	209	66	106	106	10	25	19		5.6	0.89		110	73
2	53			1	1	45.6	74	87	1.39	0.66	194	52	105	110	0.25	11	23	13	3.11		20.79	1.29	1.55	3.3	130	80	5.6	12993	1	1	1	69	20.2241	86	1	0.66	158	52	75	64	12	20	14		5.4	1.13		108	70
2	52			1	1	69.8	97	82	1.08	0.82	246	46	142	204	0.72	31	24	25	0.76		30.3709	2.98	14.4	6.6	110	70	5.5	6234.5	1	1	2	93	29.1192	85	1	0.82	241	45	150	238	20	24	22		5.6	3.24		127	91
1	44			3	1	72.3	91	99	0.5	0.98	203	35	102	314	6.07	32	26	38	1.72	12.5	24.1014	2.3	1.93	6.2	110	60	5.6	6584.5	3	3	2	85	23.2419	101	0.75	1.01	179	42	100	111	15	15	16	5.2	5.7			100	60
2	47			1	2	55.9	74	100	0.6	0.79	193	60	100	58	0.42	15	21	19	0.82	91.6667	24.2268	1.55	4.23	5	110	70	5.1	11698	1	3	2	77	21.7763	104	0.5	0.86	173	49	99	77	11	21	17		5.4	0.8		126	82
2	51			1	1	40.8	68	92	0.55	0.69	166	48	85	67	0.69	16	24	20	1.73	22	17.8466	1.2	1.77	3.3	100	60	5.4	15041	1	1	1	65	16.8664	82	0.6	0.7	200	54	119	89	13	27	24		5.4	0.77		110	62
2	67			1	1	55	92	98	0.9	0.8	293	52	187	152	3.51	27	25	25	5.35	50.6667	26.2679	2.47	12.12	5	130	70	5.7	9486.8	1	3	1	92	27.7778	103	0.6	0.84	255	44	155	289	47	26	29		5.6	8.68		120	70
2	59			1	1	63.1	89	89	0.9	0.96	167	29	92	186	1.89	27	26	23	1.92		25.6321	1.86	10.03	4.9	120	70	5.6	11228	1	1	1	92	25.2325	88	1.1	0.87	166	36	93	187	41	32	41		5.4	2.58		120	71
2	47			1	1	75.2	97	98	1.17	0.96	162	37	96	91	0.25	17	26	22	1.78		28.5835	2.69	14.29	4.4	120	70	5.3	6270.1	1	1	2	99	28.4929	90	1.5	0.79	172	41	96	107	9	22	15		5	0.14		130	89
2	40			1	1	58	80	87	1.38	0.98	263	57	164	85	0.25	26	23	22	1.49	84.1667	24.0793	1.52	8.07	4.4	100	70	5.3	6419.6	1	3	2	86	23.9133	98	0.7	0.84	214	66	117	95	24	26	21		5.7	0.14		111	69
2	69			1	1	58.3	92	87	0.86	1	259	63	144	150	1.74	24	33	25	1.9	12.5	26.2954	3	12.09	3.5	130	70	5.7	11541	1	3	2	86	25.7857	85	1.2	0.78	205	74	98	64	14	28	13		5.2	3.45		140	90
1	55			3	1	70	87	103	1.15	1.17	199	46	120	116	1.5	42	41	63	0.92		23.8274	3.6	4.88	6.3	135	80	5.7	5277.5	1	1	1	87	23.2077	93	2.1	1.1	178	42	109	71	27	31	31		5.2	2.37		148	94.5
2	52			1	1	64.6	87	94	0.51	0.9	205	34	107	351	0.47	34	20	21	0.81		27.9238	3.81	15.41	4.8	110	80	6.2	6252.5	1	1	1	80	26.7512	90	0.8	0.76	233	52	149	89	16	26	24		5.3	0.7		118	70
1	42			2	1	62.6	80	80	0.54	1.04	159	41	90	69	0.04	9	21	19	0.72	8.33333	21.3085	1.36	1.19	4.9	115	80	5.2	5462.2	1	3	1	78	21.6664	78	1.1	0.92	165	42	98	77	10	19	17		4.8	0.11		119	69
1	56			1	1	67.6	93	102	1.3	1.09	232	38	151	151	1.15	29	25	29	2.03		24.8301	2.23	2.83	7.6	130	80	6.1	3314.7	1	1	1	97	25.7261	100	2	1.01	265	42	180	132	25	24	29		5.5	0.67		102	70
2	53			1	1	73.2	95	94	0.86	0.82	205	57	109	118	0.98	32	35	51	7.47		31.0262	2.53	21.98	5.1	120	80	6.2	2607.2	1	1	1	94	30.2511	93	0.9	0.7	188	54	99	119	34	49	61		5.5	1.36		120	70
2	42			1	1	45.8	72	82	0.57	0.9	187	53	89	160	0.16	13	20	15	0.72		19.1871	1.53	4.64	4	100	60	5.5	18847	1	1	1	68	17.8234	86	0.9	0.89	162	52	72	121	14	22	18		5.6	0.07		111	62
2	41			1	2	71.3	94	89	0.67	0.78	302	43	211	217	2.58	19	21	22	0.87	41.6667	27.1346	3.95	26.21	3.7	110	70	5.6	8238.1	1	3	2	97	28.394	78	0.9	0.75	269	49	173	162	18	18	22		5	1.55		110	79
1	44			1	1	73	91	85	1.27	0.94	170	36	100	108	4.58	42	28	38	1.63		22.9111	1.81	2.77	5.2	110	70	5.1	5987	1	1	1	88	23.4761	85	2	0.88	140	33	78	117	38	25	39		4.5	0.56		131	82
2	50			1	1	62.3	88	99	0.62	0.79	198	45	120	116	1.1	11	21	14	1.88	49.1667	27.5052	3.7	9.99	3.6	110	70	5.6	5868.6	1	3	1	87	28.8444	92	0.7	0.77	293	59	177	165	23	25	28		5.4	2.61		120	78
1	52			3	1	64.4	85	85	0.65	1.03	199	38	89	474	3.74	77	68	110	2.72	125	23.2584	1.28	2.2	6.1	120	70	6.2	3514.1	2	3	1	84	23.3626	87	1	0.99	211	36	101	409	84	71	136		5.6	1.25		144.5	94
1	58			3	1	71.8	92	87	1.04	1.01	183	49	84	228	0.58	37	23	37	0.99	196.429	28.5802	2.36	3.48	5.8	110	80	5.4	6275.1	3	3	1	98	30.2399	91	1.7	0.92	140	51	58	84	34	24	26		5.1	15.43		132	82
1	60			2	1	79.5	101	85	0.79	1.16	264	49	179	133	0.54	51	33	32	0.87	53.5714	30.4051	2.7	10.59	7.1	120	80	5.4	10165	1	3	1	103	30.1311	93	1	1.04	262	55	163	125	52	31	27		5.9	0.75		110	70
2	56			1	1	41.5	68	93	1.11	0.82	203	53	121	94	0.65	11	27	20	0.74	28.3333	20.0692	1.22	3.25	3.6	110	80	5.2	23610	1	3	1	66	19.5005	86	1.3	0.77	214	59	118	72	12	24	16		5.6	0.4		110	70
1	58			3	1	57.4	78	82	0.73	1.03	215	44	136	114	0.3	13	34	22	2		21.058	1.17	0.79	5.1	100	70	5.7	13368	3	1	1	76.2	20.2388	95	0.65	1.02	211	42	138	105	14	20	17	6.2	5.9			94	58
1	53			1	1	54.7	76	86	0.93	0.92	241	42	149	208	0.44	16	28	26	2.49	71.4286	22.3622	1.21	1.29	4.8	100	70	5.6	18998	1	3	1	76	21.4362	84	1.2	0.91	175	43	111	73	9	31	30		5.2	0.33		100	60
1	40	4		3	1	69.6	83	103	0.72	1.04	234	47	152	113	0.5	19	24	20	10.09	29.1667	25.6891	1.85	2.04	5.9	120	80	5.8	2966.4	3	3	1	88	25.4987	95	0.5	0.91	184	34	102	177	11	21	18		5.4	0.6		115	81
1	53		2	3	2	69.4	93	92	0.56	0.92	198	51	115	85	0.3	135	31	24	0.74	71.4286	25.6777	1.27	4.61	4.9	105	70	8.7	5714.3	3	3	2	92	23.655	173	0.8	0.84	145	55	66	126	250	34	33		8.4	0.08		120	70
1	48			2	1	76.6	89	87	0.86	1.4	200	37	127	89	0.9	17	27	28	7.85		24.0141	1.62	3.36	6.2	120	80	4.9	11048	1	1	1	80	21.3269	94	0.7	1.17	151	28	87	112	16	24	13		5.3	0.24		120	69
2	40			1	1	55.3	74	83	0.67	0.79	181	58	94	38	0.25	12	18	14	1.52		24.0935	1.37	11.58	3.5	110	80	4.8	11636	1	1	1	69	22.5587	86	1.1	0.73	153	46	79	44	12	16	10		5.3	0.15		109	69
1	48			1	1	58.4	82	85	0.87	1.15	199	54	115	61	0.25	15	28	24	0.91		19.7634	1.34	0.95	5.8	110	80	5	15295	1	3	1	77	19.5274	82	0.8	0.96	205	60	122	68	14	32	23		5.2	0.24		120	70
2	47			1	1	64.4	89	84	0.64	0.85	214	43	131	137	0.5	12	23	19	0.73	26.6667	26.7019	1.94	7.51	4.1	125	85	5.2	15340	1	3	1	86	25.7564	92	0.8	0.72	218	42	152	54	15	24	17		5.9	1.58		110	69
2	51			1	1	66	89	86	0.6	0.8	207	51	121	91	0.85	15	25	19	0.74	12.5	26.7419	1.86	13.31	3.7	110	80	5.7	10667	1	3	1	90	25.8681	88	1	0.71	166	43	90	80	10	20	20		5.4	0.26		121	62
1	64			3	2	57.2	88	78	0.69	1.37	214	49	118	154	2.84	45	50	63	0.94		21.2671	1.63	2.69	5.9	110	80	5.3	10043	3	1	1	75	19.6575	82	0.8	1.09	183	50	97	76	105	52	66		5.1	2.1		130	75
1	45			1	1	79.6	97	88	0.65	1.43	257	41	166	237	0.88	99	48	74	79.25	29.1667	27.7715	1.96	8.96	9.1	125	80	5.8	9220	1	3	2	98	26.1666	81	0.7	1.22	228	37	157	169	52	31	30		6.3	1.28		110	69
2	43			1	1	73.7	98	90	0.61	0.89	201	55	111	90	1.09	12	20	21	0.76	29.1667	29.0062	2.49	24.8	3.6	110	70	5.5	11210	1	3	1	96	28.734	93	0.7	0.77	164	45	96	83	15	26	28		5.8	0.75		110	68
1	50			3	2	63.5	78	95	0.39	1.02	174	43	92	118	3.9	14	33	28	0.99		23.2115	1.38	0.55	3.6	110	80	5.7	12859	3	1	2	82	23.8635	92	1.2	0.85	177	30	95	238	13	32	43		5.6	0.6		70	42
1	64	4		3	1	67.7	93	88	1.22	1.28	174	40	99	102	8.81	21	25	17	0.93		27.0164	1.56	3.36	6.5	120	80	5.2	9234.9	3	1	2	89	25.6231	90	0.76	1.28	160	36	98	87	12	23	13	7.2	5.6			122	80
2	42			1	1	59.3	76	93	0.74	0.98	203	51	118	80	0.31	10	22	15	0.74		22.5956	1.76	4.61	4.3	110	80	5.7	8464.4	1	1	2	82	23.1862	107	0.5	0.8	196	46	103	188	19	26	23		6.2	0.2		120	80
1	69			1	1	63.7	92	94	0.64	1.13	168	39	94	124	0.79	18	24	19	1.37	50	24.9764	1.98			130	80	5.3	13300	1	3	1	88.3	25.4113	95	0.78	0.9	146	32	87	118	16	21	26	3.6	5.5			130	70
2	61			1	2	54.9	86	127	0.65	0.87	207	52	119	142	0.61	22	22	18	2.83	1.66667	25.826	2.43	6.96	4.9	110	80	7.3	11239	1	3	1	86.2	23.4517	131	0.67	0.76	163	50	96	79	15	21	13	4.4	7.3			130	80
2	69			1	1	50.8	81	98	1.14	0.98	338	59	246	107	1.42	74	115	106	1.11		21.8723	1.97	9.04	3.6	130	80	5.3	13465	1	1	1	84	21.3078	93	0.82	0.92	272	39	204	177	42	35	29	3.7	5.3			102	70
1	48			3	2	74.9	90	89	0.95	1.17	233	39	152	157	0.65	39	28	29	3.05	50	25.9475	2.03	3.8	6.7	110	80	5.5	10926	3	3	1	82	25.49	86	1.1	1.1	232	39	144	186	41	21	24		5.1	0.63		126	78
1	40			2	1	57.1	79	95	2.11	1.02	197	42	124	87	0.16	12	24	20	1.44	16.6667	20.4986	1.29	0.5	6.1	130	80	4.9	10745	1	3	1	75	19.3683	98	1.3	0.98	164	42	99	97	13	22	16		5	1.52		120	70
2	59			1	1	61	85	100	1.33	0.87	280	48	180	281	1.03	31	54	69	1.85		26.0584	1.99	16.93	5.5	110	80	6.3	3019.1	1	1	2	79.5	24.898	113	1.24	0.89	258	42	189	137	14	25	24	5.7	6.4			106	76
1	60			3	2	59.2	82	99	0.51	1.02	235	36	160	196	0.92	16	20	13	0.84		22.6974	2.93	1.37	4.5	120	80	5.9	4216.9	3	1	2	86	21.9194	93	0.8	0.89	226	33	139	199	16	21	20		5.8	1.19		117	68
2	59			1	1	56.6	87	95	0.6	0.86	206	53	125	59	0.44	9	19	15	1.24	16.6667	25.1891	1.64	5.44	4	130	80	5.4	14874	1	3	1	90	25.5452	96	0.9	0.75	248	76	148	88	12	20	16		5.5	0.46		141	100
2	65			1	1	53.1	88	89	1.09	0.79	222	34	148	271	0.75	12	28	20	0.7		25.1861	2.57	4.5	3.2	130	80	5.6	15546	1	1	1	86	24.6351	89	0.8	0.66	199	31	124	216	10	27	18		5.8	1.69		120	70
1	58		3	1	1	63.5	90	123	0.86	0.92	146	27	99	134	2.18	29	27	18	0.88	125	27.8497	2.06	2.87	5.6	120	80	6.6	7403.3	1	3	1	91	27.0483	152	1.2	0.83	157	32	108	109	32	21	18		8.3	1.8		140	90
2	64			1	2	56.7	95	96	0.59	0.8	184	39	113	187	1.11	10	30	21	0.94		27.0798	2.19	13.39	4.1	130	70	5.4	12993	1	1	1	86	23.7799	99	0.57	0.78	178	44	114	66	11	23	17	4.6	5.5			150	80
1	56			1	1	72.3	88	88	0.6	1.14	158	45	90	96	0.1	12	24	20	7.01	171.429	24.1014	1.41	1.07	5	110	80	5.2	7849.1	1	3	1	87	23.4989	87	0.9	1.04	162	45	72	183	11	22	27		5.6	0.05		110	70
2	43			1	1	57.8	73	83	0.57	0.98	216	69	127	61	0.23	16	23	20	13.75		22.5781	1.83	8.03	5.1	100	80	5.6	15654	1	1	1	74	25.7939	84	0.7	0.96	202	58	108	57	11	21	13		5.4	0.2		100	60
1	42		3	2	1	51.8	75	239	1.25	1.02	183	47	113	94	0.27	50	24	25	0.8	86.5714	19.9095	3.01	1.36	4	110	80	11.3	9931.2	1	3	1	70	21.5208	137	1.4	0.94	175	61	83	78	22	27	28		6.5	0.37		101	68
2	53			1	1	52	73	95	0.61	1.03	215	44	140	122	0.43	12	42	16	1.46		20.061	1.68	3.14	3.3	130	80	6	15768	1	3	1	72	18.4178	101	0.7	0.78	214	54	123	80	10	34	20		6	1.02		112	77
1	58			2	1	56.7	87	90	0.95	1.06	207	51	125	203	0.52	54	51	47	2.01	187.524	23.1502	1.22	2.02	4.7	120	80	5.1	6432.8	1	3	1	84	21.6552	109	1.1	0.87	164	42	87	178	34	33	30		5.2	0.76		152	100
1	56			1	2	65.5	92	90	0.51	1.13	212	50	114	271	0.23	61	38	31	0.79		26.0068	1.62	2.73	5.9	110	70	5.3	4103.9	3	3	2	80	23.303	83	0.9	0.98	156	42	90	160	28	27	20		5.5	0.19		122	80
2	51			1	2	58.8	76	86	0.61	0.87	159	44	86	94	1.27	16	27	14	1.84		25.8568	1.29	3.24	3.2	110	80	5.1	25071	1	1	1	86	26.5069	85	0.6	0.74	187	48	100	81	27	20	14		5.1	13.16		110	70
2	53			1	1	60.2	80	91	0.52	0.87	191	49	115	100	0.16	8	22	19	3.97		26.8629	2.14	10.67	2.8	110	70	5.4	19198	1	1	1	78	26.7556	89	0.8	0.75	242	50	151	92	8	24	17		5.3	0.06		120	66
1	60			1	1	62.9	90	82	0.61	1	205	60	115	79	2.65	26	32	26	1.58		22.233	1.05	0.5	5	120	70	5.1	13772	1	1	1	80	21.5261	86	1.3	0.87	187	65	92	43	18	29	20		5	0.73		112	70
2	53			1	1	50.2	75	84	0.77	0.9	218	49	137	105	1.16	10	26	15	1.06		21.5009	0.88	4.49	3.2	120	70	5.4	13142	1	1	1	85	22.2049	77	1.2	0.76	206	51	117	99	11	25	21		5.5	0.3		126	80
2	47			3	1	56	77	97	0.44	0.79	293	48	193	222	1.37	280	41	62	0.87		22.719	3.6	8.79	2.7	110	70	5.8	9879.4	3	1	1	84	23.0922	96	0.3	0.66	195	41	125	115	184	70	104		6.5	2.18		110	70
2	66		2	1	1	57	92	89	0.94	0.81	198	40	128	129	0.42	20	20	16	1.68		24.3178	9.63	7.39	3.1	100	70	7.1	5543.4	1	1	1	88	25.1743	113	1	0.98	162	36	96	118	24	20	16		7.6	0.65		110	70
2	48			1	1	55	85	92	1.17	0.85	209	51	123	158	0.37	16	22	16	0.77		22.1437	1.81	5.36	2.3	110	80	5.2	10996	1	1	1	78	21.4628	79	1.2	0.67	200	60	105	74	11	19	12		5.3	0.46		111	71
1	66			1	1	61.8	89	101	0.89	1.06	253	48	170	129	1.11	20	29	23	0.82	5	22.8379	1.52	1.18	5.6	100	70	5.5	14605	1	3	1	90	23.1211	89	0.6	0.79	189	33	120	177	19	24	17		5.7	0.9		111	69
2	60			1	2	52.2	77	85	0.78	0.81	213	73	111	110	0.85	13	30	19	0.89		22.2991	1.55	7.93	3.7	120	80	5.1	35499	1	1	2	80	22.1323	84	0.6	0.9	239	65	139	95	21	26	28		5.3	0.57		109	76
2	61			1	1	56.2	104	91	0.6	0.92	238	41	150	188	8.53	34	33	27	0.87		28.3889	1.81	13.4	5.2	130	80	5.7	13762	1	1	1	92	27.4163	85	0.5	0.74	202	37	91	455	20	28	23		5.6	1.91		121	70
2	53			1	1	70.4	103	115	0.93	0.78	201	47	120	170	0.27	33	27	16	1.14	89.2857	28.416	2.09	15.24	4.8	115	80	6.2	16784	1	2	1	98	26.9065	103	1.3	0.86	261	47	165	136	23	16	7		6.1	2.25		88	58
2	44			1	1	54.6	82	82	1.18	0.85	180	42	106	102	6.72	11	35	35	0.77		23.9146	1.25	5.73	4.8	110	70	5.1	16510	1	3	1	77.2	23.3552	91	1.1	0.81	202	50	128	140	14	29	22	4.7	4.9			120	82
2	63			1	1	68.3	102	97	0.77	0.88	217	43	132	177	0.69	20	29	25	1.12		30.9719	3.06	30.74	3.2	130	80	5.6	8730.3	1	3	1	103	28.4828	98	0.69	0.81	153	37	87	119	11	21	15	3.7	5.6			110	70
1	61			3	1	53.5	79	95	0.81	0.97	152	48	80	58	124.98	118	49	38	12.33	5	18.888	1.18	1.53	3.4	120	80	6.2	10741	3	3	1	79	17.8249	130	0.6	0.82	142	56	58	66	21	34	23		5.9	50.45		120	75
1	53			3	1	68.7	84	86	0.71	1.14	240	46	142	199	16.01	14	21	17	1.11	8.33333	23.0075	1.08	2.03	6.2	115	75	5.5	8003.8	3	3	1	84	22.1772	90	0.5	1.1	252	55	151	89	15	19	8		5.3	0.62		120	79
2	48		2	1	1	62.9	89	180	0.93	0.95	192	37	114	166	0.55	20	26	29	3.51	25.8333	24.0862	3.45	5.14	4.3	110	80	8.2	15264	1	3	2	82	24.3313	165	1	0.83	176	38	98	143	26	18	19		6.9	3.37		126	81
2	45			1	1	56.3	79	98	0.56	1.02	214	63	108	160	9.36	44	22	15	0.79	25	25.3592	1.85	9.02	3.3	110	70	6	14913	1	3	1	77	24.3513	103	0.7	0.82	168	57	74	116	56	23	20		5.6	23.73		127	85
2	42			1	1	52	75	85	1.12	0.89	197	40	117	127	0.27	12	18	16	0.84	5	21.3675	1.24	5.12	4	110	80	5.3	11597	1	3	2	75	20.0372	97	1.03	0.83	192	45	117	93	17	21	12	3.7	5.6			118	70
1	58			2	2	64.7	84	91	0.56	1.16	227	44	143	162	1.58	56	49	49	1.55	125	22.0748	1.52	2.29	4.9	130	80	6.1	11610	3	3	2	83	20.7585	98	0.7	0.98	190	38	111	134	26	26	15		5.6	1.34		114	81
1	49			3	1	71.7	91	103	1.04	1.1	138	30	80	78	2.36	23	26	30	0.9	178.571	27.0527	1.67	1.84	5.2	110	80	6	6522.7	3	3	1	88	25.6059	100	1.2	1.03	167	32	91	241	23	23	22		6.1	0.38		111	72
2	44			1	1	57.5	80	86	1.04	0.86	205	46	117	160	1.1	17	17	17	0.77		24.4672	2.77	13.48	4.2	120	80	5.5	6674.2	1	1	1	80	24.4778	76	1.3	0.83	225	51	131	169	15	17	15		5.6	0.54		122	86
1	53			3	1	61.6	82	90	0.97	1.12	157	51	60	165	2.08	41	20	14	2.22	53.5714	20.9193	1.53	2.05	5.4	110	70	5.4	5826.3	3	3	1	77	20.0188	88	1.4	0.96	147	59	60	51	26	22	14		5.2	0.45		100	70
1	49			3	2	66.6	89	83	0.69	1.16	271	48	174	194	0.78	28	27	42	0.79	53.5714	24.6717	1.91	2.87	6.2	110	70	5.7	4782.4	3	3	1	90	23.9588	89	0.7	1.12	245	46	149	217	35	25	26		5.3	1.26		108	78
2	47			1	1	60.4	80	104	0.94	0.82	197	42	112	145	0.3	25	22	26	9.16		25.7683	3	9.41	4.2	120	80	5.8	9550.4	1	1	1	80	24.2928	87	0.6	0.72	198	53	113	76	23	18	16		5.6	0.27		116	70
1	68			2	1	69.3	97	94	0.81	1.26	223	52	133	118	0.62	12	24	15	0.81	185.143	25.3316	1.07	2.5	7.5	120	70	6	12900	3	3	1	85	22.8657	91	1.2	1.19	210	61	114	71	16	37	20		6	1.55		107	71
2	45			1	1	56.8	80	112	0.87	1	246	46	156	165	0.43	13	19	17	0.94		24.4556	1.79	6.72	4.4	120	70	6.4	20472	1	3	1	82	25.1472	96	1.1	0.87	245	64	145	152	13	21	22		6.8	0.93		136	90
2	48			1	1	47.6	75	82	0.95	0.84	170	42	108	91	0.24	6	23	20	3.14		19.4845	1.55	6.11	3.9	120	80	4.9	23620	1	1	1	65	18.8243	78	1.7	0.73	164	47	89	81	5	14	9		4.7	0.15		120	84
1	68		2	2	1	62	86	111	1.01	0.98	251	46	180	149	1.99	63	43	61	1.82	89.2857	23.6244	1.75	2.49	5.6	120	80	6.5	11248	1	3	1	79	20.2463	122	1.5	0.87	230	59	139	92	41	46	45		6.5	2.43		112	76
2	46			1	1	58	84	82	0.63	0.8	153	42	84	90	34.35	11	27	29	0.87	3.33333	24.1104	1.53	10.65	3.4	110	70	4.8	16517	1	3	2	82	23.8502	86	1.5	0.77	186	63	105	104	14	20	20		4.8	3.36		120	69
1	47			1	1	78.8	95	90	1.59	1.15	304	43	223	298	0.24	105	35	55	1.48	50	26.636	1.9	2.41	6.6	120	80	5.3	9977.8	1	3	1	92	26.566	99	2.2	0.95	207	50	123	119	59	41	55		5.5	0.19		109	68
2	47			1	1	67.2	90	83	1.18	0.81	244	72	147	78	1.2	28	48	55	0.79	11.6667	26.4812	1.31	18.87	4.6	120	70	4.6	16916	1	3	1	89	24.0554	82	0.91	0.81	217	74	107	127	31	36	36	5.1	4.8			170	100
2	42			1	1	69.4	86	86	0.81	0.81	206	46	136	86	0.26	5	24	21	0.66		27.3481	1.44	9.72	5	110	80	4.8	26278	1	3	1	86	26.1715	73	0.55	0.72	194	51	124	-2	11	31	24	5	5.3			123	82
2	59			1	1	44.7	72	85	0.99	0.84	257	54	176	169	4.44	10	28	17	1.39		20.9128	1.22	4.73	3.8	110	70	5	18315	1	1	1	65	18.8075	78	1	0.79	228	54	132	70	11	29	16		5.4	1.36		110	81
1	44			3	1	58	73	90	0.51	1.23	178	44	81	96	4.63	17	27	27	1.3		21.83	1.7			130	80	5.5	12707	3	1	1	75	20.7659	84	0.5	1.17	158	44	92	61	38	29	51		5.3	0.77		119	70
1	60			3	1	58.4	84	96	0.47	0.9	171	36	85	114	3.61	44	24	16	1.02	53.5714	21.6868	1.21	1.93	5.7	120	70	5.7	7874.3	2	2	1	89	22.0498	96	0.7	0.78	163	45	82	82	24	28	21		6.2	5.54		129	88
1	47			2	2	72	90	107	0.73	0.98	201	36	113	124	0.56	29	26	45	5.87	33.3333	25.3892	2	1.32	6.2	120	70	5.7	3553.2	3	3	1	83	24.6647	99	0.9	0.88	204	46	129	123	32	23	29		5.7	0.59		119	79
2	43			1	1	54.6	76	88	0.73	0.8	208	39	120	84	0.2	14	24	21	0.79		24.7594	1.94	6.23	4	110	70	5.1	11035	1	1	1	75	24.0789	89	0.8	0.78	205	48	134	74	12	19	13		5.5	0.13		112	72
1	64			2	1	67.6	99	110	0.95	1.21	215	31	120	200	10.57	20	31	26	4.96	5	25.1338	2.4	3.31	7.1	110	70	5.4	10943	1	1	1	91	23.466	105	1.1	1.17	201	35	117	146	12	27	26		5.7	1.64		120	80
2	63			1	1	48.9	84	98	0.76	0.83	226	40	126	222	0.17	8	28	19	1.35		20.1712	2.33	8.12	4.1	110	70	5.9	13917	1	1	1	73	18.9876	95	1	0.75	197	42	116	102	8	24	16		5.8	0.12		121	92
2	57			1	2	50	83	84	1.06	0.88	209	38	126	136	0.36	18	33	38	1.84		21.9289	1.75	11.41	5	130	80	5.8	4675	1	1	1	73	21.5605	94	1.2	0.75	180	43	99	142	14	28	32		5.5	0.2		132	75
2	59			1	1	55.5	86	98	0.74	0.88	356	55	214	328	1.06	41	31	24	16.65		23.8646	2.35	8.85	5.3	110	80	5.5	13581	1	1	2	82.5	23.087	95	0.72	0.78	293	51	190	236	31	22	17	5.7	5.9			102	60
2	67			1	1	49.8	80	89	0.67	1.03	287	46	178	203	0.53	11	29	11	1.38		24.0162	1.71	5.28	3	120	70	6	13818	1	1	2	75.5	22.6008	92	0.77	0.96	259	55	177	97	11	29	7	2.7	5.9			122	80
2	53			1	1	67	84	87	0.35	1.02	160	34	90	88	2.02	11	28	31	1.16		27.147	4.45	26.06	4.7	110	80	5.6	9031.6	1	1	1	87	25.9574	91	0.6	0.93	159	42	93	100	11	30	28		6.1	0.67		120	82
2	55			1	1	73.2	102	96	0.32	0.76	242	52	144	121	5.3	17	23	21	1.42		33.4638	5.56	27.94	5.5	130	80	6	6361.6	1	1	1	99	31.7695	94	0.6	0.73	227	44	136	233	23	48	49		5.9	5		112	74
1	51			2	1	70.4	93	77	0.93	1.26	224	35	143	183	0.52	12	22	23	0.83		25.89	1.53	2.56	10.1	110	70	4.6	8754.7	1	1	1	88	26.1217	83	1	1.15	176	34	93	197	10	20	18		4.1	0.39		126	79
2	65		2	1	1	52.1	78	140	1.03	0.87	255	44	158	180	5.88	20	21	21	2.71		23.5622	3.36	18.04	3.4	120	80	8	7801.9	1	1	2	83	22.7213	119	1.1	0.76	191	39	108	155	15	29	31		6.8	3.11		119	80
2	41			1	2	53	68	90	0.77	0.94	182	50	91	120	0.14	11	20	15	2.49		20.8855	2.07	4.49	4	120	80	5.2	13389	1	1	1	72	21.5955	83	1.2	0.78	185	51	113	92	12	18	12		5.6	0.22		110	70
2	55			1	1	59.5	84	94	1.01	0.87	211	62	108	75	0.23	46	26	25	1.11		25.1866	2.28	8.07	4.9	120	80	5.2	18359	1	1	1	83	23.4579	85	1.1	0.78	182	48	102	121	37	31	37		5	0.18		110	70
2	57			1	1	52	80	95	0.49	0.91	265	48	156	238	1.13	13	29	20	0.78		23.4224	1.66	8.35	2.7	110	80	5.7	14651	1	1	1	83.5	23.3606	91	0.68	0.82	184	56	86	92	19	39	35	2.6	6.1			78	42
2	53			1	1	65	79	76	0.54	0.78	213	49	124	75	0.38	6	29	18	0.85		25.3906	1.2	5.52	4.5	120	70	5.2	19913	1	3	1	89	26.224	80	0.8	0.67	213	55	117	104	11	33	23		5.4	0.65		107	68
2	43			1	2	78	83	93	1.28	0.87	158	48	74	104	0.95	14	22	18	0.77		29.3575	4.13	18.74	4.2	100	60	4.8	10731	1	3	2	93	28.5266	86	1.6	0.82	180	54	86	141	12	20	15		4.7	0.24		110	70
2	66			1	1	62.9	87	96	0.41	0.89	197	44	113	78	6.36	10	27	21	1.32		25.421	1.51	15.33	2.9	110	80	5.9	19581	1	3	1	86	25.5098	90	0.9	0.75	175	42	98	98	11	25	19		6.4	0.39		110	72
2	61			1	1	50.7	84	87	0.46	0.83	242	46	144	187	0.78	12	28	26	0.93		24.7242	2.91	13.87	4.6	122	60	5.5	9815.3	1	1	1	90	26.1129	83	0.3	0.75	212	43	125	227	26	35	41		5.4	0.83		120	82
1	51			2	1	76.7	93	99	0.93	1.2	213	45	114	244	0.84	34	34	44	2.34	64.6667	26.7597	2.76	3.71	5.3	130	80	5.3	10610	3	3	1	92	26.6197	97	1.1	1.05	193	44	122	121	24	34	38		5.7	0.45		144	94
2	51			1	2	61.6	77	87	0.76	0.83	242	69	117	193	0.16	17	25	26	0.81		25.541	2.07	12.3	2.7	120	80	5.4	18988	1	1	2	78	24.7464	98	0.7	0.78	221	47	137	133	9	24	19		5.5	14.3		110	72
1	60			2	1	65.9	88	83	0.55	0.88	250	52	148	179	0.31	45	32	33	1.14	142.857	24.5917	2.19	2.61	6.5	120	70	5.2	3328.3	1	3	1	90	23.4236	86	0.83	0.84	274	55	160	478	104	41	38	7.9	5			127	90
2	54			1	1	51	79	85	0.91	0.82	276	46	187	103	0.19	18	25	25	1.5		20.7963	2.25	6.72	3.9	110	80	5.3	7869.3	1	1	1	75	19.4862	80	1	0.71	189	48	106	101	14	17	23		5.3	0.22		111	61
1	57			1	2	73.1	83	94	0.74	1.17	186	55	99	46	0.12	16	27	21	2.2		24.1168	1.53	0.94	2.7	120	70	5.3	18085	1	1	2	87	23.9022	89	0.8	1.09	175	62	93	38	18	30	26		5.5	0.24		111	79
2	68			1	1	52.5	79	87	0.58	0.81	194	39	106	169	1.53	16	31	27	2.65		25.495	1.9	13.05	3.7	110	80	5.6	15310	1	1	1	92	25.348	100	0.6	0.78	200	42	120	101	19	26	28		6	24.65		110	65
2	45			2	1	59	83	104	0.62	0.86	181	39	102	52	4.6	22	24	15	3.1		22.1519	3.28	3.43	6.2	100	70	5.2	6327.3	3	1	1	75.2	21.1239	92	0.31	0.65	187	49	109	67	32	21	14	4.9	5.4			102	62
2	43			1		54.2	69	98	0.62	0.66	177	49	88	42	0.49	20	21	19	2.47		21.3852	1.52	3.43	3.6	110	70	5.6	12973	1	1	1	85	22.4707	100	0.57	0.65	173	51	99	47	32	17	20	3.4	5.7			102	70
1	44			2	1	72	83	99	0.8	0.97	201	32	119	155	7.55	18	33	19	1.14		26.1286	1.03	1.1	4.7	120	80	4.9	6582	1	3	1	84	24.1104	77	0.62	0.93	230	53	142	160	49	41	41	6.3	5.1			130	90
2	45			1	1	48.3	71	89	0.52	0.86	223	53	114	181	0.02	22	25	33	0.89		21.3243	2.74	8.32	2.6	130	70	5.7	12558	1	1	1	70	20.662	82	0.5	0.81	179	50	88	96	9	21	11		5.3	0.93		110	80
2	53			1	1	68.8	87	82	0.59	0.87	250	52	146	105	0.5	16	24	24	1.76		28.2347	1.55	19.71	5.4	110	80	5.6	9879	1	1	1	97	27.6191	83	0.6	0.82	244	46	152	200	13	26	22		5.7	1.75		118	81
2	43			1	1	64.2	82	99	0.73	0.77	210	57	110	74	0.62	21	26	22	0.78	18	27.6055	1.42	7.91	3.9	100	70	5.4	15860	1	1	1	73	23.8724	95	0.84	0.79	173	55	91	124	17	21	15	4.8	5.3			120	76
2	44			1	1	64.8	85	84	0.87	0.97	211	51	109	112	0.6	16	19	17	1.04		24.8137	1.47	8.41	4	120	80	4.8	6264.4	1	1	1	77	23.9188	85	1.2	0.93	178	57	100	154	11	16	10	3.9	4.8			110	70
1	43			3	1	69.6	86	86	1.07	1.17	180	46	84	175	10.18	150	32	39	1.23	125	23.5536	1.69	2.47	7.6	130	80	4.8	6056	2	3	1	84	23.581	93	0.84	1.13	208	46	123	208	114	31	47	6.5	5.2			124	80
2	48			1	1	65	92	96	1.06	0.77	215	47	120	111	0.39	22	27	23	0.85		28.6973	1.56	12.61	4.4	130	70	5.4	11332	1	3	1	93	29.7983	95	1.6	0.69	210	58	114	89	14	21	17		5.5	1.33		152	98
2	46			1	1	48.3	70	86	1.1	0.84	148	50	69	55	0.59	8	23	16	2.83		21.0159	1.21	4.87	2.1	110	70	5.3	14364	1	1	1	76	21.0023	87	1.01	0.8	168	56	81	73	12	25	16	4.4	5.5			110	70
2	63			1	1	50	78	87	0.91	0.95	235	46	140	117	10.83	14	23	14	2.18		22.5215	1.05	6.61	4.8	130	70	5.4	11658	1	1	1	72	21.0977	80	0.9	0.92	193	44	106	135	12	22	15		5.4	0.11		124	83
2	46			1	1	62.2	78	93	0.71	0.84	151	47	72	56	1.12	5	27	21	2.18	28.5714	21.8555	1.76	6.26	4	120	80	5.4	5242.6	1	3	1	74	21.2581	91	0.6	0.78	145	55	72	49	7	17	13		4.9	0.27		119	81
1	62		3	3	2	61.6	89	160	0.68	0.95	185	35	109	126	0.37	43	33	33	1.02	50	24.0325	1.75	1.76	3.3	110	70	5.9	8346.7	3	3	2	88	21.9489	133	0.7	0.81	168	39	106	100	35	28	37		7.2	2.09		110	70
2	59		2	3	1	56.4	77	120	0.62	0.94	198	37	113	135	0.84	15	26	20	2.43	14.2857	22.0588	1.72	7.23	5.5	90	70	5.4	11026	3	3	2	83	21.58	148	0.6	0.78	260	42	176	226	14	27	26		11.5	1.27		100	70
2	49			1	2	57.8	86	105	0.7	0.81	203	48	115	101	2.09	16	26	28	0.95		25.3498	1.68	12.75	3.8	110	80	5.5	6869.5	1	1	1	86.2	25.1788	144	0.66	0.87	188	50	126	142	18	18	18	4.1	8.4			130	84
2	58			1	1	57.1	86	104	0.69	0.86	206	46	121	75	0.96	22	26	21	1.28		22.7002	2.19	5.15	3.7	100	70	5.5	5321.4	1	1	1	90	22.3167	103	0.58	0.86	241	59	166	157	27	20	18	3.2	5.9			150	81
2	54			1	1	60	90	90	0.81	0.89	185	43	105	84	0.25	54	24	21	2.71		28.5375	1.83	9.03	3.6	120	70	5.2	15352	1	1	1	88.5	26.6649	98	0.67	0.89	216	55	137	76	96	31	42	3.9	5.5			102	60
2	59			1	1	63.1	84	99	0.97	1.02	267	44	169	141	0.2	12	25	27	1.15	68.3333	26.7453	1.68	7.28	5.3	130	80	5.6	13157	1	3	2	76	24.0304	89	1.2	0.96	191	59	101	49	7	26	26		5	1.14		117	72
2	59			1	1	52.7	86	86	0.96	0.82	218	45	134	104	0.92	11	30	24	0.91		23.8978	1.02	4.48	3.5	130	80	5.7	8813.9	1	1	2	80	23.4938	90	0.6	0.91	202	43	135	165	12	21	20	4	6.1			138	80
1	48			1	1	75.9	88	95	0.79	1.17	113	38	121	53	0.48	17	28	28	0.81		25.9567	2.12	3.15	6.2	120	80	4.9	2874.3	1	3	2	89	25.3682	93	1.2	1.05	206	43	127	76	21	26	31		5.6	1.12		120	80
2	45			1	2	68	84	110	0.61	1.07	167	40	94	41	15.75	11	22	18	2		27.2392	1.84	6.06	5.1	100	80	5.3	10630	1	3	2	90	27.8379	92	1.1	0.97	183	63	90	41	13	23	17		5.8	79.58		110	70
2	43			1	1	65	81	88	0.67	0.89	175	35	93	190	1.05	11	22	17	0.87		26.3702	2.69	10.22	4.1	110	80	5.2	9530	1	1	1	77.2	25.815	86	0.72	0.87	157	30	76	294	12	21	16	3.9	5.1			110	80
1	58			3	2	55.7	79	75	0.42	1.08	184	44	80	231	0.82	29	29	23	1.83		21.4884	1.16	1.43	4.2	110	70	5.5	9855.3	3	3	1	82	19.108	81	0.39	1.03	144	44	63	116	41	29	30	3.9	5.9			100	72
2	58			1	1	59.5	84	102	0.9	0.81	180	42	100	83	0.32	10	28	25	0.82		26.339	2.23	8.29	4.1	110	60	5.8	18893	1	1	2	80	25.1969	97	0.82	0.82	211	64	114	95	12	20	17	4.8	6.5			145	84
1	48			3	1	73.8	82	106	0.69	0.99	187	58	96	48	0.1	10	25	27	1		23.4239	1.7	2.07	5	110	80	5.9	10942	1	1	1	90	22.9854	107	0.79	0.86	187	54	114	37	11	30	27	4.4	5.7			112	80
2	56			1	1	73.9	92	99	1.12	0.91	236	45	165	185	1.8	21	35	34	1.31	8.33333	30.1343	2.79	13.47	5.3	110	70	6	7633.3	1	3	1	94	29.1822	101	0.9	0.81	288	45	178	340	18	27	24		5.8	1.1		98	70
2	45			1	1	60	72	93	0.66	0.84	191	47	116	67	0.3	8	23	26	29.71		22.3081	1.83	3.85	3.6	120	80	5.7	10810	1	1	1	85	21.9674	93	1	0.74	214	48	137	65	7	17	11		5	0.55		110	70
2	46			1	2	48.6	76	86	1.23	0.82	172	48	91	115	7.03	11	23	12	0.76		23.5027	1.08	5.51	2.7	110	80	5.3	15493	1	1	2	76	23.0991	77	0.9	0.68	171	52	87	80	10	16	11		5.3	0.31		122	79
2	61			1	1	45.4	76	88	0.67	0.81	235	54	146	65	7.49	32	27	28	0.85		22.5471	2.39	7.59	3.3	130	80	5.1	15922	1	1	1	72	21.7258	78	0.56	0.77	309	67	198	134	23	20	26	3.6	4.9			110	70
2	44			1	1	56.9	79	81	1.15	0.78	171	40	98	135	0.26	10	23	17	0.74		23.6837	1.39	9.63	2.9	90	70	5.3	8280.8	1	3	1	79	22.8993	85	2.19	0.8	145	32	80	143	11	16	12	3.5	5.2			94.5	50
2	45			1	1	64.4	80	84	0.56	0.8	208	38	131	133	0.17	9	31	32	0.77	8.33333	25.3142	1.04	8.48	5.3	120	80	5.5	13219	1	3	1	80	24.4364	79	0.8	0.82	216	50	131	71	11	20	14		5.4	0.12		102	59
2	59			1	1	57.9	91	80	0.83	0.86	178	45	104	90	0.39	19	29	25	0.8	16.6667	25.6307	1.47	14.38	3.5	120	80	5.4	12596	1	1	1	90	25.91	84	0.92	0.87	189	44	119	65	20	30	25	3.8	5.8			128	80
1	57			3	1	56.3	84	92	1.41	0.98	165	49	87	50	0.95	16	23	16	2.33		23.647	0.71	0.6	3.8	110	80	5.4	8378.6	2	3	1	88	23.647	93	1.96	1.01	197	43	135	72	24	20	15	5	5.8			128	80
2	54			3	1	57.2	77	88	0.72	0.87	219	48	132	111	0.35	9	29	16	1.02		23.5647	0.9	5.06	3.2	110	70	5.2	13876	1	1	1	84	21.9557	85	0.42	0.8	209	39	109	351	13	30	25	4	6			104	60
1	63		2	3	1	57.7	85	105	0.57	1	120	26	68	64	0.27	23	27	27	2.24		21.4008	5.53	1.21	3.8	130	70	10.5	3870.9	3	1	1	87	19.8816	217	0.84	0.92	144	40	67	134	85	23	22	3	9.7			160	78
2	59			1	1	41.3	78	92	0.42	0.73	185	49	99	122	0.85	15	34	34	1.16		22.83	1.16	4.78	4	90	65	5.2	11380	1	1	2	74	21.0998	91	0.58	0.76	193	53	122	161	12	27	22	4.2	4.7			102	72
2	60			1	1	58.6	74	98	1.17	0.86	243	46	150	107	0.55	24	24	18	0.86		23.6832	1.45	6.01	4	100	70	5.9	13476	1	1	1	85	23.0174	97	1.12	0.86	223	42	151	86	22	25	24	4.5	6			90	50
2	41			1	1	58.9	75	92	1.13	0.82	173	59	82	47	0.09	12	25	22	1.24	89.2857	22.8932	1.74	4.55	4.1	120	80	5.4	10347	1	3	1	79	22.5861	98	0.85	0.83	204	52	124	58	12	26	32	5	5.8			110	80
2	62			1	1	49.2	77	88	0.89	0.72	231	44	141	116	0.38	20	30	20	4.3		22.7993	1.66	7.46	4.4	100	60	4.9	20465	1	3	1	82	22.6894	84	1.2	0.75	195	48	116	109	19	30	17		4.7	0.22		111	70
2	64			1	1	41.9	69	94	0.71	0.84	218	43	134	94	0.92	9	29	17	8.23		19.8738	1.69	2.59	3.6	130	70	5.3	17170	1	1	1	66	17.2155	85	0.8	0.85	217	44	137	116	11	23	15		5.5	1.23		110	69
2	51			1	1	51.3	71	79	1.44	0.83	207	49	126	46	0.17	9	26	22	2.5		20.3687	1.05	1.85	4.1	100	60	4.9	14119	1	1	1	69	19.7981	87	0.77	0.87	201	40	126	163	11	43	64	3.9	5.2			110	78
1	48			2	1	74	88	139	0.9	1.08	202	43	113	109	0.28	20	26	27	1.42		26.5974	3.84	4.73	5.3	110	80	6.8	3974.4	1	3	1	85	25.0098	119	2	0.83	164	58	76	62	14	25	16		6.2	0.15		126	80
2	39			1	1	54.3	73	86	0.68	0.91	182	42	103	90	0.25	10	22	16	1.48	20.8333	23.7518	1.04	7.41	4	110	60	5.4	5588.2	1	3	2	78.5	24.5515	84	1.46	0.83	236	49	146	133	12	21	13	3.6	5.7			102	60
2	43			1	1	64.9	81	99	0.53	0.89	213	40	127	118	0.17	11	19	15	2.68		27.652	2.4	12.71	3.1	120	80	5.7	10358	1	1	2	85.5	26.8944	99	0.32	0.78	209	39	148	101	12	15	12	3.1	5.7			103	60
1	57			3	2	66.1	79	87	0.84	1.06	199	30	121	149	5.8	21	22	15	1.62	12.5	24.6061	1.75	4.01	5.6	120	80	5.5	1195	2	3	1	86.7	24.5976	85	0.68	1.07	187	30	130	161	15	35	19	6.1	5.8			144	90
2	54			1	1	47.6	70	87	0.65	0.89	212	41	121	141	0.41	13	30	25	1.77		19.6349	1.22	6.55	4.3	110	70	5.3	9544.3	1	1	1	72	18.717	86	0.8	0.75	176	48	94	79	7	20	12		5.1	0.26		119	79
2	45			1	1	47.3	61	85	1.02	0.8	151	50	62	96	0.08	11	17	14	0.87		19.1406	1.28	8	3.2	130	80	5.2	12746	1	1	1	69	18.6828	86	1.6	0.67	143	64	56	37	11	15	13		4.9	0.16		121	71
2	44			1	1	44	66	81	0.89	0.8	137	43	53	154	0.06	11	19	14	0.72		18.8949	1.04	5.2	3.3	110	60	5.1	10928	1	1	2	63	18.0553	82	0.93	0.69	141	54	60	108	13	20	13	3.5	5.3			110	71
2	58			1	1	50.7	76	72	1.24	0.99	286	55	168	255	0.55	15	86	56	0.94		22.654	0.66	2.76	2.8	100	80	5.3	22036	1	1	1	69	20.2422	87	1	0.72	192	50	110	92	19	35	26		5.8	8.81		100	70
2	61			1	2	44.3	78	80	0.65	0.82	171	35	91	194	0.2	18	22	17	1.02		20.252	1.2	5.58	4.4	120	70	5.2	13842	1	1	2	68	19.6018	88	0.9	0.72	152	40	81	128	14	20	15		4.7	0.22		118	68
1	52			3	1	72.6	93	121	1.23	0.94	181	20	40	524	1.93	1403	182	116	0.94	118.571	24.6548	3.67	2.13	7	110	80	5.5	5194.9	3	3	1	95	24.9749	113	1.8	1.38	165	16	69	227	617	121	73	8.2	5.2			130	80
2	53		2	1	1	62.8	86	155	0.63	1.07	265	57	161	119	5.59	23	29	32	4.05		29.3007	6.32	36.96	5.6	130	70	7.7	7858.4	1	1	2	93	28.814	129	0.6	0.98	209	61	113	105	24	23	22		7.1	10.13		138	90
1	43			1	2	71	81	84	0.57	0.9	140	31	81	102	4.54	13	22	17	0.8		27.6307	1.28	4.74	3.7	100	60	4.8	13579	1	1	2	89	27.3241	80	1.1	0.9	132	33	70	107	14	20	20		4.8	1.8		110	80
2	50			1	2	59.7	78	87	0.7	0.77	210	45	125	142	0.35	8	19	15	0.87		24.5316	1.05	8.22	3.8	100	70	5.4	7977.4	1	1	2	74	23.6837	82	0.7	0.73	174	54	88	113	10	18	20		5.1	0.39		101	62
2	48			1	2	41.3	65	88	0.81	0.81	182	41	101	167	0.1	6	19	18	0.77		19.0088	1.09	2.33	3.1	100	70	5.2	11672	1	1	1	70	17.8629	78	0.9	0.83	155	46	77	106	4	15	14		5	0.1		88	58
2	44			1	1	63.2	77	79	0.63	0.73	178	45	103	58	0.09	7	23	20	1.3	16.6667	26.8926	1.25	10.88	2.7	120	80	5.4	9140.9	1	3	1	83	26.4751	83	0.6	0.63	185	56	108	45	5	20	17		5.3	0.52		121	69
1	49			3	1	63.2	80	87	0.8	1.12	150	28	89	153	2.52	39	30	41	0.99		23.214	1.46	3.9	5.2	110	60	5.6	9372.6	3	1	2	83	23.9096	86	0.7	1.04	144	27	86	188	32	26	28		5.6	0.88		119	80
2	42			1	2	66	81	87	0.52	0.77	147	32	80	157	0.21	10	15	9	0.8		28.5665	1.52	8.66	4.2	120	70	5.1	10429	1	1	1	83	27.7709	92	0.8	0.71	131	41	64	41	9	14	8		4.9	0.74		110	70
2	60			1	1	55.3	76	84	0.67	0.8	153	39	90	74	0.65	7	22	15	1.17		24.35	1.24	8.18	3.2	100	70	5.2	17144	1	1	1	77	23.3511	81	0.8	0.72	131	37	67	90	7	15	7		4.8	0.19		136	85
2	68			1	1	55.6	88	91	0.55	0.61	175	39	111	49	0.6	20	21	16	2.97		26.5178	1.41	5.09	3.3	120	80	5.3	17328	1	1	2	94	27.7289	134	0.6	0.8	223	59	128	76	29	26	22		5.2	0.67		129	90
2	57			1	1	50.6	72	92	0.73	0.94	232	56	136	74	0.11	10	21	21	2.5		20.9801	1.41	4.3	3	120	80	6.7	14871	1	1	1	70	19.4797	119	1	0.86	239	74	131	61	9	19	12		6.3	0.06		101	62
1	45			3	1	59.6	79	89	0.63	1.08	214	51	124	103	1.53	13	24	16	1.25		21.2939	1.25	1.2	5.5	130	80	5.3	6015.9	3	3	1	77	19.6504	90	1	0.81	169	44	100	80	11	19	16		5.2	1.33		110	70
2	40			1	2	55.2	74	83	0.77	0.82	198	58	101	108	0.24	15	19	14	0.98		22.8874	1.45	5.05	4.7	110	70	5.1	6510.4	1	1	2	78	21.159	88	0.7	0.72	172	61	82	101	21	16	12		4.8	0.26		120	70
2	65			1	1	63.2	96	71	0.71	0.89	192	52	103	84	6.6	14	25	28	0.76		26.3399	1.65	13.62	4.4	130	80	5.7	11891	1	1	2	92	26.0494	81	0.6	0.86	176	54	89	109	12	22	23		5.5	1.15		108	70
2	44			1	2	58.3	78	89	0.75	0.88	162	63	66	74	0.4	10	22	16	1.48	75.8333	24.1727	1.23	6.22	5.2	130	70	5.5	9362	1	3	2	85	26.3552	100	0.8	0.7	173	68	76	93	12	19	14		5.3	0.2		119	82
2	49			1	1	63.5	84	82	1.39	0.92	132	38	68	48	2.18	13	19	19	0.74		28.4494	1.41	11.82	6.6	110	70	5.4	16078	1	1	1	82	25.4243	89	1.95	1.03	159	40	96	101	11	20	15	7	5.2			104	60
2	42			1	2	56.8	75	87	1.3	0.7	189	64	93	68	0.09	11	19	18	0.93		24.075	1.46	8.04	3.2	100	70	5.4	10047	1	1	1	83	24.7854	89	2.1	0.66	184	62	98	89	10	21	19		5.3	0.42		142	95
2	50			1	2	61.8	79	88	0.87	0.79	180	39	103	97	8.35	49	19	17	3.08		23.2032	1.43	5.4	2.2	130	80	5.4	7356.2	1	1	2	77	23.1767	86	1	0.77	171	45	101	66	45	22	25		5.2	0.56		110	69
2	43			1	2	60.2	73	88	0.94	0.76	159	42	88	44	0.9	12	19	16	0.78	6.66667	24.454	1.77	5.85	3.3	110	70	5.3	8681.8	1	1	2	82.5	24.0077	92	0.86	0.84	184	40	114	101	12	19	17	3.1	5.4			110	60
2	66			1	1	50.3	80	88	0.58	0.8	276	43	177	225	0.92	38	28	29	1.09		22.9638	1.73	11.07	3.6	100	70	5.9	9586.8	1	1	2	86	24.4499	88	0.9	0.85	283	48	182	144	51	36	31		6	0.65		120	69
1	46			3	1	68.9	86	100	0.85	1.07	239	38	147	224	1.31	20	32	42	1.7		25.7112	3.54	5.52	5.8	110	70	5.8	2797.8	2	1	1	92	25.7373	98	0.8	1.09	224	41	149	152	20	30	59	5.8	5.9			90	60
1	52			1	1	59.3	78	166	1.34	1.17	216	37	141	120	0.26	15	21	17	0.97	125	21.5458	18.36	1.53	5.9	110	80	5.4	3540.2	1	3	1	78	20.7351	79	1.5	1.07	189	38	106	168	19	31	34		5.4	0.49		106	60
1	66			3	1	62.4	90	86	0.6	1.09	250	41	150	197	0.35	33	31	24	1.89	39.1667	26.0738	2.02			110	60	5	7601.1	3	2	1	88	25.974	81	0.7	1.01	205	40	114	138	18	25	24		4.8	1.17		100	60
2	54			1	2	62.4	83	90	0.85	0.84	213	48	128	65	5.09	10	19	13	1.79		26.2772	1.77	18.92	3.6	129	63	5.5	11384	1	1	2	86	25.3939	90	0.7	0.88	224	47	138	104	14	22	16		5.9	6.32		128	59
2	47			1	1	54.4	74	87	0.65	0.9	184	41	109	83	0.29	12	25	17	0.82		22.2965	2.53	6.51	3.5	110	70	5.1	7140.8	1	1	1	71.2	21.1884	82	0.31	0.89	176	32	110	124	12	20	14	3.7	5.5			108	60
1	58		2	3	1	70.1	90	119	0.42	0.95	156	30	74	250	0.72	20	31	30	19.23		27.1786	2.45	2	6.6	120	80	7	6999.3	3	1	2	87	26.8859	121	0.5	0.9	176	28	89	279	27	21	16		7	0.74		128	82
1	46			3	1	67	89	87	0.59	1.02	194	33	113	140	0.5	16	24	24	0.79		23.238	1.98	1.61	5.8	110	70	5.9	6885.7	3	1	1	88	23.0419	87	1	1.02	198	36	123	117	21	21	30		5.5	0.72		110	70
2	65			1	1	67.6	90	93	0.93	0.89	281	66	165	119	1.11	50	58	48	0.82		26.5388	3.14	17.23	4.6	110	70	5.6	9613.7	1	1	1	86	24.2161	96	1.1	0.87	169	59	80	97	36	30	22		5.5	0.45		112	74
2	45			1	1	60.8	86	118	0.65	0.82	141	36	75	74	0.01	8	22	23	5.76	33	25.1122	3.58	4.04	3.7	120	80	6.1	4196.6	1	3	1	89	24.9014	102	0.5	0.76	125	35	68	66	16	25	42		6.4	1.18		120	69
1	50			3	1	71.7	79	91	1.16	1.01	176	42	95	92	0.34	24	30	27	0.78	125	21.9585	1.39	1.12	5.9	110	80	5.5	6567.4	1	3	1	84	22.4589	98	1.01	1	168	42	96	137	27	22	24	6.1	5.7			112	78
2	47			1	1	47.4	66	88	0.46	0.77	192	53	103	65	0.13	9	25	17	0.75		20.9269	2.5	6.7	2.2	100	70	5.3	12139	1	1	1	70	20.0088	80	1.6	0.69	183	57	99	52	8	21	13		5.7	6.52		108	62
2	44			1	2	55.1	69	89	0.88	0.79	178	50	93	69	0.54	10	23	18	1.33		22.2404	1.79	4.96	3.6	110	70	5.3	9780.4	1	1	1	75	22.0997	91	0.9	0.72	177	54	98	71	14	16	13		4.9	0.18		100	70
2	58			1	1	63.3	89	87	0.85	0.84	213	37	121	228	1.56	13	28	19	1.3		27.6154	1.71	6.51	4.1	110	70	5.6	6452.8	1	1	1	83	24.9755	96	0.9	0.77	226	43	132	298	20	24	19		5.9	0.66		100	70
1	57			2	1	63.9	89	97	1.07	1.19	211	41	132	60	1.26	28	28	35	1.06		23.8745	2.09	2.66	5.7	110	80	5.7	7846.6	1	1	1	88	24.6911	86	1.1	1.08	192	38	112	128	21	21	30		5.2	0.37		112	72
2	49			1	2	57.8	74	88	1.08	0.84	240	81	116	94	0.18	10	29	17	7.98		21.6748	1.96	4.1	4.1	110	70	4.9	14936	1	1	2	79	22.4898	83	0.9	0.76	159	60	84	49	11	25	14		5.4	0.12		112	74
1	62		2	2	1	71.1	91	154	1.23	0.99	185	28	125	94	0.19	18	24	35	2.89		25.3722	2.05	1.27	5.1	110	80	7.8	2684.6	1	1	1	94	25.6681	146	0.7	0.79	179	30	109	178	18	22	35		8.4	0.19		111	68
2	42			1	2	62.6	81	86	0.65	0.91	227	57	125	104	0.83	13	20	20	0.74	5	25.5591	1.94	8.34	3.9	100	60	5.2	8722.8	1	3	1	83	25.7672	95	0.6	0.85	198	55	108	114	11	16	14		5.5	1.37		109	72
2	46			1	2	72.4	91	105	0.79	0.85	202	34	111	266	1.61	21	42	56	3.66		30.0964	3.46	8.74	4.2	120	80	5.7	6008.7	1	1	1	91	27.3324	100	0.57	0.81	183	33	100	225	12	17	18	4.2	5.7			138	99
2	57			1	1	65.2	84	88	0.86	0.88	232	48	145	66	0.73	12	30	23	1.41		27.9621	2.3	10.43	3.5	110	80	5.3	24157	1	1	1	81	25.7531	79	0.8	0.92	224	46	137	152	10	25	18		5	0.3		101	61
2	45			1	2	67.3	87	89	0.85	0.85	200	43	124	92	0.31	10	28	31	0.8		26.6208	2.14	8.76	3.9	120	80	5.2	7955.8	1	1	2	85	25.582	85	0.7	0.8	174	46	98	127	13	22	24		4.8	0.25		118	70
2	41			1	1	60.5	77	87	1.22	0.95	174	45	96	76	1.14	7	25	19	1.36		24.5759	1.88	5.85	4.1	130	70	5	10677	1	1	1	77	23.6081	98	0.9	0.97	161	48	86	101	7	15	14		4.9	0.4		110	70
2	47			1	1	53.2	70	85	0.96	0.94	227	64	123	68	0.69	11	26	16	2.74		24.0921	1.9	13.47	4.8	120	80	5.8	7955.4	1	1	1	86	25.2241	86	0.5	0.95	223	52	123	188	14	20	13	5.2	6			118	78
1	49			1	2	83.3	99	87	0.91	1.08	174	27	100	230	0.36	13	26	24	0.78		29.339	2.72			120	70	5.7	5448.7	1	1	1	94	27.2139	90	1.2	0.97	199	45	127	93	11	27	26		5.4	0.25		106	69
2	47			1	1	50.3	71	90	1.02	0.77	225	58	135	66	0.05	8	22	15	1.57		20.2514	1.79	2.2	2.4	130	70	5.7	9599.8	1	1	1	72	20.1011	83	1	0.6	214	51	124	119	9	21	15		5.5	0.05		119	69
2	59			1	1	62.9	84	94	1.06	0.99	223	41	132	219	0.78	14	26	21	3.82		27.4409	1.41	10.36	3	120	80	5.3	4672.1	1	1	1	84	26.5162	90	1.13	0.96	199	42	103	329	13	20	14	3.6	5.3			142	90
2	42			1	1	76.7	88	89	0.62	0.81	248	35	150	307	1.51	13	20	15	1.56		29.2618	2.5	17.89	4.4	100	60	5.8	8916.3	1	1	2	91	28.7962	93	0.5	0.69	200	43	120	126	11	21	12		5.4	4.72		110	70
2	52			1	2	47	66	89	0.99	0.77	207	44	121	115	0.39	9	22	12	1.02		19.4374	1.53	3.89	2.9	130	70	5.4	10751	1	1	2	69	18.7262	97	1.4	0.69	203	55	116	47	11	23	13		5.1	0.28		130	82
1	46			1	2	63.6	78	92	0.66	1.05	203	53	113	86	1.09	7	26	21	0.79		22.8594	1.29	1.36	4.7	110	70	5.8	8881	1	1	2	84	22.4008	87	0.8	0.98	249	68	138	100	7	19	12		5.6	0.61		119	78
2	47			1	2	45.2	65	81	0.78	0.8	259	57	160	96	0.38	18	25	21	0.76		20.1426	1.2	3.68	3.8	130	70	5.5	14169	1	1	2	66	19.6233	85	1	0.74	218	59	126	92	12	17	12		5.3	0.33		115	82
2	50			1	2	65.1	86	102	0.89	0.98	256	54	150	123	1.05	17	26	22	1.11	20.5	29.4414	2.4	12.56	5.9	120	80	5.3	7915.7	1	1	1	88	27.5953	100	0.9	0.93	238	58	144	94	13	20	18		5.1	0.39		110	70
1	55			2	1	71.8	94	89	0.61	1.11	166	33	101	69	4.51	44	35	41	0.82	53.5714	25.5914	1.38	2.78	4.1	110	70	5.3	7026.6	1	3	1	96	23.9018	88	0.74	1.04	164	34	95	184	42	26	29	5.8	5.6			100	60
2	44			2	1	52.7	74	87	0.56	0.81	138	35	77	61	0.16	13	19	13	1.88		23.3599	2.53	4.12	3.8	120	80	5.1	5546	1	3	1	77	23.9732	85	0.6	0.73	130	37	72	62	11	15	16		5	0.87		110	67
1	58		2	3	2	81.4	98	168	1.04	1.11	218	32	150	98	13.84	38	38	33	3.07	12.5	27.4191	6.64	5.65	5.9	130	80	9.1	7618.4	3	2	2	104	28.1855	117	0.9	1.02	177	31	114	109	21	24	21		9.1	1.73		111	72
2	48			1	2	44.3	69	93	0.69	0.88	224	42	140	127	0.74	18	30	26	2.71		18.728	1.85	6.69	3.6	110	80	5.2	7875.6	1	1	1	70	19.3436	87	0.8	0.7	237	42	158	132	12	20	13		4.6	0.27		98	63
1	68			2	2	61.2	73	78	1.15	0.92	143	31	73	68	0.17	16	26	21	0.68		20.7834	0.85	0.82	5.9	110	80	5.4	12267	1	1	1	75	20.4099	83	0.9	0.78	144	48	72	37	14	24	17		5.4	0.7		101	67
2	58			1	1	61.9	89	90	0.97	0.9	196	58	121	74	0.62	8	21	19	0.31		28.3362	1.7	11.55	3.3	120	80	5.1	15008	1	1	1	91	27.2464	91	0.68	0.83	177	47	106	50	11	18	16	3.8	5.4			130	80
1	64			3	2	71.6	88	94	0.91	1.14	156	44	88	119	0.21	13	22	19	0.39		24.63	1.73	2.39	5.1	130	80	5.1	17310	2	1	1	91	24.9016	96	1.7	1.03	186	45	103	105	10	17	16		5.6	0.19		122	70
2	51			1	2	63.5	78	88	0.95	0.83	136	46	77	51	0.39	7	31	18	0.4		25.8935	1.15	11.56	3.1	110	80	5	4681	1	1	2	90	26.4912	84	0.9	0.76	158	49	82	65	12	29	21		5.5	0.27		120	70
2	48			1	2	62.7	75	87	0.83	0.94	165	48	93	129	0.3	9	23	16	0.31		24.8637	0.97	9.61	3.7	80	40	5.2	15510	1	1	1	84	24.7902	85	1.1	0.84	157	49	78	82	10	20	9		4.9	0.22		107	67
1	49			1	1	70.7	84	80	0.81	1.1	178	51	108	47	0.47	24	26	29	0.22	152.143	23.9816	1.13	1.97	4.7	110	70	5.3	8774	1	3	2	90	24.2191	84	1.1	1.03	210	48	121	66	30	26	27		5.4	0.5		110	80
2	44			1	1	52.2	76	81	0.95	0.83	224	59	135	123	0.35	10	20	15	0.54		24.3218	1.02	5.98	3.3	110	70	5.1	10009	1	1	1	84	24.796	78	1	0.76	215	49	116	163	11	19	13		5.2	0.29		110	79
2	47			1	1	63.5	76	93	0.84	0.95	182	37	117	110	0.24	12	19	15	0.23		25.8275	2.5	12.3	3	120	70	5.6	8120	1	3	1	88	24.8737	94	0.8	0.79	149	35	81	89	10	21	20		5.8	0.93		110	70
1	55			2	2	50.2	80	88	1.07	1.09	156	57	76	81	0.25	14	30	17	0.27		18.4837	0.98	1.12	6.5	110	70	4.8	14592	1	1	2	76	18.2111	80	1	1.04	165	58	87	73	30	18	8		5.1	0.22		120	79
1	50			1	1	73.5	88	98	1.22	1.14	204	40	129	152	2.57	16	24	21	0.51	23	26.2287	1.59	2.09	6.4	110	70	5.4	6248	1	3	1	95	25.9516	97	0.96	1.16	238	42	157	187	28	27	34	6.5	5.6			109	79
2	52			1	2	48.8	71	89	0.85	0.8	124	36	69	73	0.99	8	23	18	0.28		20.1299	1.99	3.75	4	90	60	4.9	16003	1	1	2	75	21.2147	83	0.8	0.75	155	37	85	130	10	23	15		4.7	0.1		92	66
2	48			1	1	47.6	70	78	1.14	0.92	199	42	135	99	0.33	7	22	18	0.88		21.6726	1.19	4.5	3.9	110	70	5.1	14297	1	1	1	80	21.132	78	1.2	0.79	167	35	110	70	11	23	17		5.4	0.59		142	89
1	59			3	1	54.5	86	80	0.49	0.87	145	39	84	70	2.08	7	33	25	0.29		22.5391	0.54	0.84	4.9	110	70	5.6	6801	1	1	1	80	21.7007	77	0.42	0.86	124	32	73	38	12	29	22	5.4	6			98	60
1	51			1	1	65	77	93	0.88	0.95	204	43	130	153	0.35	9	33	28	0.49	8.33333	24.0205	0.77	1.35	3.9	110	80	5	10384	1	3	1	88	25.1123	81	0.84	0.9	204	38	124	233	11	30	34	4.5	5.5			130	94
1	61			1	2	47.1	69	90	0.74	0.82	131	40	66	75	2.96	8	22	14	0.34		17.8807	0.63	0.84	4.1	110	70	5.6	14456	1	1	2	67	17.3134	85	0.9	0.72	122	46	55	58	10	17	8		5.4	3.09		105	65
2	52			1	1	43.7	64	96	1.03	0.76	210	53	135	73	0.13	10	29	25	0.69		16.734	1	3.11	3.2	110	80	5.7	13281	1	1	1	65.3	15.6816	94	0.99	0.65	188	48	118	102	11	24	19	3	5.9			113	70
1	68			1	2	60.4	84	82	0.82	0.9	190	43	117	181	1.77	9	33	39	0.52		24.7874	0.44	1.24	6.5	110	70	5.6	5672	1	1	1	88	24.8559	84	0.82	0.86	180	39	109	212	27	29	33	6.1	5.9			124	80
2	53			1	1	51.9	74	96	1.08	0.77	200	60	127	45	0.31	11	31	22	0.45		20.8163	1.14	1.47	3.2	110	70	5.1	12636	1	1	1	82	21.6416	80	1	0.75	198	52	122	47	12	28	17		5.3	2.27		100	70
1	64			2	2	71.6	86	92	0.83	1.39	220	54	148	96	1.42	38	26	37	0.86		25.0099	1.92	5.83	4.2	130	80	5.2	11555	1	3	2	96	25.2447	82	1	1.12	124	31	45	276	24	21	19		4.7	1.7		150	90
2	62			1	1	56.7	90	94	1.05	0.8	194	47	123	92	16.21	19	30	27	0.41		22.6553	1.16	4.43	3.9	110	80	6.2	9112	1	1	1	76	21.809	91	0.9	0.69	171	42	92	110	13	20	12		6.1	2.66		113	78
1	60			2	1	63.1	79	90	0.79	1.15	174	49	109	46	5.64	13	32	17	0.24		22.5713	1.09	1.45	5.7	120	80	5.3	8231	1	1	1	90	22.7502	94	0.7	1.1	188	35	114	108	10	21	23		5.5	0.69		118	67
2	66			1	2	63.8	82	107	0.87	0.84	245	47	162	233	1.13	22	26	19	0.45		25.047	2.72	5.87	5.2	110	80	6.1	6016	1	1	2	84	25.4934	96	0.61	0.74	204	38	129	217	17	20	16	5.5	6.1			128	80
2	50			1	1	46.2	66	97	0.36	0.95	167	65	83	50	2.09	22	29	20	0.34	5	20.1553	1.79	3.79	3.2	110	80	5.9	19666	1	1	1	73.5	19.8939	85	0.26	0.84	183	45	115	72	20	25	24	3.1	5.8			100	60
2	41			1	1	53.7	68	86	1.47	0.79	175	55	100	78	0.8	26	28	18	0.72		21.8137	1.4	3.87	3.3	130	80	5.1	14522	1	1	1	77	23.2022	85	1.38	0.76	162	49	86	108	25	22	16	3.2	5.3			110	62
1	47			2	2	72	90	85	0.66	1.08	217	38	138	236	2.43	35	33	47	0.94		26.6721	1.65	2.5	7	110	80	5.8	5272	1	1	2	90	25.3941	82	0.6	1.01	196	32	82	358	25	28	36		5.7	0.72		110	80
2	66			1	1	51.5	75	93	1.26	0.73	168	49	93	86	5.25	11	23	15	0.31		21.4084	1.62	3.26	2.8	130	70	5.5	11158	1	1	1	74	19.4711	78	1.3	0.74	136	39	73	66	9	24	17		5	0.12		100	71
2	62			1	1	55.4	84	85	0.55	0.88	174	40	115	93	0.96	39	60	53	0.52		24.2972	1.59	11.65	4.6	110	70	5	13412	1	1	1	89.5	24.6142	95	0.54	0.9	176	32	107	135	50	39	24	4.2	5.5			110	70
1	52			3	1	63	78	86	1.1	1.09	153	51	77	109	0.34	13	32	25	0.91	33.3333	21.7226	0.96	1.22	4.5	100	60	5.4	6028	3	1	1	86	21.7925	73	1.1	1.02	129	38	64	61	13	34	33		5.1	1.49		110	70
2	60			1	1	46.4	72	81	1.02	0.8	187	56	107	93	0.15	12	26	22	0.26		22.8501	1.02	3.22	3.5	110	80	5.4	11104	1	1	1	77.2	23.8821	80	0.85	0.77	196	46	118	95	11	21	19	3.9	5.7			120	70
2	46			1	1	58.4	75	78	0.66	0.77	192	51	120	90	0.44	9	25	19	0.22	35.7143	24.3394	1	6.88	2.9	110	80	5.5	12705	1	3	1	82	21.8293	89	0.64	0.74	174	40	120	72	14	19	14	3.2	5.6			110	80
1	66			3	1	60.4	82	86	0.87	1.16	244	62	158	69	1.49	58	37	32	11.8		22.7054	1.04	1.03	6.5	130	70	5.7	8734	3	1	1	85.2	23.0708	80	0.57	1.16	195	51	120	129	41	23	20	7.8	5.9			150	90
2	63			1	1	59.1	92	80	0.66	0.82	212	56	133	89	0.62	21	29	19	0.33		24.3474	0.91	5.07	3.3	120	70	5.5	13853	1	1	1	92	24.563	91	0.66	0.8	217	56	135	115	22	20	16	4.1	5.7			127	80
2	54			1	1	48.5	79	73	1.12	0.85	195	43	126	94	6.05	23	34	51	0.76		24.1207	0.89	4.75	4.3	120	70	5.7	2842	1	1	1	87	25.0656	90	1.1	0.79	151	30	64	274	18	40	63		5.5	1.71		132	80
1	56			2	2	66.4	82	85	1.41	1.07	190	39	114	202	0.28	24	36	33	0.49	125	24.1546	1.36	3.4	5.7	110	80	5	5840	2	3	2	83	22.845	85	2.2	0.91	208	38	126	152	18	28	20		5	0.45		106	62
2	67			1	1	41.7	64	89	0.98	0.86	190	47	122	95	0.8	11	34	20	1		16.3503	1.77	2.19	2.5	100	70	5.5	13497	1	1	1	67	16.0156	98	0.4	0.88	237	47	175	147	12	26	14	3.4	5.6			110	80
2	51			1	1	64.5	76	77	1.08	0.86	183	53	109	63	0.81	11	26	18	0.49	65.9524	26.1008	1.44	3.88	3.9	100	70	5.7	9471	1	3	1	87	26.1122	82	0.9	0.72	243	49	161	146	11	22	18		5.5	0.22		110	70
2	52			1	2	44.9	64	75	0.78	0.95	155	44	93	50	0.63	10	22	16	2.42		19.1057	0.93	1.64	4.4	110	80	5	10798	1	3	2	65	18.5468	85	0.5	0.8	146	42	85	57	12	19	15		4.6	10.54		118	78
2	44			1	2	59.9	74	76	0.61	0.82	163	58	83	64	1.99	18	34	42	0.93		23.5749	1.07	9.33	5.6	110	70	5.2	7001	1	1	2	85	24.4101	76	0.5	0.68	152	60	77	28	11	24	32		4.8	1.59		104	60
2	54			1	2	56.8	78	87	0.68	1.07	186	39	102	199	1.72	34	32	34	0.28	55	25.0437	1.5	13.07	5.3	130	80	5.3	9878	1	3	2	83	24.8121	88	0.7	0.99	213	38	113	280	66	24	29		5.8	1		118	70
1	60			2	1	68.4	89	80	1.02	0.99	213	40	135	177	1.21	23	32	20	0.41		24.9724	0.66	2.98	5.9	110	80	5.3	7403	1	3	2	89	24.8198	94	1	0.89	196	39	106	275	76	21	20		5.3	0.77		120	70
2	64	3		1	1	59.4	90	85	0.67	0.92	226	45	157	153	1.65	17	26	20	0.71		28.4086	1.57	11.29	4.9	130	70	5.4	8776	1	1	1	97.5	29.63	89	0.55	0.74	250	47	194	165	27	39	49	3.5	5.6			128	88
2	51			1	1	56.5	73	83	0.81	0.87	187	37	127	122	0.39	10	29	24	0.37		23.9478	1.29	7.65	4.1	110	70	5.4	14483	1	3	1	78	22.7819	90	0.5	0.73	183	44	118	71	6	20	16		5.3	0.15		104	72
1	61			1	1	74.7	88	90	1.04	1.25	186	44	124	82	0.21	22	30	37	2.22		26.7848	1.03	2.41	4	100	60	5.5	4949	1	1	2	95.2	26.7898	91	0.84	1.04	165	36	114	102	20	18	21	3.6	5.9			110	70
2	56			1	1	50.4	77	74	0.36	1.14	162	56	89	56	0.09	9	22	18	0.63		21.2791	0.93	10.4	4.6	100	60	5.2	17095	1	1	1	82.4	21.3213	73	0.5	1.07	173	52	107	66	11	20	13	4	5			120	70
2	66			1	2	56.3	80	105	0.65	0.78	199	52	122	120	1.25	24	29	28	0.53		25.0222	3.03	14.67	3.9	90	70	6.3	7242	1	1	1	83	23.8463	98	0.8	0.74	169	43	92	134	14	19	16		6	0.73		110	70
2	60			1	1	54.7	69	85	0.75	0.97	243	74	156	67	0.09	20	28	20	0.4		22.8859	1.2	7.5	4.1	110	70	5.3	14985	1	1	2	79	23.54	80	0.6	0.9	231	65	148	74	28	28	23		4.8	0.15		120	68
2	48			1	1	52.5	67	84	0.64	0.96	201	74	110	65	0.08	10	26	18	0.35	58.5	18.4471	0.79	3.35	3.4	120	70	5	22360	1	2	1	76	19.6309	85	0.73	0.92	202	53	113	116	13	23	17	3.4	5.3			120	80
2	40			1	2	52.8	65	76	0.65	0.8	156	66	75	49	0.39	65	42	40	0.49	42.8571	22.526	0.88			110	70	4.8	17089	1	3	1	76	24.3713	89	1.3	0.69	144	55	66	71	26	24	20		4.7	0.29		131	90
2	43			1	1	56.2	76	92	0.81	0.88	186	62	108	58	0.15	12	26	18	0.33	34.3333	23.8207	1.76	5.33	3.2	100	60	5.5	15783	1	3	1	78	24.097	95	0.63	0.8	202	40	132	88	13	22	17	4.1	5.4			96	60
1	63			1	1	62.5	87	92	0.71	1.35	217	61	140	63	2.18	51	30	20	1	150	24.1417	1.12	4.01	9	110	70	5.5	12386	1	3	1	89	23.5038	91	0.7	1.14	220	65	115	185	135	30	20		5.1	1.07		148	90
1	41			2	1	87.5	94	93	1.1	1.1	182	50	113	42	1.07	17	26	24	0.28		27.7723	1.69	4.18	5.6	120	80	5.2	8258	1	1	1	91	26.4559	85	1.01	1.02	157	39	88	134	14	24	30	5.4	5.4			102	70
2	51			2	2	56.2	79	82	0.68	0.92	199	52	133	47	0.39	8	34	27	0.37	16.6667	25.2802	1.17	3.89	5	90	50	5.4	10513	1	3	2	81	24.653	88	0.8	0.75	184	48	111	77	5	34	34		5.5	0.28		110	60
2	41			1	2	60.2	77	82	0.59	0.87	186	51	117	71	0.46	8	19	14	1.57	30.8333	24.0538	1.09	5.85	4.3	100	60	5.1	12753	1	3	1	87	25.0936	88	0.9	0.76	227	54	146	74	10	17	18	4	5.5			100	60
2	69			1	1	47.5	82	80	0.82	0.9	145	32	80	199	0.74	9	34	26	0.72		22.561	0.97	7.23	4.4	110	80	5.6	16740	1	1	1	87.2	23.1319	83	0.88	0.86	156	28	98	202	13	20	16	3.8	6			130	68
2	55			1	1	67.9	89	83	1.21	0.85	174	59	93	84	1.19	17	21	17	1.09	8.33333	32.0733	1.07	7.83	3.9	110	60	5.3	16184	1	3	1	96	32.4267	84	0.9	0.76	186	51	105	139	19	19	21		4.9	0.35		120	70
2	51	4	4	1	1	67.1	89	89	0.61	0.79	267	51	176	283	1.8	76	40	44	1.77	6.66667	26.2109	1.27	9.01	4.5	110	60	5.8	8700	1	3	1	95	26.4393	101	0.5	0.67	300	70	202	125	134	28	55		5.9	0.48		126	80
2	42			1	1	79	92	81	0.89	0.87	149	70	60	55	1.05	11	24	24	0.57		30.5151	1.63	13.72	4.5	100	50	5.4	11558	1	1	1	83.7	26.6138	84	0.85	0.82	141	68	52	74	7	20	18	3.8	4.8			110	80
2	46			1	1	48.6	63	87	0.75	0.9	173	53	101	70	0.17	8	27	19	0.55	35.7143	19.6917	1.31	2.81	3.8	100	70	5.5	14530	1	3	1	76	19.5638	88	0.4	0.78	168	49	93	116	12	24	18		5.2	0.14		131	80
1	56			2	1	63.2	79	94	1.26	1.23	308	57	220	59	0.48	14	17	16	0.49		20.9468	1.14	1.1	6.6	110	80	5.3	17421	1	3	2	82	21.9742	86	1.5	1.04	261	59	176	67	20	23	18		4.8	3.7		99	72
2	51			1	1	61.1	83	96	0.91	0.94	195	52	118	79	0.61	14	27	29	1.05		26.6557	2.75	14.05	4.7	110	70	5.6	9264	1	1	2	87	28.4425	97	0.9	0.89	202	50	112	168	18	39	57		5.6	0.93		102	66
2	61	4	4	1	1	64.3	86	122	0.83	0.82	257	36	182	208	1.08	24	20	17	0.4		26.833	1.89	3.84	3.4	120	80	7.3	11136	1	1	1	95	27.5963	106	0.7	0.67	251	39	134	402	30	18	17		6.5	1.59		122	79
1	54			1	1	74	90	101	1.01	1.16	195	42	123	108	14.42	21	26	25	1.68		25.6055	1.86	4	5.3	120	80	6.1	5610	1	1	2	92	25.796	199	0.9	1.07	218	43	133	195	38	34	44		8.4	1.13		130	90
1	58			3	1	50.1	74	88	0.84	0.98	122	45	57	59	0.47	37	31	22	1.51	125	17.9856	1.02	0.94	6	100	60	5.9	10709	3	3	1	76	18.1879	88	0.8	0.97	174	48	94	128	45	30	22		5.1	0.41		91	70
1	49			3	2	63.9	86	91	0.93	1.01	226	64	142	55	4.06	17	24	16	0.35		22.0847	0.95	0.94	4.8	120	80	5.4	7304	3	1	1	78.1	21.6445	91	0.91	0.97	186	60	96	59	12	18	12	4.6	5.7			110	71
1	62			2	1	66.7	90	91	0.63	1.03	177	31	91	356	0.48	23	31	34	0.41		27.2331	1.88	2.27	4.1	120	70	5.5	12694	1	1	1	93	28.0547	93	0.63	0.99	173	31	114	150	19	20	21	4.4	6.2			112	70
2	50			1	1	50.4	68	89	1.42	0.92	231	67	133	126	0.59	14	28	18	0.59		22.281	1.01	5.13	5.1	120	70	5.2	14171	1	1	1	69.5	21.868	94	1.23	0.91	231	54	151	102	14	31	22	4.9	5.7			106	70
1	53			3	2	76.3	95	106	0.91	1.06	198	27	133	204	1.17	26	20	16	0.43		27.7225	1.54	1.73	3	110	80	5.6	13835	3	1	2	95	26.8141	110	0.52	1.02	183	28	127	137	17	15	14	3.4	6			120	76
2	40			1	2	70.4	88	98	1.28	0.88	155	34	100	106	0.14	10	24	20	0.92		27.363	1.81	13.45	4.6	120	80	5	10906	1	1	1	93	28.516	97	1.12	0.82	157	30	101	106	12	17	15	3.6	5.2			120	80
2	47			1	2	63	78	85	0.54	0.79	159	53	81	76	0.33	11	24	16	0.36		22.2155	1.77	3.24	1.7	100	60	4.9	13887	1	1	2	78	22.5132	80	0.9	0.77	192	58	104	68	12	17	12		5	0.27		102	72
1	44			3	1	73.9	87	204	0.69	1.12	190	46	113	136	1	21	27	18	2.46	145.833	24.1031	2.18	1.56	4.6	120	80	9.7	3038	3	2	1	98	26.0216	233	0.62	1.03	213	34	109	468	55	37	44	3.6	9.6			120	80
2	66			1	1	53.6	82	83	0.54	0.94	226	56	144	108	1.49	13	28	22	0.4		21.8565	1.77	12.56	4.6	100	60	5.3	13127	1	1	1	84	22.6667	94	0.56	0.87	221	54	144	89	15	24	18	4.4	5.7			110	70
2	48			1	1	54.6	76	85	0.58	0.95	204	49	126	156	0.38	12	23	18	0.49		21.8992	0.91	4.56	4.2	110	70	5.7	4247	1	3	1	75	21.2306	90	0.51	0.92	237	45	146	216	33	24	22	5.1	5.8			101	61
2	45			1	1	66.6	92	79	0.88	0.91	253	61	161	129	0.78	16	23	18	0.47		25.5346	1.02	14.48	4.7	130	80	4.7	11712	1	1	1	94	25.4127	88	0.8	0.8	253	66	150	158	13	20	16		4.9	0.72		110	60
2	63			1	1	51.3	82	92	0.97	0.96	207	38	142	151	2.67	13	22	15	0.64		25.1924	1.81	8.36	4.9	100	60	6.2	15156	1	3	1	81	25.2075	99	0.67	0.93	213	39	138	186	19	28	24	5.5	6.3			120	70
1	49			1	1	59.2	74	85	1.19	1.11	187	56	112	50	0.31	33	34	32	0.59	11.6667	21.2525	1.13	1.26	4.9	120	80	5	8830	1	3	2	91	22.8932	89	0.7	0.99	169	36	89	212	59	31	32		4.8	0.42		120	70
1	48			3	1	51.1	77	95	1.49	1.18	117	21	11	567	1.09	323	212	70	2.12	53.5714	20.0863	1.45	0.67	6.4	130	80	5.3	8249	3	2	1	78	20.7684	108	0.32	0.95	169	39	95	135	170	23	26	7.6	5.9			112	70
1	66		2	3	1	67.9	88	117	0.93	1.05	174	43	108	57	1.65	41	30	35	6.53	107.143	25.2762	1.99	1.84	4.6	130	70	6.5	11885	2	3	1	95	26.4079	217	0.49	1.08	167	36	96	141	48	31	43	4.4	9.6			130	80
2	65			1	1	69.7	93	93	1.07	0.9	227	41	156	112	0.35	18	24	25	0.34		27.1586	1.29	5.75	4	110	70	5.4	13639	1	1	2	93	27.3096	88	0.9	0.92	266	47	199	131	16	23	20		5.5	0.32		111	69
2	47			1	2	59.6	76	95	1.08	0.89	209	56	126	104	0.32	11	22	14	0.69		22.5427	1.41	6.69	3.8	120	80	4.8	12947	1	3	1	91	24.1988	104	0.99	0.8	171	39	101	123	12	17	15	4	5.2			112	80
1	70			1	1	62.1	78	87	0.88	1.12	185	37	124	89	0.63	11	31	18	0.41		21.6148	0.87	1.53	4.9	100	70	5.3	9340	1	1	1	81	21.6148	85	0.64	1.01	213	37	155	65	13	22	17	5.1	5.9			122	80
1	64			2	1	52	69	93	0.64	1.12	218	57	129	89	1.91	11	30	14	3.89		19.8141	0.45	1.05	7.1	110	60	5.9	11876	1	1	1	72	20.2939	92	1.1	1.05	187	51	113	139	12	28	18		5.9	3.99		110	70
2	49			1	1	78.3	93	86	0.88	0.87	216	65	115	144	5.15	9	23	17	0.35		28.2784	1.21	10.29	3.2	120	80	5.1	11056	1	3	1	93	26.6811	86	1.4	0.78	247	70	132	118	19	15	6		5.5	2.71		129	89
1	54			3	1	77.7	91	90	0.84	0.93	197	51	115	140	0.55	107	36	35	0.28	16.6667	24.634	1.59	5.97	4.5	120	70	5.4	14030	3	3	1	93	24.1038	105	1.1	0.8	144	35	75	120	120	29	34		5.7	3.75		117	77
2	45			1	1	75.1	93	90	0.83	0.84	178	41	111	138	1.69	10	17	12	0.42		30.0453	1.94	8.55	3.4	130	80	5.7	9294	1	1	1	97	31.0439	95	0.5	0.62	210	43	125	118	12	18	23		5.9	0.71		111	69
2	46			1	1	64.2	74	93	0.75	0.87	178	46	108	71	0.16	16	19	19	1.83	12.5	25.6197	1.31	5.13	3.3	120	70	5.4	6960	1	3	1	80	24.7902	90	1	0.7	248	56	155	71	36	14	10		6	0.29		118	68
1	54			3	2	66.4	79	77	1.13	1.04	200	48	119	140	2.71	21	27	23	0.9	198.333	22.5231	0.99	1.08	6.3	120	80	4.7	8890	3	3	1	88	23.3644	87	1	1.04	210	40	106	262	26	24	28		5.2	3.42		120	80
1	49			3	1	63	75	88	0.66	0.89	180	51	107	53	1.11	37	33	30	0.7	71.4286	23.4808	1.17	0.82	4.8	120	80	5.3	5113	3	3	1	88	24.6748	88	0.56	0.95	170	44	96	154	43	32	36	4.5	5.8			150	100
2	39			1	2	56.7	75	80	0.57	0.7	167	44	90	154	0.23	15	23	27	0.59		24.0013	2.27	9.03	3.8	100	60	4.9	7606	1	1	2	81	23.9167	83	0.53	0.76	210	43	126	182	14	20	15	3.9	5.2			102	70
1	49			1	1	60.6	79	94	0.92	0.89	157	37	87	166	0.68	18	21	24	0.9	89.7619	22.6139	1.14	0.94	4.3	120	80	5.2	7952	1	3	1	83	23.2836	89	0.8	0.91	164	40	90	166	17	22	17		5.2	0.35		120	70
2	47			1	1	58.3	73	90	1.16	0.8	178	70	72	157	0.12	16	19	17	1.93		23.4129	1.48	6.93	3.9	130	80	5	13424	1	3	1	84	23.8645	87	1.4	0.85	213	83	101	95	20	17	16		4.8	0.07		120	80
1	51			1	1	53.9	76	71	0.9	0.97	156	29	88	197	0.35	11	21	22	0.63		20.1383	0.84	1.76	3.9	120	80	5	9107	1	1	1	79	19.7732	84	0.9	0.92	147	32	85	114	12	16	16		5.3	0.23		112	71
2	48			1	2	59.5	79	84	0.55	0.89	118	28	48	280	0.43	8	27	25	0.36		24.9587	1.02	5.34	3.2	100	70	5.3	6097	1	1		82	24.1717	77	0.7	0.84	127	28	71	110	5	22	14		5.7	0.5		110	68
1	56			3	2	79.3	98	89	1.19	0.94	221	58	135	101	2.21	46	34	32	0.75	125	30.3662	2.03	7.07	7.7	130	80	5.7	2912	2	3	2	104	30.9785	93	0.9	0.86	216	56	129	170	45	31	25		5.5	1.03		120	70
2	51			1	1	59.5	83	87	0.55	0.83	194	51	112	134	0.46	12	20	20	0.43		23.8645	1.39	7.84	4	110	70	5.3	12050	1	1	1	86	25.0761	86	0.3	0.81	163	35	95	139	23	33	45		5.1	0.59		120	70
2	64			1	1	45.1	71	93	1.01	0.91	190	50	119	54	0.63	5	24	18	0.39		20.479	1.11	2.1	4.5	100	70	5.6	8576	1	1	1	79	21.2796	97	0.5	0.84	233	50	156	129	10	26	23		5.7	0.89		90	70
1	61			3	1	66.4	78	88	0.88	1.1	199	42	128	106	0.33	20	27	28	0.59		20.5623	1.05	0.66	5.2	110	80	5.3	9541	2	1	1	87	20.6933	88	0.6	1.12	203	35	123	241	19	19	20		5.2	0.13		120	88
2	47			1	1	60.2	79	90	1.38	0.9	206	52	129	79	0.65	10	29	30	6.33		25.3508	2.36	13.32	4.1	120	80	5.3	8856	1	1		77	25.7012	85	1.4	0.85	180	47	107	66	7	19	14		5.8	0.87		112	72
2	51			1	1	53.7	81	83	0.79	0.73	176	44	109	60	2.33	26	24	31	0.37	18	23.6769	1.43	3.86	3.5	110	80	5.2	11378	1	1	1	80	24.1418	77	0.55	0.78	267	56	187	84	32	24	41	4.3	5.6			118	70
2	64			1	1	44.3	74	94	0.76	0.83	162	65	70	116	0.67	41	32	20	0.43	53.5714	18.7768	1.39	4.46	4.6	110	70	5.2	10939	1	3	1	75	19.2353	86	0.6	0.86	232	54	140	149	52	35	31	5.8	5.8			120	80
2	44			1	1	66.4	91	118	0.66	0.8	227	59	148	89	0.69	41	28	29	0.28		31.8886	2.23	8.75	3.6	110	70	6.5	4721	1	3	1	91	31.9133	127	0.66	0.74	200	51	131	77	33	27	20	3.3	6.7			132	80
2	66			1	1	48.1	70	78	0.51	0.71	171	61	82	119	0.21	15	23	22	0.58		21.3778	0.93	0.94	3.2	110	70	5.6	21266	1	1	1	77	21.8301	88	0.49	0.67	190	52	113	115	11	23	17	3	5.4			108	70
1	60			2	1	60.7	77	93	1.21	1.36	223	69	137	79	0.24	34	38	34	0.61		21.2779	1.35	0.91	6.1	120	80	5.3	6930	1	1	1	83	24.4014	96	1.1	1.13	154	61	72	73	19	27	16		5.3	0.15		110	70
2	50			1	1	60.3	82	78	0.57	0.89	249	78	147	111	0.43	15	28	26	0.42		26.1682	1.4	8.64	5.1	100	70	5.5	7119	1	1	1	88	25.0295	84	0.63	0.86	250	67	155	132	11	23	22	6.2	4.8			110	72
1	65			1	1	64.8	89	77	0.97	1.11	207	49	136	131	1.06	41	50	54	0.33		26.8332	1.53	4.32	5.8	110	70	5.3	10212	1	3	2	86	26.1677	86	0.9	1.01	190	34	119	238	33	40	47		5.4	1.23		110	69
2	53			1	1	51.5	76	97	0.79	0.83	205	62	108	160	0.12	37	27	22	0.36		22.4972	3.18	7.73	2.8	110	70	5	10479	1	1	1	80.2	22.163	88	1	0.79	207	69	106	51	37	27	20	3.5	5.3			108	70
2	52			1	2	60.6	70	85	1.12	0.94	215	52	137	84	0.54	11	19	11	1.46		25.5524	1.46	12.48	4.4	120	80	5.4	10891	1	1	1	87	25.6495	95	0.52	0.75	172	37	114	70	12	17	11	4.2	6			108	60
2	61		3	1	2	74.5	96	116	0.77	1.01	205	45	130	124	1.86	28	29	25	2.46		32.2455	3.46	18.01	5.8	130	80	8.2	9461	1	1	2	106	34.6739	144	0.69	0.86	221	46	142	130	45	39	44	5.1	8.3			128	78
2	54			1	2	66.6	84	93	0.59	0.84	173	47	95	115	0.87	18	25	24	0.78		26.8481	1.67	10.96	4.2	110	80	5.5	5039	1	1	2	87	27.0213	93	0.58	0.83	204	44	136	74	17	24	25	4.3	6.1			120	70
2	54		2	1	1	56.2	79	175	0.94	1.03	162	61	79	72	24.19	371	98	145	14.22		23.5745	3.95	8.99	4.3	110	80	9.6	13616	1	1	1	83	24.434	145	0.47	1.17	205	68	114	110	106	30	23	4.3	6.9			130	70
2	58		2	1	1	53.4	78	124	1.31	0.77	185	44	121	71	0.63	17	19	25	0.76		21.2293	1.77	2.2	4.4	100	60	8.3	5888	1	1	2	83	22.4787	97	0.9	0.8	173	41	83	290	26	29	36		6.7	0.32		119	70
2	54			1	1	58.8	81	89	1.46	0.88	245	55	164	79	0.41	12	22	15	0.47		25.4501	1.36	6.14	3.2	110	70	5	12250	1	1	1	82	25.532	88	1	0.84	219	42	133	177	12	27	20		4.8	0.23		122	70
2	42			1	2	55	72	76	0.93	0.84	161	54	86	63	0.27	6	16	12	0.81		22.0317	1.4	4.43	2.5	120	70	5	19625	1	3	1	84	21.5671	86	0.46	0.79	170	57	67	124	14	25	26	3	5.4			118	80
2	63			1	1	59.9	91	84	0.57	0.79	181	56	103	81	0.63	25	29	22	0.93		25.8582	1.69	8.99	4.1	110	70	5.1	21232	1	1	1	87	25.7639	86	0.9	0.74	210	58	120	131	39	24	35		4.9	0.26		137	90
2	42			1	2	53.4	71	83	0.87	0.88	181	63	94	76	0.32	10	19	7	0.28	36.4286	21.4179	1.09	4.84	2.7	110	70	4.7	13052	1	1	2	78	22.2	83	0.5	0.81	182	64	99	50	9	19	9		4.6	0.29		110	70
1	61		2	2	1	74.4	86	159	0.9	1.04	212	41	134	158	0.74	25	31	33	1	50	25.9573	2.47	4.38	6.5	120	80	6	7401	3	3	1	82	22.9529	145	1.04	1	153	38	78	119	24	16	14	5.4	5.7			101	60
2	53			1	2	51.2	77	83	0.86	0.88	277	55	189	113	0.39	10	25	21	1.51		22.1315	1.53	8.71	3.2	120	80	4.9	15697	1	1	2	81.7	23.9945	87	0.89	0.86	211	52	124	106	11	27	21	3.3	5.5			110	60
1	52		2	2	1	74.5	90	110	0.89	1.17	193	41	128	70	1.21	34	35	40	0.4	125	26.0537	3.33	4.87	4.2	120	70	6	5542	1	3	2	94	25.1548	129	0.7	1.05	148	38	84	110	27	29	46		6.1	0.7		106	66
2	60			1	1	57.7	80	115	1.01	0.86	187	42	119	97	10.11	18	24	20	1.42		24.298	2.09	5.74	3.5	130	70	5.5	13575	1	1	2	84	24.5516	107	2	0.82	216	52	124	175	13	26	21		5.1	0.89		130	80
1	62			3	1	45.3	65	88	0.91	0.99	163	55	82	61	0.48	15	33	32	0.54		17.8512	4.59	0.61	3.5	120	80	5	15028	3	1	1	67	18.3372	81	0.6	0.93	143	48	75	64	11	21	25		5.2	0.23		90	59
1	63		2	2	2	66.7	82	112	0.63	1.04	161	35	96	90	1.93	22	26	33	0.78		24.8598	2.72	3.54	6.4	110	80	5.6	5016	1	1	2	93	25.7061	114	0.8	1.03	183	34	115	153	18	27	45		6.1	0.81		119	69
2	53			1	1	58	70	91	0.96	0.87	231	57	144	88	0.33	17	24	17	1.03		24.5197	1.3	8.33	3.9	130	80	5	14814	1	1	1	72.5	24.5632	86	1.11	0.81	226	55	137	89	13	23	19	3.8	5.5			126	70
1	68			2	1	53.7	76	94	0.57	1.14	210	51	131	58	25.78	23	26	19	0.64	100	19.278	0.98	2.11	7.8	130	80	4.9	6160	1	2	2	84	20.8355	85	0.6	1.22	207	42	121	177	57	19	7		5.5	12.01		110	70
1	61			1	2	60	78	89	2.49	1.3	165	38	99	122	0.23	34	22	19	0.55	14.2857	22.6104	0.93	1.79	5.7	110	80	4.8	10511	1	3	2	85	23.0341	88	1.5	1.22	125	33	60	137	38	18	13		4.7	1.54		120	69
2	69			1	2	47.9	68	84	1.05	0.99	229	60	141	63	0.42	10	41	38	0.57		19.5073	0.96	3.04	5.3	120	70	5.4	7311	1	1	2	69	18.4892	84	0.9	0.91	219	54	120	102	8	28	17		5.5	0.14		125	70
2	44			1	1	51.6	74	97	0.89	0.9	203	42	132	92	0.26	12	20	17	0.55	89.2857	21.041	1.34	3.72	3.3	110	80	5.2	13155	1	2	2	77	20.0833	113	0.65	0.79	170	46	106	76	12	17	16	3.5	5.5			128	80
2	44			1	2	58.1	71	77	1.22	0.92	185	56	105	67	0.47	9	26	17	0.65	36.6667	21.7075	0.86	4.5	3.8	120	80	4.8	20327	1	3	2	76	21.8036	79	1	0.84	203	57	110	66	11	26	14		5.2	0.52		90	60
2	63			1	1	51.9	77	84	0.64	0.85	258	50	162	224	0.43	18	25	21	0.29		21.3812	1	3.83	3.4	110	80	4.9	16781	1	1	1	79	21.3258	95	0.6	0.82	239	49	146	314	23	31	35		5.5	0.9		110	69
1	56		2	3	1	62.1	83	138	0.57	1.3	233	44	149	174	2.75	19	22	15	8.85		22.2935	1.97	3.21	6.8	120	70	6.4	7381	3	1	1	80	21.1134	115	0.6	1.23	182	36	107	169	33	23	20		7.8	1.36		102	61
2	67			1	2	56.7	89	81	0.52	1.21	201	42	124	187	1.41	18	28	18	0.18		25.471	1.34	16.51	2.7	110	80	5.1	17480	1	1	2	94	25.4396	87	0.8	1.03	219	36	149	170	15	29	16	4.4	5.6			132	82
2	47			1	2	58.1	74	80	0.58	0.82	172	41	103	110	0.32	14	20	16	0.32		25.549	1.71	11	3.6	120	80	4.9	9923	1	1	1	84.4	24.9307	89	0.64	0.75	203	43	131	99	14	20	21	4.4	5.7			107	72
2	60			1	1	56.6	81	78	0.76	0.86	163	42	92	99	1.76	16	31	31	0.54		24.5302	1.21	8.58	4.5	110	60	4.8	13193	1	1	1	93	26.4635	85	1.11	0.79	188	42	113	132	17	34	39	3.8	5.2			122	70
2	49			1	1	54.9	82	84	1	0.76	184	41	124	71	0.27	11	18	7	0.37		22.2161	0.92	5.84	4.1	100	50	5.8	11041	1	1	1	81	21.7513	91	0.8	0.68	211	45	142	99	9	25	21		6.3	0.3		102	62
2	40			1	2	45.5	66	87	0.74	0.9	233	64	137	132	0.51	17	17	9	0.67		21.2871	1.65	4.43	4.3	110	80	5.1	8283	1	1	2	67	21.4217	84	0.8	0.77	190	58	110	56	11	18	14		5.3	0.39		111	61
2	62			1	1	60.8	83	83	0.73	1.01	242	49	145	150	1.01	16	20	16	0.36		27.8704	1.17	6.63	5.9	110	80	5.2	10191	1	1	1	91	27.3396	79	0.7	0.94	225	44	131	188	13	26	22		5.9	0.35		110	72
2	45			1	2	60.7	77	86	0.9	0.94	202	37	133	110	0.2	11	23	12	0.85		25.4951	2.02	7.47	3.9	120	80	5.2	11047	1	1	2	80	23.395	83	0.9	0.96	204	41	130	81	14	20	7		5.7	0.05		117	68
2	60			1	2	60.1	80	82	1.12	0.86	174	32	111	141	2.52	37	28	25	0.2		26.0471	1.35	11.46	4.1	110	70	5.5	12720	1	1	2	84	25.5114	83	1.8	0.84	223	40	150	121	37	29	28		6.1	2.51		111	66
2	56			1	1	54.4	68	92	0.62	1	236	70	135	62	1.11	12	25	17	0.11		22.5267	1.12	9.82	5.5	110	80	5.3	12854	1	1	1	72	22.6534	86	0.7	0.88	193	68	97	152	14	22	18		5.2	1.02		120	69
2	43			1	1	74.1	96	86	0.75	1.17	145	33	79	103	0.93	9	18	14	0.58		31.3668	1.31	21.26	4.5	120	80	4.9	11515	1	1	2	87	25.6767	97	1.07	0.97	154	36	90	96	10	19	18	3.7	5.4			100	60
2	51			1	1	64.9	79	97	0.41	0.88	195	65	100	70	2.47	83	26	19	0.25	12.5	27.5082	1.86	3.94	2.9	110	80	3.8	22072	1	3	1	76	24.7955	87	0.48	0.84	166	76	71	73	26	21	16	3.3	5.1			110	70
2	55			1	2	57.3	77	79	0.73	0.84	117	43	56	37	23.95	8	36	28	0.53		23.0113	1.57	2.94	4	130	80	5.1	8546	1	1	2	75	22.0352	83	1.2	0.77	156	41	84	81	7	28	25		5.2	0.22		120	80
1	67			2	1	66.8	89	87	0.94	1.2	259	54	182	110	5.63	24	22	24	1.25		23.8948	1.18	1.68	4.5	120	70	4.8	4270	1	1	1	92	24.1393	88	0.86	1.14	237	33	155	247	26	24	31	3.6	5.3			128	68
2	49			1	2	65.3	81	89	0.89	0.9	206	41	138	118	1.78	20	25	30	1.15		25.2546	1.45	7.73	5	120	80	5.1	9090	1	3	2	85	25.3293	77	0.7	0.85	230	46	151	122	16	26	31		5.1	2.78		128	80
1	55			1	1	73	94	111	1.26	1.36	129	32	56	219	0.32	31	27	21	0.3	29.1667	26.5555	1.8	3.08	5.1	120	80	5.3	2908	1	3	1	93	26.3456	114	1.44	1.15	142	36	74	163	34	26	21	4.7	5.8			110	70
2	47			1	1	63.9	81	86	0.88	0.91	180	51	99	65	0.21	11	17	15	0.28	33	26.8392	1.42	9.16	4	110	60	5	12324	1	2	2	82	27.0072	93	0.78	0.87	152	45	77	68	12	31	39	4	5.5			112	70
1	43			3	1	65	79	95	0.61	1.09	185	32	113	116	0.49	25	21	20	0.33		21.1037	1.41	1.75	5.9	110	80	5	10529	3	1	1	77	20.3942	94	0.69	1.07	184	38	121	80	15	24	22	5.6	5.5			120	80
1	68			2	1	89.7	101	84	0.92	1.08	119	39	57	55	0.52	20	43	33	0.58		29.8328	0.92	2.3	6.3	110	70	4.9	7405	1	1	1	101.5	27.8048	89	0.64	1.13	149	38	80	75	25	21	30	7	5.4			144	92
2	47			1	2	62.5	77	96	0.87	0.85	184	46	102	119	0.12	13	21	15	0.45	31.3333	25.356	2.21	9.51	4.7	130	80	5.1	6112	1	3	2	83	25.3071	98	1	0.76	147	35	82	91	11	22	25		5.6	0.05		120	70
1	58			1	1	59.9	81	80	1.13	1.18	193	48	112	64	0.16	24	16	15	0.45		21.0973	1.01	1.23	5.5	120	70	4.5	9039	3	3	1	77	20.7065	82	0.56	1.14	206	50	119	56	19	19	15	3.9	5			130	80
2	51			1	1	60.8	93	81	1.14	0.98	192	34	114	144	1.28	30	19	21	0.64		28.7987	2.49	12.32	3.6	130	80	5.5	5777	1	1	1	95	30.2438	101	0.79	1.03	246	34	177	179	33	27	39	3.3	6.1			132	89
2	58			1	2	54	71	89	0.69	0.81	219	70	117	79	0.29	11	23	16	0.79		22.8584	1.66	6.77	3.6	110	60	5.1	16772	1	1	2	75	21.6432	82	0.9	0.93	215	61	120	61	7	26	17		5.5	0.22		110	67
2	63			1	2	56.2	71	83	0.75	0.96	262	73	148	102	1.12	45	30	14	0.2	35.7143	23.4225	0.99	5.57	4.5	100	60	5.1	12407	1	3	2	79.5	22.639	96	0.79	0.9	163	56	77	62	49	35	28	3.8	5.7			108	70
2	41			1	1	46.7	63	85	0.88	0.76	181	63	83	88	0.25	20	14	15	0.38		19.6658	2.23	8.92	4.1	110	70	4.8	10353	1	1	1	71.2	20.3396	85	0.46	0.74	183	55	94	52	12	16	13	3.1	5.2			102	58
2	49			1	1	56.3	78	94	0.84	1	202	48	119	138	0.66	19	17	16	0.25		21.8554	2.6	11.29	5.4	110	60	5.2	13757	1	1	2	83	21.7389	85	0.85	0.85	209	43	133	151	24	24	40	5.3	5.8			110	60
2	70			1	1	39.6	64	78	0.71	0.88	172	53	91	81	0.79	19	26	19	0.85		18.2017	0.98	2.38	3.5	110	80	5	6856	1	1	1	78	20.4266	79	0.5	0.88	176	39	105	144	12	26	18		5.6	0.27		130	80
2	44			1	1	67.4	84	110	1.2	0.85	181	48	106	92	0.82	12	31	17	0.33	3.33333	27.874	1.44	9.36	5.4	110	80	5.8	14393	1	3	2	90	28.0139	119	0.9	1.15	237	58	140	132	27	23	15		6.4	0.51		120	80
1	63			3	1	56.8	73	94	1.2	1.05	196	89	79	70	2.28	61	30	9	0.33	71.4286	20.1008	1.19	1.06	6.1	120	80	5.3	4878	3	3	2	79	20.0434	95	0.69	1	177	75	64	90	177	30	11	6.7	5.6			130	80
2	60			3	1	56.1	69	88	0.69	0.88	186	42	117	75	0.94	37	23	19	0.76		22.7017	1.05	2.37	3.6	120	80	5.7	19260	3	1	2	80	23.5014	92	0.54	0.84	193	42	128	40	20	23	22	3.9	6			104	74
2	54			1	2	54	70	72	1.14	1.01	177	63	89	72	2.54	27	25	15	1.29		22.2749	1	13.76	6.1	130	80	5.2	12660	1	1	2	75	21.8388	80	0.6	0.73	136	36	73	90	11	21	17		5.2	0.16		126	71
2	60		2	1	1	53.2	80	162	0.65	0.92	197	57	117	116	0.71	23	22	18	0.34		22.6966	2.48	4.96	4.3	130	80	7.6	11161	1	3	1	83	22.6113	158	0.7	0.78	178	48	103	91	17	20	18		8.2	0.32		112	70
1	42			3	1	74.6	97	97	1.72	1.03	203	43	137	135	1.5	66	27	39	0.43	83.3333	25.9657	1.81	2.64	5.3	120	80	5.3	8170	3	3	2		25.796	92	1.6	0.97	178	38	105	88	39	21	22	6	5.5			110	70
1	54			1	2	69.3	89	87	1.05	0.88	181	62	103	64	0.4	35	29	20	0.29	178.571	23.8388	1.16	1.31	4.6	110	80	4.8	7610	1	3	2	92	23.768	88	1	0.83	180	66	84	120	37	30	23		4.5	3.38		110	70
1	43			2	1	60.2	77	81	0.58	1.17	208	43	94	301	1.6	25	17	19	0.56		22.9669	1.65	1.71	7.3	120	80	5.3	5879	1	1	1	80	23.5101	87	0.5	1.22	178	45	108	105	23	26	28		5.3	0.54		119	69
2	42			1	1	59.4	77	85	1.97	0.8	186	62	107	56	0.88	37	19	19	0.34		24.0677	1.57	4.38	4	110	70	4.9	10857	1	3	1	78	23.8955	94	1.5	0.7	185	51	107	110	44	34	34		5.1	1.18		112	71
2	61		2	1	1	56.5	87	113	0.6	1.07	182	53	106	97	0.89	22	23	22	0.27		24.0103	3.15	12.49	5.5	120	80	6.7	11280	1	1	1	82.2	23.2092	121	0.32	1.01	146	38	71	148	19	17	26	5.5	9			120	80
1	45			1	1	51.5	69	102	0.72	0.96	181	53	111	68	0.24	18	18	13	0.23	136.571	17.5917	1.29	0.5	4.5	120	80	4.9	12316	1	3	1	71	18.1728	86	1.14	0.98	199	42	132	48	14	20	13	5.4	5.4			122	80
1	46			3	1	59.9	75	93	0.59	1.29	212	47	134	158	0.96	19	24	15	0.25	52.5714	20.2239	1.04	0.65	6	110	70	5.7	18357	3	3	1	71.5	19.628	85	0.72	1.24	214	46	147	61	17	37	28	6.3	5.6			102	70
2	63			1	1	59.9	88	92	0.62	0.86	196	44	99	323	2.09	17	25	24	0.32	48.6667	24.7723	2.28	6.69	3.1	135	72	5.7	10999	1	3	1	90	24.1727	104	0.73	0.8	200	46	105	242	13	31	29	2.8	6			118	80
1	54			1	1	72.4	90	86	0.84	1.11	191	44	121	212	0.49	22	20	22	0.86		25.7438	1.65	2.69	6	110	80	5.5	5349	1	1	1	90	25.5455	86	1	1.12	196	39	123	189	23	23	26		5.8	0.85		116	69
2	50			1	2	60.1	82	78	0.87	0.89	255	45	162	347	1.71	18	20	18	0.36		26.1848	2.16	5.36	7.2	120	80	5.6	2795	1	1	1	81	25.4778	86	0.8	0.86	197	36	117	239	21	28	33		5.8	0.47		121	69
2	64			1	2	58.8	76	87	0.78	0.98	210	35	142	181	0.69	13	20	14	0.29		24.9227	1.12	3	4.8	120	80	5.3	9111	1	1	1	84	26.8425	89	0.74	1.18	273	37	198	236	14	17	16	5.7	5.6			124	80
1	44			3	2	65	79	85	0.73	1.05	187	48	115	124	0.58	8	22	21	0.24	25.3333	21.4199	1.69			115	80	5.4	10339	3	1	1	78	21.2615	83	0.79	1.14	189	42	129	88	6	15	13	4.8	5.7			120	70
2	42			1	1	53.6	77	98	0.59	0.75	219	57	153	55	0.8	17	18	12	0.2		22.4257	1.9	10.77	4.4	130	80	5.8	6744	1	3	1	84.4	23.7057	100	0.61	0.68	245	49	185	90	13	16	12	4.1	6.1			124	80
1	47			3	1	72.7	83	92	0.94	1.12	139	50	66	125	0.49	29	28	15	7.44	178.571	24.2348	1.81			110	80	5.2	6331	3	3	2	84.9	25.0169	98	0.66	1.09	135	39	72	89	26	23	13	5.8	4.9			110	80
2	56			1	1	37.5	68	82	0.7	0.75	214	40	145	266	1.93	44	31	29	0.48		27.6299	0.91	1.96	4.8	100	60	5.3	18966	1	1	1	71	27.4765	82	0.59	0.65	194	30	124	202	26	33	19	3.8	5.6			136	70
2	51			1	1	80.3	90	113	1	0.87	186	48	128	97	1.31	21	14	14	1.9	5	29.1407	4.3	39.69	3.5	125	75	5.2	9203	1	1	1	92	28.0955	121	1.35	0.96	174	36	102	129	18	16	16	4	5.6			120	82
2	48			1	1	57.9	77	84	0.65	0.91	210	53	155	57	0.27	14	20	13	0.31		26.0449	1.26	6.22	4	110	70	5.5	5183	1	1	1	80	25.1565	85	0.7	0.83	227	38	129	260	17	18	15		5.5	0.28		120	70
2	48			1	1	79.5	93	88	0.79	0.85	243	47	175	203	1.37	18	19	17	0.74		29.6667	2.07	13.63	4.8	120	70	5.1	2511	1	1	1	98	28.8063	97	0.8	0.79	230	40	155	108	26	41	42		5.2	13.84		113	72
2	48			1	1	56.8	75	87	0.53	0.88	131	34	86	104	0.3	7	18	11	10.29		24.2959	2.47	5.84	3.7	131	78	5.7	11675	1	1	1	77.5	23.6734	83	0.78	0.9	180	35	128	126	11	24	18	3.2	5.1			120	80
1	52		2	3	2	69.6	88	129	0.59	1.17	197	53	133	121	0.38	52	32	23	1.19	106.786	23.9139	2	2.71	6.9	123	78	7.3	9461	3	3	2	93	24.5435	212	0.7	1.06	188	61	96	148	131	33	32		8.7	0.41		122	92
2	48			1	1	48.2	68	88	1.31	0.95	193	60	123	84	0.2	16	22	17	1.13		21.3368	1.43	2.08	4	110	60	4.9	12741	1	1	1	72	21.0549	94	1.4	0.74	181	55	90	115	9	23	20		5.3	1.06		111	69
2	49			1	1	57.4	80	89	0.83	0.85	190	64	114	128	0.87	9	16	9	1.08		25.0746	1.68	10.97	3.7	136	75	5.1	10823	1	1	1	83	24.4954	86	1	0.89	210	54	119	134	7	22	13		5.6	0.26		102	59
2	52			1	1	54.2	78	90	0.87	1.04	164	35	110	132	0.28	10	29	20	1.35		22.3001	2.29	4.67	5.2	130	80	5.3	15371	1	1	2	79	21.5043	83	1.1	0.94	190	36	128	107	7	27	19		5.7	0.11		111	68
2	48			1	1	66.2	85	91	0.86	0.89	203	78	117	97	0.4	12	23	20	11.57		27.4837	1.63	11.85	4.4	134	77	5.2	12258	1	1	1	83	27.5491	92	0.7	0.79	205	68	112	91	8	22	17		6	0.18		128	82
1	50			3	1	73.8	93	101	0.67	0.99	192	50	132	40	0.76	25	25	25	0.21	71.4286	26.1169	1.59	1.24	5.5	100	70	5.1	5841	3	3	1	91	25.1559	100	0.91	0.99	188	36	125	89	16	21	22	5.3	5.5			130	90
1	50			3	1	73.4	90	90	1.01	1.1	228	41	156	165	0.66	19	28	29	9.06		23.6958	1.16			120	80	5.6	5320	3	1	2	93.6	23.2996	97	0.58	1.03	194	28	131	145	12	23	21	6.2	5.8			130	70
2	47			1	2	59.6	78	88	1.15	0.94	196	35	133	126	8.54	16	19	13	15.27		24.6165	1.6	7.65	4.1	120	80	5.4	4103	1	1	1	79	23.3587	92	0.78	1.03	186	26	123	157	15	22	37	4.2	5.9			120	80
2	46			1	2	55.2	72	79	0.94	1	163	45	90	139	1.35	10	24	16	0.2		24.2095	1.21	8.9	4.7	110	80	5.1	7478	1	1	2	80	25.0213	89	0.58	0.9	143	36	82	80	13	20	18	3.6	5.3			108	60
2	42			1	2	97.9	110	101	0.74	0.85	190	33	137	70	7.8	22	16	22	0.62		38.8223	5.19	31.45	4.8	120	70	5.3	1414	1	3	2	112	36.9585	102	0.8	0.84	186	43	109	83	22	19	24		5.8	6.62		119	89
1	59			2	1	57.4	82	95	0.61	0.99	230	65	143	125	0.53	35	26	21	1.39	125	21.8178	1.54	2.45	6.8	110	70	5.1	3795	1	3	1	86	22.1477	93	0.9	0.96	246	56	136	235	29	26	24		5.6	0.9		110	69
2	53			2	1	49.8	82	89	0.9	0.88	157	50	83	100	2.03	12	17	11	0.26		28.3232	1.62	13.13	5.4	120	80	5	9404	1	1	2	87	28.3227	93	1.1	0.75	190	54	99	127	14	18	18		5.5	2.06		127	82
2	48			1	1	55.5	72	95	1.13	0.81	156	35	98	88	0.46	9	22	24	0.67		22.4589	3.04	5.06	3.3	110	80	4.8	8231	1	1	2	75	22.8862	102	1.09	0.73	174	38	118	42	13	22	27	3.8	5.2			119	70
2	41			1	1	55.5	64	92	1.04	0.84	218	68	130	77	0.25	20	26	21	0.64		21.6526	2.61	3.29	4.5	120	70	5.4	14531	1	1	1	74.5	23.6504	88	0.96	0.71	247	56	149	158	15	50	54	4.7	5.8			100	60
2	48			1	1	54.4	81	85	0.61	0.77	116	43	51	52	6.54	14	21	13	0.41		23.4839	1.22	7.26	5	100	60	4.7	7779	1	1	1	80	23.1944	84	1	0.74	167	44	71	204	14	25	25		4.8	0.65		96	60
2	50			1	2	66.2	88	100	1.38	0.86	167	38	84	318	1.23	16	22	19	0.74		26.3511	2.06	8.99	4.3	110	70	5.7	3146	1	1	1	89	24.2721	106	1.3	0.79	180	37	86	370	13	20	20		6.6	0.98		119	80
2	51			1	2	59.5	72	81	2.15	0.84	204	71	124	55	0.49	8	25	26	0.3		22.2034	1.3	6.03	3.9	100	60	4.9	10239	1	1	1	93.1	21.7981	92	1.18	0.73	200	54	110	105	13	20	17	2.5	5.3			120	80
2	47			1	1	64.2	81	87	0.63	0.82	173	41	115	78	1.05	26	27	27	0.43		25.3308	1.67	12.44	4.4	110	80	5.3	11067	1	3	1	82.5	24.0682	94	0.56	0.71	170	36	120	117	22	19	14	4.5	5.8			100	70
1	49		2	1	2	80.7	94	174	0.77	1.22	212	43	147	169	4.25	110	30	47	0.34		28.3223	2.45	4.04	6.9	100	60	8.3	5216	1	1	2	97	27.5249	147	0.72	1.19	226	31	157	179	75	22	55	8.3	8.6			94	52
2	51			1	1	53.7	74	78	1.51	0.83	238	62	165	65	0.36	23	38	46	0.46		22.7907	1.31	3.53	5.3	110	70	5.2	12487	1	1	1	78	21.6309	82	1.4	0.81	257	50	158	115	18	23	21		5.4	0.19		110	70
1	57			1	1	59.9	82	92	1.09	0.99	189	58	102	163	1.41	615	40	55	0.75	89.2857	21.6332	1.41	2.12	7.2	100	70	4.9	4952	1	2	1	88	22.1697	93	0.8	1.03	219	48	126	155	98	36	47		5	0.97		120	70
2	52			1	1	51.3	73	88	0.74	0.84	197	78	99	109	0.31	7	20	17	0.32		21.408	1.11	4.71	5.9	100	70	5.3	21302	1	1	1	77	22.0948	97	0.8	0.7	218	82	105	100	12	24	18		5.4	0.48		130	79
2	64			1	2	71.5	93	90	1.06	0.84	151	45	80	140	0.63	16	31	25	0.42		31.5251	2.23	18.71	3	110	60	5.1	11627	1	1	2	97	32.5424	103	1.07	0.87	171	52	92	64	18	27	21	3.1	5.4			100	60
2	40			1	1	64.5	80	86	0.77	1.01	252	57	182	84	0.69	17	20	16	0.21	67.8571	27.3387	1.86	14.5	4.5	110	80	5.4	4984	1	3	1	91	27.0068	97	0.56	0.98	219	44	147	134	20	17	14	3.7	5.7			100	60
1	43			3	1	64.1	80	83	0.6	1.12	209	41	135	194	3.22	40	31	60	1.43	73.8095	22.6842	1.63	2.46	5.2	127	72	5.4	7793	3	3	2	83	23.4198	105	0.61	0.99	205	33	132	245	45	31	51	6	5.4			100	70
2	47		4	1	1	57.2	73	86	0.83	0.8	184	68	101	69	0.31	12	22	18	0.29		23.6861	1.94	6.61	4.1	120	80	5.3	11050	1	1	2	74	23.2237	94	0.62	0.76	169	51	96	47	12	24	19	4.1	5.8			108	70
2	47			1	1	54.5	74	102	1.18	0.87	129	58	55	49	19.95	21	20	16	1.05	35.6667	20.5631	1.95	5.79	3.2	110	80	5.3	6491	1	3	2	82	22.0663	105	0.79	0.8	162	56	80	91	17	17	12	2.3	6.2			110	70
1	48			3	1	56.8	77	97	1.02	1.1	171	30	114	142	0.45	16	21	18	1.28	28.5714	22.022	1.41			110	70	5.4	1163	3	3	1	82	22.867	88	0.99	1.08	206	31	147	178	18	23	32	5.4	5.9			110	70
2	50			3	1	60.6	83	85	0.54	0.99	202	45	128	198	0.44	14	24	25	0.49		25.5192	3.36	12.67	5	110	70	5.3	8058	3	1	1	89	26.0162	80	0.57	0.92	201	40	132	200	16	21	26	6.6	5.8			110	62
1	58			3	1	71.1	92	85	0.91	1.12	221	37	158	153	9.24	47	36	43	0.47		25.9895	1.4	4.33	6.4	100	60	6.1	3420	3	1	1	97	26.1892	112	0.55	0.86	254	35	182	148	38	27	37	5.6	7			100	60
1	58			1	1	64.9	85	101	0.75	1.04	224	72	125	162	0.77	70	41	29	1.9		22.6428	1.37	4.31	7.3	130	80	5.4	8666	1	3	1	86	21.7124	93	0.77	0.95	230	60	129	108	60	35	24	6.1	5.7			130	78
1	64			2	1	66.6	87	81	0.7	1.16	236	38	129	450	8.2	51	38	41	0.67		24.1108	1.49	2.89	5.7	120	70	5.3	6641	1	1	1	86.5	23.366	84	0.75	1.1	182	30	109	160	22	24	19	4.9	5.5			120	80
1	52			3	1	73.6	91	90	0.49	1.08	145	42	60	236	1.45	87	40	38	0.23	178.571	25.6782	1.27	2.26	7.4	110	80	5	10078	3	3	2	92.2	25.8737	90	0.95	0.93	167	40	98	137	55	29	21	5.9	4.7			122	81
1	53			1	2	62.8	84	82	1.05	1.22	218	47	152	104	9.25	20	26	19	0.53		22.9834	1.17	4.16	7.1	120	70	5.4	7794	1	1	1	82.5	22.8744	85	1.1	1.21	218	47	145	149	11	32	23	7.6	5.1			110	70
1	51			3	1	74.9	97	96	2.46	0.94	184	54	113	108	1.4	123	36	43	0.68	160.714	26.1936	1.54	4.09	7.4	110	70	5.5	4745	2	3	1	100	31.0134	101	1.9	0.82	162	37	102	138	104	35	56		6.1	0.95		110	70
1	53			1	1	74	87	91	0.56	1.21	196	60	121	120	0.86	23	34	34	2.41		25.2478	1.77	3.03	5.8	120	80	4.9	6753	1	1	2	87	23.8109	88	0.82	1.08	187	50	108	92	16	31	30	5.6	5.2			102	70
2	47			1	1	50.4	73	88	0.74	0.76	168	60	86	123	0.31	14	25	26	0.44		21.3623	1.09	4.2	3.6	120	80	5.7	14113	1	3	1	79.2	20.5745	93	0.53	0.67	182	64	106	65	11	13	11	2.7	5.8			96	68
2	41			1	2	68.2	82	92	0.76	0.89	177	58	101	51	0.38	6	16	11	0.98	37.5	27.2159	1.47	6.19	4.5	110	70	5.4	10230	1	3	2	88	26.7461	87	0.3	0.77	157	51	88	67	12	20	20	3.8	5.2			112	70
2	59		2	1	2	53.5	84	93	0.56	0.87	173	54	90	137	0.97	37	26	22	1.99		23.8732	1.51	10.48	4.7	110	60	6.8	4845	1	1	1	86	24.3149	112	0.6	0.86	177	61	79	183	70	29	32		7.6	0.5		121	70
1	59			3	2	69.1	82	104	0.84	1.23	202	45	136	93	2.89	36	25	24	0.67	12.5	23.6589	1.59	3.08	6	130	80	5.8	5519	2	3	2	96	24.8624	105	0.7	1.24	201	32	132	193	35	25	26	6.8	6			112	72
1	64			3	1	66.9	91	102	0.93	0.99	245	38	150	424	6.11	40	20	28	0.68	125	23.3131	2.13	2.91	3.6	130	80	5.8	2230	2	3	1	96.3	24.8955	111	0.65	1.05	251	31	105	753	45	26	33	4.6	6			130	70
2	47			1	1	61.5	77	81	0.78	0.99	146	49	78	66	2.12	8	17	10	0.89	94.2857	24.9503	0.94	18	4.8	110	80	5.2	13917	1	3	1	73	23.4087	89	0.9	0.84	141	42	76	71	7	22	19		5.3	1.69		128	80
2	56		2	1	2	53.1	80	91	0.91	0.92	189	39	119	140	0.69	8	28	32	0.12		26.8229	2.12	6.31	5	120	80	5.8	11162	1	1	2	89	26.9201	98	0.67	1.02	202	45	124	65	11	25	21	4.1	6.6			120	80
1	60			3	1	61.6	84	74	0.57	1.13	203	37	146	72	1.79	17	18	12	0.13		24.9273	0.97	1.05	6.5	90	60	5.1	4753	3	1	2	85	24.1165	79	0.64	1.06	224	33	155	99	20	21	17	5.6	5.3			100	60
2	49			1	1	68	83	84	0.74	0.83	166	42	105	75	0.55	8	33	32	0.69		26.629	1.71	6.76	4.1	110	60	5.1	13607	1	3	2	81	25.3384	83	0.98	0.74	201	47	129	66	13	27	25	3.3	5.3			100	60
2	45			1	1	49.6	70	93	1.4	0.78	165	55	93	78	0.27	10	16	10	1.11	91.0714	21.1331	1.71	3.82	4.5	113	76	5.4	6710	1	3	1	73	21.2184	107	1.1	0.72	194	62	109	46	10	18	14		5.5	0.11		120	84
2	46			1	1	45.2	65	78	0.65	0.92	225	38	160	95	0.4	23	21	9	0.82		19.0836	1.25	4.78	3.6	110	66	4.9	18441	1	3	2	71	19.8178	82	0.6	0.93	155	40	93	65	17	24	16		5.3	0.24		102	70
2	41			1	1	52.4	73	75	0.88	0.84	219	59	140	82	1.48	12	21	10	0.38		20.858	2.13	10.96	3.5	109	63	5.4	8509	1	1	1	77	20.7386	82	0.7	0.77	216	54	132	105	8	23	21		6	0.24		110	80
1	41			3	1	62.9	85	102	0.64	1.02	256	43	180	177	0.55	63	30	68	0.34	6.66667	24.6627	3.51	2.82	7.6	104	65	6.1	7836	3	3	1	81.4	24.206	108	0.56	0.98	236	37	159	252	49	27	24	6.7	6.1			120	80
2	47			1	2	52.3	71	69	1.07	0.94	167	49	102	34	0.44	12	24	16	0.65		21.9101	1.15	3.03	3.8	110	70	4.7	9296	1	1	2	71	21.5318	79	1.2	0.82	168	54	91	41	11	30	27		5	0.33		119	69
2	63			1	2	47.5	75	87	0.81	0.94	146	44	77	91	0.65	8	26	12	0.83		20.3711	1.52	2.5	3.2	135	76	4.4	14890	1	1	1	81	21.2543	84	0.82	0.91	138	39	72	84	12	25	15	3.5	5			110	60
2	45			1	2	55.2	72	93	0.86	0.9	187	43	130	63	0.34	8	16	12	0.42		22.7699	2.3	5.71	4.6	115	76	5.1	11757	1	1	2	77	23.118	96	0.6	0.74	134	33	70	126	11	19	12		5.1	0.81		110	70
2	53			1	1	68.4	89	125	1.14	0.92	214	39	144	169	4.22	11	20	14	0.57		26.8192	3.55	9.7	4.6	110	60	6	12373	1	1	2	93	26.4935	121	1.1	0.79	205	42	129	144	13	25	19		6.5	0.45		131	91
2	45			1	1	52.7	81	80	1.39	0.77	202	52	138	37	0.49	18	18	9	0.96		22.87	1.49	4.31	4.6	121	74	4.4	4766	1	1	2	75.5	20.4676	91	0.69	0.69	183	44	115	81	12	21	13	3.3	5.3			110	70
2	54			1	2	62.4	79	102	0.76	0.9	271	69	193	96	0.36	9	22	15	0.38		25.38	2.18	6.52	4.7	127	80	5.8	22106	1	1	2	84	25.4667	95	0.73	0.87	266	56	186	134	10	24	18	3.5	5.8			110	70
2	47			1	1	56.2	81	91	0.65	0.88	198	39	134	134	0.73	13	22	20	0.53		24.5504	2.05	7.01	4.7	119	72	5.7	12756	1	1	1	83	24.6169	101	0.7	0.79	203	40	120	175	12	23	22		6.1	0.42		122	87
2	48			1	1	53	75	92	0.91	0.92	188	43	125	104	2.62	17	22	18	0.18		23.1831	2.12	10.75	4.8	136	85	4.7	6830	1	1	1	72	21.7198	89	0.9	0.77	178	42	100	179	12	21	16		4.9	1.39		111	70
2	47			1	2	62.8	81	77	0.42	0.88	175	49	101	102	1.68	7	47	35	2		24.1075	1.27	9.12	3.9	110	80	5.1	13888	1	1	2	87	24.1544	91	0.9	0.86	167	42	104	132	8	21	18		4.7	0.47		100	69
2	48			1	2	59.9	76	91	0.77	0.93	199	39	141	81	0.26	11	18	12	0.73		25.2572	2.18	14.46	3.7	116	67	5	7509	1	1	1	80	24.9101	99	0.9	0.85	209	46	145	103	13	22	23		5.3	0.24		110	69
2	63			1	1	63.4	91	78	0.84	0.8	201	41	133	197	1.33	22	27	25	1.07		27.8058	1.48	20.14	4.8	110	60	5.1	8793	1	1	2	90	25.6	82	1.07	0.75	200	47	116	254	12	19	15	4	5.7			150	90
2	40			1	1	51.2	68	81	1.25	0.93	142	38	82	140	0.58	38	20	10	1.55		20.7716	1.24	5.44	4.4	100	60	4.4	11245	1	1	2	75	20.5225	79	0.82	0.79	132	44	66	95	26	20	14	4.6	5.1			120	80
2	53			1	2	58.5	71	76	0.8	0.94	192	65	115	61	0.8	24	24	24	0.34		23.345	1.09	6.6	4.1	130	80	5.1	15690	1	1	2	77.5	23.8347	85	0.57	0.9	207	65	119	91	21	23	22	4.7	5.7			111	70
2	45			1	1	49.1	67	92	0.83	0.82	181	49	119	75	0.27	15	18	13	0.4		21.6487	2.14	7.85	3.5	110	70	4.7	12191	1	1	1	73	21.885	99	0.68	0.73	164	42	100	58	11	24	17	2.5	5.8			98	60
2	45			1	1	56.4	73	100	0.98	0.78	194	72	100	93	0.37	17	27	24	0.54		24.703	1.82	4.23	3.1	100	60	4.7	15715	1	3	1	77	24.2998	103	1.01	0.75	203	74	114	60	14	17	11	3	5.3			110	68
2	46			1	2	49.6	71	94	0.71	0.86	210	63	120	100	0.79	16	20	15	0.48		20.4863	2.03	12.83	4.8	120	80	5	17721	1	1	2	78	20.9012	110	0.9	0.75	234	71	137	69	12	24	17		5	0.12		111	74
2	47			1	2	58.3	68	72	0.88	0.88	162	50	99	46	0.41	17	27	16	0.46		22.4635	0.87	2.84	4.7	90	50	4.9	3368	1	1	2	77	22.6142	87	0.7	0.84	185	51	108	89	18	28	21		5.4	0.83		120	70
1	62			1	1	59.8	85	73	1.11	1.07	175	38	105	154	0.75	110	36	37	3.21		24.1682	0.9			120	70	4.7	14502	1	1	2	83	23.7635	72	1	0.98	162	40	89	134	138	37	35		4.8	0.59		121	70
2	53			1	2	47.5	73	85	0.66	0.79	190	55	122	75	0.46	31	33	43	0.19		22.1621	1.32	7.08	2.6	110	70	5.1	17263	1	1	1	81.4	22.9091	83	0.59	0.78	199	59	122	87	36	36	35	2.5	5.6			100	70
1	70			3	1	41.5	81	91	0.44	1.01	184	46	120	87	13.04	82	27	14	1.88		16.3332	1.13	0.58	2.7	100	60	4.9	10734	3	1	2	64	15.9782	86	0.43	0.97	193	36	126	98	31	38	22	2.7	5.1			110	60
1	47			2	1	86.2	93	87	0.65	1.1	173	41	80	335	0.85	54	39	59	0.55		29.3417	4.22	5.4	6.4	120	70	4.7	3434	1	1	1	91	27.0485	82	0.82	1.03	159	36	79	199	20	22	24	6.4	5.1			112	72
2	40			1	2	50.8	65	92	0.79	0.99	179	48	115	65	2.36	14	24	13	0.34		23.318	2.14	6.94	4.1	100	60	4.8	15914	1	1	2	71.5	23.2661	96	0.74	1	171	45	101	84	9	23	15	4	5.1			108	70
1	41			3	1	47.6	69	84	1.38	0.96	190	40	127	125	0.51	20	22	12	0.66	151.143	18.7105	1.04	0.66	5.8	110	60	4.4	8899	3	3	1	70.8	18.0899	88	1.03	0.95	159	36	100	94	13	18	10	6.1	5			110	70
1	41			3	1	87.9	99	95	0.83	0.98	224	30	174	139	0.46	45	24	35	0.18		28.4091	2.74	3.51	6.9	110	70	4.3	7790	3	3	1	103	27.7675	99	0.44	0.88	183	34	122	89	40	30	73	6.7	4.9			130	80
1	47			3	1	63.4	82	105	0.69	0.97	168	35	98	227	1.58	41	33	37	0.29	39.1667	24.0095	2.01	3.11	6.2	100	60	5.2	6123	3	3	1	83	22.9112	96	0.5	0.98	154	27	84	168	27	18	20	6.3	5.7			106	70
2	46			1	2	56.7	78	107	1.08	0.76	153	40	90	107	3.98	20	17	14	0.24		25.6771	1.89	6.69	3.7	110	60	5.3	12321	1	1	1	86	25.5015	115	0.8	0.68	181	47	95	213	21	18	23		6.3	1.54		101	60
2	51			1	1	56.4	77	93	0.93	0.98	156	66	68	97	0.36	18	27	26	0.36		21.8397	1.98	4.02	4.2	110	70	5.5	20472	1	1	1	86.5	22.4206	86	0.98	0.85	162	66	70	136	13	24	18	3.5	5.9			132	80
2	50			1	1	48.6	74	93	1.39	0.86	283	54	194	82	3.21	32	24	21	0.46	12.5	23.3401	2.46	18.3	3.1	110	70	5.6	9124	1	3	1	72	22.3007	96	0.84	0.8	181	38	112	135	22	26	24	3.6	6.1			92	60
2	51			1	1	56.5	79	93	0.89	0.84	301	58	196	175	1.64	30	30	32	0.6		27.0216	2.98	10.41	5.1	110	70	5.8	10030	1	1	2	85	26.6165	86	0.6	0.79	249	64	142	93	35	27	24		6.1	5.81		100	72
1	64			1	1	68.8	89	86	0.67	1.13	181	35	90	392	0.92	25	26	20	0.88	21.4286	26.5092	1.63	1.91	7.6	130	80	5.2	7132	1	3	1	96	26.3762	90	0.6	1	196	34	121	211	23	27	28		5.6	1.28		158	90
1	42		2	3	1	69.8	84	136	0.89	1.15	215	35	152	160	1.76	25	23	25	0.66		24.1807	3.66	1.44	6.3	110	60	10.2	2280	3	1	1	82.9	23.1996	234	0.61	1.19	203	31	142	195	24	30	36	6.1	10.4			120	80
2	61			1	1	53.2	69	87	1.01	0.88	152	42	95	67	3.11	18	27	8	0.43		21.3377	1.69	1.82	3.8	120	80	5.9	17484	1	1	1	83	21.4331	93	0.61	0.87	155	32	98	107	13	22	8	3.9	6.2			116	76
1	65			2	1	65.7	87	92	0.65	1.05	161	43	92	132	5.54	24	27	25	1.19	158.333	24.7281	1.58	1.92	5.6	110	70	5	8379	1	1	1	91	25.1448	87	0.86	1.02	165	47	110	91	13	28	26	5.8	5.3			124	79
1	47			2	1	55.8	78	82	0.43	1.08	183	35	112	191	0.39	17	17	15	0.31		20.1041	1.45	1.98	6.4	120	70	4.9	13838	1	1	1	74	19.996	90	0.67	1.09	214	36	122	211	15	21	22	6	5.5			100	80
2	58			1	1	63.4	87	80	1.59	0.83	216	56	125	202	0.66	15	19	15	1.93		26.9074	1.69	9.51	5.2	110	70	4.8	13204	1	1	2	91	26.5016	91	1.5	0.75	240	56	142	170	11	17	20		4.7	0.22		112	72
2	54			1	1	52.3	74	81	0.67	1.09	167	36	107	117	2.06	20	25	17	0.32		25.292	1.71	8.44	5.2	110	60	5.6	9081	1	1	1	76	23.6402	78	0.8	0.89	147	38	86	84	15	25	22		5	0.52		97	76
2	62			1	1	52.8	83	88	0.54	0.82	191	42	131	97	3.37	15	23	12	3.87		22.1482	2.26	9.53	4.8	110	60	5.7	12246	1	1	1	86	21.6872	84	0.47	0.83	154	33	86	116	11	27	20	4.1	5.9			128	80
2	51			1	1	52.9	70	86	1.06	0.88	181	57	104	93	0.34	14	19	12	1.52		23.8278	1.13	8.04	3.9	110	70	5.1	12455	1	1	1	77	23.8788	88	0.72	0.74	159	51	88	99	13	19	16	2.9	5.4			104	70
2	51			1	1	48.4	74	140	1.59	0.99	264	70	171	157	1.74	35	28	27	1.03		24.1049	2.61	13.1	5.2	100	70	7.6	10352	1	1	1	76	23.1551	118	1.36	0.88	264	71	169	112	16	24	21	4	7			118	60
1	52			3	1	82.4	92	89	0.95	1.03	210	43	128	235	0.65	24	22	22	5.41	12.5	29.091	1.83	3.6	6.4	130	80	5.3	12636	3	3	1	93	28.4202	99	0.96	0.85	247	51	165	160	16	23	27	5.7	5.3			140	98
2	46			1	1	61.7	85	85	0.55	0.89	275	54	205	93	4.28	32	27	20	4.99		28.7089	1.18	11.49	5.5	100	60	5.7	12159	1	1	1	87	27.7027	91	0.7	0.81	272	62	191	63	23	28	20	5.4	5.9			128	78
1	51		2	1	2	76.1	90	143	0.97	0.99	176	35	134	63	0.95	19	26	21	0.35		26.2395	2.01	2.63	5.2	110	70	7.3	15883	1	1	1	89.5	27.2631	178	0.58	1.15	213	38	151	153	16	24	24	5.2	8.4			108	62
2	43			1	1	58.1	68	90	1.15	0.87	193	60	112	139	1.18	23	28	18	0.21		23.3918	1.62	7.54	3.8	110	80	5.4	13196	1	1	1	77	23.8244	103	0.9	0.85	203	69	115	37	17	27	20		5.8	4.88		99	72
2	43			1	1	52.6	65	83	0.73	0.85	185	62	113	56	0.21	14	17	9	0.44		20.3429	1.37	4.7	3.6	120	80	5	11382	1	1	1	76.2	20.9313	86	0.74	0.74	228	54	143	108	10	25	18	2.9	5.4			110	70
2	47			1	1	46	64	94	1.01	0.78	195	57	136	37	0.37	15	22	4	2.01		19.4467	1.12	1.73	2.1	110	80	5.1	8988	1	1	1	71	19.1605	93	0.5	0.67	186	45	116	57	10	22	11		5	0.41		111	69
2	59			1	1	60.4	85	83	0.63	0.78	194	40	135	134	0.91	19	20	10	0.35		24.947	1.11	10.37	4.5	120	70	5.4	13139	1	1	1	84	23.7079	79	0.38	0.77	178	41	111	83	13	17	11	4.7	5.6			120	70
2	52			1	1	64.1	80	103	0.54	0.72	176	46	120	75	2.75	17	18	14	0.37		25.3869	1.92	10.43	3.5	120	80	5.9	5913	1	1	2	87	24.847	93	0.5	0.67	143	40	78	105	10	20	19		5.8	0.33		110	70
1	52			1	2	60.3	76	88	0.68	1.06	174	43	123	61	1.41	21	33	12	0.73	53.5714	23.2919	1.41	1.8	6.4	110	80	5.1	10223	1	3	1	84.5	25.2592	92	0.65	1.05	183	42	117	166	24	30	26	4.8	5.6			128	80
1	68			2	1	62.3	80	78	0.47	0.9	183	35	131	95	9.46	11	20	14	0.27		21.7872	1	0.74	5.5	110	70	5.2	13479	2	2	2	87	22.3552	80	0.4	0.92	165	33	106	89	11	19	12		5.5	6.72		110	72
2	64			1	1	50.1	72	82	0.49	0.78	194	60	118	60	2.55	9	21	14	0.48		19.7427	1.25	2.91	4.4	110	60	5.5	19112	1	1	1	76	20.2015	85	0.6	0.77	204	77	105	59	11	20	14		5.5	0.4		112	72
1	51			1	1	62.8	80	89	1.27	0.78	176	46	115	78	1.25	15	28	24	4.48	28.5714	22.599	1.23	1.13	5.5	100	70	4.9	8391	1	1	1	89	23.988	93	1.3	0.71	184	39	97	246	18	36	35		5	0.41		110	70
1	52			1	1	61.8	80	96	1.28	1.03	181	44	115	113	4.11	8	22	14	0.37		20.1796	1.72	1.12	6.5	110	60	5	7840	1	1	1	87.2	22.5002	85	1.32	1.01	189	44	123	125	12	24	21	5.7	5.1			106	68
2	68			1	1	61.1	86	92	0.54	0.81	166	48	99	130	0.49	12	41	44	0.31		26.3416	1.85	8.35	3.9	120	70	5.4	4812	1	1	1	90	25.3395	98	0.7	0.82	144	48	70	96	72	54	134		5.3	0.2		120	70
2	62			1	1	68.8	92	92	0.84	0.92	203	40	140	176	1.16	17	28	19	0.4		26.2155	1.43	12.94	3.9	137	79	5.2	13331	1	1	1	105.5	27.8964	95	0.43	0.95	231	56	160	77	13	24	18	2.7	5.7			110	80
2	53			1	1	58.2	76	100	0.8	0.9	279	40	183	422	1.29	19	21	17	0.49		25.9704	1.79	7.42	6	130	80	5.3	6371	1	1	1	70	22.8939	103	0.46	0.87	152	46	89	67	10	25	27	2.5	5.3			130	88
1	55			3	1	61.1	80	122	1.03	0.86	209	58	129	176	0.85	946	85	81	8.47	53.5714	23.5716	2.22	1.17	4.8	139	84	4.8	6230	3	3	2	80	20.7426	120	1.39	0.95	151	43	71	241	1206	149	125	4.9	4.5			130	88
2	45			1	1	49	71	76	0.57	0.78	244	48	178	127	14.18	19	17	12	0.19		24.6117	1.38	6.27	4.2	106	66	5	11385	1	1	1	71	23.1202	72	0.7	0.73	268	64	174	132	10	21	16		5.2	0.69		119	80
1	55			3	1	68.6	92	109	0.9	1.03	178	33	115	240	7.11	135	69	82	1.46	35	27.6543	3.23	3.88	7.8	130	81	5.7	3815	2	3	1	96	29.0851	140	1	0.97	191	31	90	503	323	84	96		6.4	4.5		128	82
2	67			1	1	51.2	81	86	0.88	0.81	185	36	128	130	1.83	12	20	17	0.53		22.7252	2.32	2.93	3.8	138	77	5.3	17583	1	1	1	84	22.4113	85	0.7	0.8	169	30	103	145	49	228	306		5.7	0.51		99	70
2	51			1	1	58.5	76	88	1	0.68	223	46	166	100	1.49	24	20	26	0.57		24.5392	1.45	5.55	4.5	127	80	5.5	7767	1	3	1	80	24.1517	84	0.8	0.78	191	40	123	125	16	22	20		5.3	2.14		110	70
1	50		2	2	1	61.3	78	237	0.91	1.16	166	64	82	79	8.22	25	15	17	1.18	132.143	20.6726	3.39	1.18	4.5	136	79	8.2	14967	1	3	2	85	22.3172	147	0.8	1.18	146	45	78	69	19	20	20		6.6	3.33		120	70
2	46			1	1	67.9	86	84	1.15	0.83	175	47	109	148	2.01	27	22	25	0.46	29	28.0808	5.03	12.59	5	129	82	4.9	3161	1	3	2	92	30.205	78	1.2	0.8	216	45	136	144	34	23	28		5.1	0.75		99	77
1	45			3	1	65	81	82	1.09	1.25	162	37	110	90	0.45	57	21	25	0.1	71.4286	24.8903	1.59	3.12	6.7	110	70	5.3	5850	3	3	1	85.5	25.0525	94	0.91	1.25	149	36	84	103	54	24	32	7.3	5.8			109	72
2	68			1	2	44.7	74	82	0.6	0.79	203	50	144	98	0.64	13	28	25	0.6		20.3522	1.49	3.53	5.3	110	60	5.3	12351	1	1	1	72	18.8348	79	0.57	0.72	155	43	84	108	21	31	28	4.9	5.8			90	60
1	52			1	1	77.6	91	85	0.67	1.19	218	32	165	205	0.48	18	23	21	0.01		23.5564	1.48	1.6	6	110	80	5.2	9765	1	1	1	85	22.2021	87	0.7	0.97	225	39	153	132	7	22	18		5	0.31		111	68
1	54			1	2	62.3	85	97	0.91	1.17	188	38	136	124	2.94	41	49	32	0.63		22.9947	1.25	2.03	5	120	70	5.7	9755	1	1	1	81	21.9982	89	0.95	1.23	201	38	125	260	20	19	13	5.9	5.8			122	82
1	60			3	2	65.5	83	82	0.93	1.28	204	46	145	99	0.64	23	20	11	0.48	20.8333	22.0377	1.13	0.98	6.9	120	80	5.4	9468	3	3	1	85	21.4679	83	0.9	1.23	198	44	120	125	19	18	13		5.7	0.2		112	89
1	71			1	1	69.7	96	99	1.13	1.21	149	35	94	137	0.47	20	20	13	0.28	50	26.856	1.97	4.53	7	120	70	5.1	11013	1	2	1	98	26.6138	102	1	1.18	150	34	86	111	16	18	14	7	5.1			142	80
1	66			1	1	58	77	106	0.77	1.17	152	48	88	94	0.51	15	28	12	0.43		20.747	1.39	1.16	4.5	120	80	5.5	12772	1	3	1	81	20.6397	106	0.77	1.03	178	64	109	38	12	23	10	4.7	5.7			100	60
1	53			1	2	58.6	80	129	0.44	1.09	169	46	105	98	2.29	43	31	33	0.41		21.9211	2.82	1.04	6.3	110	70	6.2	5070	1	1	2	83	20.9678	126	0.8	1.1	167	58	73	166	119	38	44		6.1	1.09		110	70
2	47			1	1	84.3	94	90	0.59	0.91	193	36	155	93	0.52	13	15	12	0.46	28.5714	30.2632	2.31	13.27	6.4	110	70	5.4	8301	1	3	2	98	29.5121	90	0.9	0.75	154	27	95	143	19	19	23		5.8	0.63		111	70
1	57			2	1	62.4	83	91	1.27	1.09	184	35	138	95	2.09	26	22	26	0.17		23.6017	2.07	1.63	6.1	110	70	5.4	8952	3	1	1	87	24.4561	94	1.4	0.92	210	42	130	160	25	24	32		5.7	2.08		120	70
2	54			1	1	58.5	71	75	0.57	0.86	168	54	96	122	1.69	17	17	12	0.34		22.8802	1.44	4.4	4.3	110	60	4.8	3995	1	1	1	83	23.0673	80	1	0.82	211	54	121	146	93	44	43		4.7	0.69		109	71
1	60			2	2	57.1	82	91	0.75	1.08	177	46	115	130	0.65	16	32	28	0.24		17.3143	1.17	0.5	3.7	110	60	4.9	2443	1	1	2	71	16.9902	95	0.81	1.13	187	33	119	179	12	29	20	3.2	5.5			104	70
1	59			1	2	64.6	89	79	0.75	1.03	192	47	131	108	22.85	30	29	24	0.55	50	25.3293	1.02	1.73	6	130	80	5.1	9319	1	3	2	83	26.1397	85	1	0.95	190	40	114	219	36	39	53		4.9	0.71		131	81
1	67			3	1	55.8	77	82	0.83	0.88	168	49	99	72	2.75	15	22	17	0.93	53.5714	20.7213	1.09			101	61	5.2	13153	3	3	1	80	21.777	85	0.9	0.83	196	48	114	91	24	24	17	3.4	5.4			110	70
2	46			1	1	50.9	77	89	1.37	0.72	134	45	71	57	0.28	11	18	12	0.32	21.4286	22.2058	2.33			128	71	5.3	23077	1	2	1	75	22.0897	91	0.51	0.82	130	40	69	48	11	18	13	3.7	5.5			104	66
2	61			1	1	62.2	88	115	0.62	0.79	240	37	188	137	1.4	25	25	20	2.17	12.5	25.9902	2.15			125	71	6	19720	3	3	1	88.5	26.3849	115	0.31	0.84	195	44	128	92	43	23	30	4.1	6.9			130	90
2	39			1	1	49.1	70	85	0.83	0.91	125	51	55	40	0.17	8	17	10	0.33		20.332	2.51			96	59	4.4	19773	1	3	1	69	21.879	88	0.79	0.97	108	42	39	75	12	21	15	4.3	5.3			94	60
2	42			1	1	70.1	94	96	0.71	0.84	161	39	104	73	0.12	9	19	14	0.47		29.9849	2.33			132	84	5.5	11052	1	1	1	97	29.8729	102	0.5	0.86	183	45	119	66	13	20	13	3.6	5.2			119	83
2	56			1	1	61.7	94	89	0.54	0.68	212	49	140	97	0.36	20	19	19	0.43	18	24.622	2.27			135	77	5.7	18923	1	2	1	93	25.3638	108	0.5	0.75	244	53	167	95	46	21	31	4.1	6.1			128	98
1	47			3	1	73.6	92	90	0.84	1.17	295	53	192	128	0.56	95	35	42	0.36	11.6667	24.1429	2.84			122	75	5.4	5787	2	3	2	94	24.4005	97	0.76	1.19	290	61	192	116	116	32	35	8.3	5.6			129	90
2	64			1	1	54	85	89	1.34	1	196	61	94	75	0.29	8	15	12	0.79		24.4873	2.16			109	72	5.6	10399	1	1	1	80	23.4763	94	0.87	0.95	212	61	119	114	14	19	15	4.7	6			111	80
1	66			3	1	59.1	83	83	1.07	0.98	168	28	92	289	0.32	13	18	14	3.69		21.7607	1.71			131	70	5.4	6547	3	1	2	89.2	22.1827	94	0.83	1.03	204	32	150	217	17	20	19	6	5.9			104	62
2	56			1	2	50.8	76	85	0.76	0.76	197	49	114	124	0.24	7	24	16	0.4		19.5252	1.77			117	74	5.4	29219	1	1	1	77	20.0248	107	0.8	0.85	179	47	98	150	10	28	18	2.4	5.6			100	60
1	59			3	2	61.4	86	97	0.83	0.92	184	37	114	102	0.56	9	17	13	0.49	1.66667	23.7759	1.62			133	82	5.4	4867	3	1	1	89	23.2823	87	0.75	1.05	179	34	118	90	13	18	11	5.7	5.8			140	80
1	41			3	2	75.3	85	85	0.83	0.98	197	41	123	115	0.38	37	34	37	8.89	163.095	26.2093	1.4			114	81	5.3	5118	2	3	2	91.9	28.0937	94	0.96	0.95	195	34	86	487	87	39	53	7.3	5.4			118	80
1	61			1	2	57	85	100	0.69	0.99	150	31	87	74	2.53	11	29	19	0.46		23.6337	1.65			116	74	5.6	13972	1	3	1	83	24.0893	104	0.73	1.09	158	31	96	115	14	30	22	4.2	5.9			130	80
1	55			1	1	61.1	79	104	2.66	0.79	123	63	43	52	0.13	13	29	20	0.42	142.857	21.9083	1.61			129	81	5	6288	1	3	1	78.2	18.5719	106	1.3	0.83	133	42	58	132	18	19	15	5.5	5.2			100	70
2	45			1	2	59.9	78	87	0.85	0.77	133	39	77	68	0.14	13	32	19	0.87	36	22.4898	1.29			109	60	4.8	16554	1	3	1	73.2	22.0498	89	0.77	0.83	165	46	88	100	13	28	17	4	5.2			110	70
2	48			1	2	55.7	70	94	0.93	0.76	222	36	157	106	1.26	25	24	22	0.61	3.33333	23.1245	2.39			122	85	5.2	10552	1	3	2	82	22.3645	98	0.52	0.71	203	42	130	76	14	19	13	4.4	5.5			120	80
2	57			1	2	42.5	69	82	0.46	0.79	227	48	148	105	1.74	66	23	24	0.85	61.6667	17.9204	1.53			118	67	5.9	17893	1	3	2	68	18.5548	110	1.35	1.19	191	39	126	84	23	79	36	6.2	6.3			120	80
2	54			1	2	69.4	88	87	0.46	0.77	154	47	82	114	0.32	75	28	12	0.48		27.9059	2.11			114	71	5.6	13765	1	1	1	89	27.9525	87	0.46	0.76	157	39	87	88	19	23	21	4.5	5.6			130	90
2	48			1	2	57.4	80	94	0.95	1.02	185	28	130	126	0.35	9	20	13	0.49		22.3102	1.89			120	72	6.2	10939	1	1	1	79.4	21.8126	95	0.6	0.96	227	30	161	123	13	17	11	4	5.8			100	60
2	48			1	2	63.3	76	94	0.76	0.82	187	34	123	151	0.06	9	25	15	0.61		25.2924	3.01			129	67	5.7	10776	1	1	1	88	25.7719	92	0.44	0.77	161	32	105	115	13	22	14	3.1	5.9			110	70
1	69			3	1	59.8	88	81	0.53	1.03	282	33	201	235	0.81	23	20	23	0.42		23.5061	1.14			132	79	5.3	13556	3	1	2	85.2	23.7441	87	0.45	1.08	194	29	131	174	18	18	18	6	5.7			122	62
1	45			1	2	77.7	92	106	1.1	1.02	186	35	120	136	1.05	21	28	28	0.62	87.5	29.5338	1.95			110	60	5.1	4636	1	3	1	98	29.0641	108	0.69	1.09	199	40	133	154	33	34	53	7	5.3			156	88
2	47			1	2	54.3	76	84	0.58	0.72	165	44	96	122	0.43	8	27	18	0.39		24.7565	1.3			113	67	5.3	13846	1	1	1	82	24.9825	78	0.49	0.74	180	42	100	174	10	22	19	4.3	5.5			114	70
2	70			1	1	45.9	77	91	0.76	0.79	172	34	123	39	0.27	11	26	13	0.64		21.9218	3.64			135	79	5.7	16913	1	1	2	74	22.3316	87	0.77	0.78	205	38	138	55	13	22	13	2.2	5.8			120	80
2	60			1	1	57.1	81	84	0.81	0.98	229	48	150	132	1.11	15	26	21	0.5		25.076	1.47			98	61	5.6	13801	1	1	1	80	23.5134	80	0.82	0.95	257	48	178	103	15	19	15	5	5.7			120	80
2	60			1	1	74.9	99	79	1.43	0.89	132	40	58	41	3.55	24	32	15	0.4		32.291	2.55			130	65	5.3	28823	1	1	1	106	32.0666	79	1.62	0.74	135	39	64	43	32	47	21	3.7	5			120	60
2	68			1	1	57.6	93	83	0.6	0.75	170	39	92	72	2.42	10	17	12	0.36	36.7619	26.4752	2.8			106	66	5	14897	1	3	1	100.5	25.0546	82	0.54	0.74	181	39	111	98	13	20	12	3	5			122	64
2	43			1	1	48.9	68	86	0.9	0.74	219	61	119	82	0.47	12	25	17	0.62	3.33333	20.2492	1.06			121	74	5.4	19436	1	3	1	73	18.7262	83	0.92	0.8	241	70	141	60	23	25	16	2.6	5.4			118	80
2	69			1	1	42.4	77	93	0.85	0.79	171	37	95	116	0.48	8	28	14	0.45		20.1387	1.83			117	73	5.5	18452	1	1	1	74	18.8477	85	0.81	0.71	164	37	100	107	11	22	16	3.3	5.7			109	69
2	55			1	1	51.2	76	103	0.88	0.84	226	39	151	106	0.13	8	28	18	0.5		22.4552	1.82			126	81	5.7	16233	1	1	1	79.2	23.6642	95	0.65	0.82	217	33	160	83	11	29	17	4.7	5.7			106	60
1	55			1	1	67.2	88	124	0.94	1	179	34	99	159	0.18	11	24	27	0.34	16.6667	25.7328	10.86			124	79	6.5	5177	1	3	1	88	24.676	130	1.03	1	177	38	101	153	8	37	38	5.7	6.2			120	80
2	52			1	1	55.5	76	91	0.82	0.81	219	46	115	200	0.49	10	24	16	0.33	22	21.734	1.63			112	79	5.8	17399	1	3	1	80	21.8706	84	1	0.83	228	69	125	44	9	31	19	4.8	5.5			120	60
2	45			1	2	56.1	74	100	1.37	0.92	198	52	108	102	0.1	13	18	9	0.29		22.024	2.26			107	73	5.7	16874	1	1	2	73.2	22.4097	97	0.99	0.98	171	45	103	80	13	17	12	5.1	5.6			110	70
2	53			1	1	52.5	79	102	1.36	0.67	169	42	86	95	6.21	78	37	39	0.44		22.4273	2.23			138	88	5.4	13761	1	1	1	83	22.6929	105	0.99	0.9	199	45	127	86	47	72	84	4.2	5.8			130	80
2	43			1	1	63	87	84	0.94	0.77	249	51	144	237	0.12	21	18	24	0.99		24.548	2.24			121	79	5.7	14995	1	1	2	86.9	23.7797	87	0.8	0.83	214	44	137	172	18	20	21	4	5.6			110	70
2	64			1	1	51.2	77	87	0.53	0.76	153	35	77	128	0.52	6	24	20	0.52		22.0445	1.27			134	87	5.4	13233	1	1	1	86.5	22.2015	88	0.5	0.78	205	48	147	87	12	28	23	4	5.6			140	90
2	67			1	1	50.6	78	87	1.18	0.74	216	45	123	141	0.89	12	23	19	0.58		22.8838	1.54			134	71	5.6	19202	1	1	1	83	23.1127	88	0.73	0.79	199	39	110	230	12	27	18	4.8	5.7			110	60
2	48			1	2	50.2	77	90	1.07	0.75	191	48	103	91	0.42	74	45	44	0.48	67.5	21.8715	2.05			124	75	5.3	11120	1	3	1	74	19.6807	85	0.78	0.85	166	57	80	66	56	55	54	4.5	5.1			110	80
2	65		4	1	1	55.6	79	97	1.23	0.93	161	29	81	221	1.07	11	22	18	0.42		24.7111	2			129	76	6.3	6810	1	1	2	86.4	25.5452	107	1.1	0.86	173	37	121	150	16	30	24	4.8	6.6			120	80
1	62			3	1	56.7	82	85	0.84	0.79	173	43	105	66	26.73	23	25	26	3	71.4286	21.6584	2.29			121	75	5.5	9717	3	3	1	87.5	23.1481	78	0.68	0.96	222	54	132	127	38	31	31	5.6	5.4			130	80
2	60			1	1	48.3	79	77	0.85	0.8	162	37	92	135	0.24	10	27	16	0.32		21.2395	1.08			111	67	5.7	9016	1	1	1	84	22.119	80	0.51	0.89	192	38	123	140	14	30	20	4.2	5.8			90	60
2	60			1	1	54.3	82	96	1.2	0.82	288	57	201	92	0.22	12	26	22	0.3		23.0453	1.33			121	63	5.7	17648	1	1	1	83	22.0813	95	1.09	0.89	258	47	178	133	10	22	17	5.5	5.7			88	42
2	59			1	1	64.6	88	93	0.65	0.85	216	46	138	126	0.85	17	26	26	0.47		27.6685	1.44			119	69	5.8	10565	1	1	1	92	27.064	97	0.52	0.95	211	47	128	126	20	25	24	4.4	6			102	76
2	68			1	1	52.3	83	76	0.49	0.74	174	44	106	96	0.47	7	19	15	0.5		23.121	1.35			118	71	5.4	18162	1	1	1	77.4	23.8732	78	0.53	0.97	179	37	107	120	11	20	16	5.1	5.5			120	79
2	54			1	2	70.7	92	86	0.78	0.84	179	50	106	82	0.39	10	30	27	0.35		27.4454	1.15			119	76	5.5	4726	1	1	2	89	27.1976	91	0.59	0.85	194	49	117	78	13	36	30	3.7	5.5			117	70
2	53			1	1	65.1	84	101	0.51	0.84	189	34	111	208	1.23	19	23	34	8.09		27.1318	4.75			130	87	5.7	13819	1	1	2	55.6	26.7019	83	0.81	1	186	24	127	76	15	24	25	5.5	5.4			110	70
2	52			1	1	61	80	92	0.98	0.71	210	61	119	92	0.77	14	17	15	0.81		23.739	3.24			135	74	5.2	5977	1	1	2	91	23.6813	98	0.94	0.9	193	42	118	83	46	32	43	4.8	6			120	80
2	70			1	2	38.3	72	94	0.81	0.57	172	52	98	71	1.59	79	28	26	1.32		18.5475	1.05			133	84	5.4	17739	1	1	1	71	18.9086	90	0.86	0.64	176	57	111	102	36	24	18	2.6	5.5			125	71
1	68			2	1	65.1	84	94	1.05	0.9	192	44	118	121	0.56	20	28	22	0.5		23.0107	2.17			124	68	5.2	3712	1	3	1	89	22.8364	90	0.95	0.88	136	44	66	77	35	32	43	5.4	5.4			100	60
1	47			3	1	62	75	86	0.68	1.07	158	40	96	76	1.1	11	25	13	0.26	109.667	21.1043	1.19			127	80	5.7	15610	3	3	1	79	21.1937	96	0.69	1.12	189	36	125	76	15	23	16	5.5	5.8			109	72
2	49			1	1	43.8	66	94	0.61	0.9	184	32	122	110	0.13	11	22	16	0.93		19.9155	2.07			111	65	5.5	8375	1	1	2	78.5	21.846	99	0.61	0.69	135	33	84	103	14	22	18	2.8	5.6			95	60
2	40			1	1	50.2	68	75	0.85	0.83	188	52	105	67	0.39	10	21	21	0.62		22.9803	3.6			122	71	4.9	7744	1	1	1	79.2	22.172	89	0.54	0.86	182	49	110	48	14	19	13	4.2	5.1			100	60
2	45			1	1	61.5	89	108	0.68	0.83	204	37	119	207	0.64	13	20	20	1.22		26.6188	9.72			120	79	4.7	6667	1	1	1	82	26.3243	93	0.86	0.74	217	45	144	125	17	20	18	4.3	4.7			104	80
2	53			1	1	65.9	75	111	0.58	0.82	143	34	77	102	1.56	9	18	16	11.14		25.3289	1.97			137	82	5.7	18780	1	1	1	79	23.9038	115	0.41	0.89	217	52	138	90	13	16	13	3.8	6			119	80
2	47			1	2	50.8	74	84	0.75	0.82	193	60	97	96	0.29	9	18	12	0.56		22.1622	1.16			111	71	4.7	22258	1	1	2	73	21.9294	79	0.91	0.77	197	58	110	53	12	21	17	3.4	5.2			129	70
1	64			2	2	60.8	77	85	0.8	1.1	217	37	145	87	6.21	13	29	19	0.89		22.3595	0.85			124	69	5.4	5467	1	1	2	80	21.0466	83	1.02	1.06	204	36	135	103	14	27	18	4.8	5.5			97	70
2	47			1	1	69.1	86	89	0.77	0.81	219	43	131	147	1.47	13	19	23	0.43		26.4603	2.76			119	71	5.1	11525	1	1	1	87	25.9809	86	0.56	0.81	215	39	120	257	12	28	31	4.9	5.3			109	68
2	58			1	1	60.6	86	102	1.27	0.8	294	47	200	191	0.54	64	27	26	32.1	8.33333	26.3678	2.97			117	80	5.3	5948	1	1	1	86.8	25.4375	98	0.76	0.75	274	48	189	216	124	44	60	5.2	5.6			108	60
2	48			1	1	63.2	89	97	0.78	0.68	216	53	124	113	0.33	14	17	19	0.37		26.2044	2.42			110	63	4.6	10721	1	1	1	92	26.3892	96	0.76	0.69	196	39	120	126	17	24	43	2.5	5.1			96	70
1	50			1	2	68.8	88	84	1.19	0.98	167	38	90	186	1.07	29	22	27	0.82		23.9187	1.39			112	70	5.1	6455	1	1	1	92	24.0011	88	0.91	0.95	140	32	74	162	23	22	23	4.1	5.4			90	50
2	47			1	2	53.3	69	86	0.42	0.85	167	44	88	113	2.02	17	28	28	0.35		21.8457	2.11			123	74	5.6	7958	1	1	1	75.5	21.4902	92	0.38	1	189	34	119	114	18	44	64	4.9	6.1			111	60
2	63			1	1	47.9	77	82	0.62	0.76	253	38	169	180	0.34	10	26	13	0.38		19.9119	3.62			127	77	5.3	2974	1	1	1	72.2	19.9929	76	0.68	0.69	247	45	192	137	13	24	20	3.1	5.6			120	60
1	65			1	2	73.8	101	100	0.9	1.08	211	33	133	155	2.01	33	26	35	15.63	76.4286	28.2601	2.96			137	81	5.1	3198	1	3	1	99	29.0979	85	0.85	1.09	197	34	135	187	22	24	27	6.2	5.6			138	90
2	61			1	2	55.8	76	91	0.55	0.96	296	39	194	240	1.19	23	24	17	0.27		22.7827	2.1			116	70	5.5	12508	1	1	2	85	21.8906	91	0.71	0.91	276	45	193	143	15	32	20	1.1	5.7			100	70
2	52			1	2	63	74	86	0.68	0.77	196	40	123	83	0.99	12	34	21	1.53		26.8075	1.19			114	71	5	15540	1	3	2	83.5	27.4253	86	0.68	0.81	223	48	155	133	17	23	17	4.5	5.5			110	70
1	54			1	2	82.6	89	85	0.55	1.1	209	32	129	220	1.39	34	26	26	0.43		27.1262	1.55			122	79	5.7	7802	1	1	2	98	26.8947	101	0.67	1.03	204	39	131	285	119	34	65	5.4	6.1			120	80
[truncated: 17 more columns]
